# Supplementary material for: Genome-wide analysis of the R2R3-MYB gene family in Spatholobus suberectus and identification of its function in flavonoid biosynthesis
Source: Front Plant Sci. 2023 Aug 21;14:1219019. doi: 10.3389/fpls.2023.1219019 (PMC10476624; doi:10.3389/fpls.2023.1219019)
Supplement: Supplementary file 1 [file Table_1.xlsx]

## Sheet: Table S1
Supplementary Table 1. Primers used in this study
Oligo names	Sequences (5'->3')	Description
SsMYB2-F	ACCATGAACCGTTGACACCAGATTC	qRT-PCR
SsMYB2-R	TACTCGTTGCTTCTTGGTTGCTCTC	qRT-PCR
SsMYB10-F	TGGCGAGAAAGCAAAGGGAACAG	qRT-PCR
SsMYB10 -R	GAGGAACGAGGAAGTGGTGGAATC	qRT-PCR
SsMYB26-F	TGTGAGCGAGTCCAGCGTACC	qRT-PCR
SsMYB26-R	GGAGGGATAGGGATAGCGAGGTTG	qRT-PCR
SsMYB38-F	ACCACAAGGACACCCACTCAGG	qRT-PCR
SsMYB38-R	TCTCTTATCCTTCCCTCCCGTAAGC	qRT-PCR
SsMYB48-F	CGGGAAATGGGTCTGATGATTCTGG	qRT-PCR
SsMYB48-R	CCACCTAACCGCTGCACAGATTC	qRT-PCR
SsMYB50-F	TCCCTGGACAGAACAAGAGGACTAC	qRT-PCR
SsMYB50-R	ATTAACCCACCGTAACCTGCAACTC	qRT-PCR
SsMYB 64-F	TGGAGGAGGAGCAGAACTGTTACC	qRT-PCR
SsMYB 64-R	AGGCAGAAGCTGGTGACTCAAAAC	qRT-PCR
SsMYB77-F	GCAGGAAGGTTACCAGGAAGAACAG	qRT-PCR
SsMYB77-R	CACAGGCAGGCTCTTGTTGGG	qRT-PCR
SsMYB84-F	TGCAACAACCAGATCAGCCATGTC	qRT-PCR
SsMYB84-R	TCCACCCACTAACACTACCACCAG	qRT-PCR
SsMYB86-F	GAGGACTTGAAGAGCGGTAATGAGG	qRT-PCR
SsMYB86-R	GCTGACTGACACAGGAGAGTTGATC	qRT-PCR
SsMYB105-F	GAGTTGGATGCTGGAGTTCGGTTC	qRT-PCR
SsMYB105-R	AGATCCTCCTCCTGCTGTGAGAAC	qRT-PCR
SsMYB106-F	AGTGCTGTTGGCGTGCTGTG	qRT-PCR
SsMYB106-R	ACAAGTTGCTCCTCTGCTTCTGTG	qRT-PCR
SsMYB 109-F	AGATCCGATGTGAGCGAGTCCAG	qRT-PCR
SsMYB109-R	GAAGAGACAGCGACAGCGAAGTG	qRT-PCR
SsMYB120-F	ACGAGCTGGCTTACCACTCTACC	qRT-PCR
SsMYB120-R	AGATGATGTGCCTGCTTGTGAGTC	qRT-PCR
SsMYB121-F	AGTAGAGCGCATTCAAGCAGCAG	qRT-PCR
SsMYB121-R	AACAGTTGTAGTGGCGGTGATAGC	qRT-PCR
SsMYB 124-F	CATGCAACTTCAAAGCCTCCAGAAC	qRT-PCR
SsMYB 124-R	CATCACGGGGTTAGAGCCATCATTC	qRT-PCR
SsMYB126-F	GCAGCCAATGATTCAGCCAACAC	qRT-PCR
SsMYB126-R	GGGTGGACGCTAAAGGGTTGTG	qRT-PCR
SsMYB128-F	AAAACCCCTGTGAAGCTGCTGAG	qRT-PCR
SsMYB128-R	TGCTGATGCTGCTGCTGAACC	qRT-PCR
SsMYB133-F	GCTCTTGATTCTCGACCTCCATTCC	qRT-PCR
SsMYB133-R	GCTTCGCCTGCTTCACCACTC	qRT-PCR
SsMYB 135-F	TGGGGAACAGATGGTCAACTATTGC	qRT-PCR
SsMYB135-R	CAGCCTCTTCTTCAAGTGGGTATGC	qRT-PCR
SsMYB156-F	AACTTATGGACACGGTTGCTGGAG	qRT-PCR
SsMYB156-R	AATGAGTGCTGCTTCTTGAGGAGAG	qRT-PCR
SsMYB172-F	AGGTCAATCTGCTGCTTCAGTTCTG	qRT-PCR
SsMYB172-R	ACTGGGTGAGTGCTTCATGCTTATC	qRT-PCR
SsMYB18S-F	AAGGCTCAGATTCCCGATGT	qRT-PCR
SsMYB18S-R	CCCTCCTTCACCTTGACCTT	qRT-PCR

## Sheet: Table S2
Supplementary Table 2. Characteristics of the 181 R2R3-MYB genes in Spatholobus suberectus of this study
Subgroup	Gene name	Gene ID	Start site (bp)	End site (bp)	Exon	Amino acids	PI	MW(kDa)	Localization	Amino acid sequences
A6	SsMYB1	evm.model.Chr1.1041	22413882	22419190	6	313	7.71	34126.9	Extracellular (Secreted)	MYPRLIHPHDAIVAQEDMQGAASNLSHAHKGDPCLVLTADPKPRLRWTQDLHERFVDAVTQLGGASKATPKAIMRTMNVKGLTLFHLKSHLQKYRLGKQSGKDVGEGCKDGSYLLESPGTDNSSPKLPTSDTNEGYEIKEALRAQMEVQSKLHLQVEAEKHLLIRQDAERKYMAMLERACKMLADQFIGATVIDTDSQKFQGIGSKAPRGSLVDPLGFYSLPSAEVAGVNVPKEEIPPSLPLQRADCSTESCLTSHESSGGLTLEGSPGGGRRRMLGMDSMAAPLIWSEAKMRTQAINVAQGNHPQGITRYGM*
A6	SsMYB2	evm.model.Chr1.1042	22425908	22430554	6	329	6.46	35625.9	Plasma membrane	MYHSKNVPSASLIGGNSLVHGQHIDCGGSTMDPGSGGNSLSNNSNLTSKQRLRWTHELHERFVDAVAQLGGPDRATPKGVLRVMGVQGLTIYHVKSHLQKYRLAKYLPDSSSDEGKKADKKETGDMLSNLDGSSGMQITEALKLQMEVQKRLHEQLEVQRQLQLRIEAQGKYLKKIIEEQQRLSGALSEAPGSGVAALVPGDACQEPDNKTDPSTPDPEKAAKDRAPAKSLSIESFSSHHEPLTPDSGCHVGSPADSPKGERATKKQRVSMDGVYSKPDMVLPHQILESSMSSYQQPNTVFLGQEQFDPSLGIPTRSGEELDKVGGSNL*
A11	SsMYB3	evm.model.Chr1.1197	26117198	26119399	3	333	6.09	37556.6	Nuclear	MEVKGRVSNSTATIQSEDEMDLRRGPWTVDEDLALINYIANHGEGRWNSLARSAGLKRTGKSCRLRWLNYLRPDVRRGNITLEEQLLILELHGRWGNRWSKIAQYLPGRTDNEIKNYWRTRVQKHAKQLKCDVNSKQFKDAMRYLWMPRLVERIQAAAATAAMAPTAGSPTVSASATTTIANNNTTYNYDSNNLNNNFEVHSGNMMLSPAIMNNNFGGSQVAHSYTPENSSTGASSDSFGTQVSPVSDLTQDYYNNVTVGNNNNNPNLAYYQQTHDQLSFLDCITSPSGLFPQEMDFQSMEPNTPWIQSNGDTSNGFWNVENMLLFQQLTDNM*
A17	SsMYB4	evm.model.Chr1.1275	27912093	27918377	3	331	5.41	37391.6	Nuclear	MGRYPCCEKVGLKKGRWTAEEDKILTDYVQENGEGSWKTLPKNAGLLRCGKSCRLRWINYLRADVKRGNITPEEEEIIVKLHAVLGNRWSIIAGHLPGRTDNEIKNYWNSHLRRKIYCFMRSLNESLPPIDMAAVNAATSKRRGRGSRNKPSMEEEKSTALSQNSFESMPSCNREKAEEISMMDVHYETEGNTSSTVASYPSLEGLGPYQHLSNDEIMRLSHVFENGGLVNPSGNVTLKEEPNGNDYEQMHVDIMGTTQESKSGVWSSSNGESGEWYPNCSSVNSTIDYQWSDWDMTGSVQSNNQWNLSEEDQKMTCLWDTGIGEVNGFHP*
A31	SsMYB5	evm.model.Chr1.2117	59578534	59580808	3	391	8.41	42669.2	Extracellular (Secreted)	MGRTPCCSHEELRKGAWMVQEDQKLVAYIQKHGTGSWRTLPQKAGLQRCGKSCRLRWFNYLRPDIKRGKLSQEEEQTIIKLHAVLGNRWSSIAKHLPMRTDNEIKNYWNSYLKKHFEKKVVDPVSPKPVSTDSSTESKSNDLCMVPYKKTACHGPNATTRQSHPHSLSKSMSSSTQLLNKVASKILASGYLEAIKSCQPVVAGKSNSESVVKTGIGLEKDNVTEPLVPNLTSSHSSTSAQLLNKMATSLPHKVRGLGAAKAVFSKLMESGEKGETTSDGSFIGSDEVGGCLNALSHFEDGPHITKVIGSPSSPTLMFNQVTTPSCFSDNEDNWQCVSSNCVSFRNCAASGGDCGVSEINLGESSSSTSCFLFEDADLGTCDDEISKYIQYL*
A26	SsMYB6	evm.model.Chr1.2135	60287438	60289836	3	300	8.76	33993.3	Nuclear	MGRPPCCDKVGIKKGPWTPEEDIVLVSYIQEHGPGNWRSVPTNTGLMRCSKSCRLRWTNYLRPGIKRGNFTDHEEKMIIHLQALLGNRWAAIASYLPQRTDNDIKNYWNTHLKKKLKKIQTGSDDDNDKGNSCSQIKGQWERRLQTDMHTAKQALCEALSLDKPTHIFPETKLTSASHHHHPHPTTSNQTSLYASSTENIARLLENWMKKSPNKTETNSFSNMIVTTGSSSSEGTQSTITCTQDHALDSLLSFNSDRSQSVSAEENTNLGESKPNHETQVPLMLLENWLLMMRHLNAMKI*
A4	SsMYB7	evm.model.Chr1.2260	63507684	63509459	3	464	7.58	53287.3	Nuclear	MDLETMLKETYVSQPMHLQESCLQPSMRDMLPSGNPSSHGFMKDFHHIDQFHVNDSSSNPIQTPNFDTFDNFSFIGSSPFDVYECKPFVENSDRHAQVMDNFLYGNYSLNLPQRNQLDVMATNQSFLTFNSQQTKPANFVVPDEVSSISPVNYYKRVGVNKNNKSYPTTRRTYKVRKKSNIVKGQWTIEEDGLLIQLVEQYGLRKWSHISKVLPGRIGKQCRERWHNHLRPDIKKDRWTEEEDKILIHAHAEVGNKWAEIAKRLSGRTENSIKNHWNATKRRQYSKRKCRSKYPRGTLLQEYIKSLNLDKNPPVDYRRKSSANYASALKNKTSTSKVIAPALPQIAYQFCATDCLSPNYDFNVGPDFFFGENLFEGGCSIDSLLDDVPCAPPMGKEDFE…
A18	SsMYB8	evm.model.Chr1.2295	64341154	64342951	3	361	5.86	40609.8	Nuclear	MGRHSCCLKQKLRKGLWSPEEDEKLFNYITRFGVGCWSSVPKQAGLQRCGKSCRLRWINYLRPDLKRGMFSQQEEDLIISLHEVLGNRWAQIAAQLPGRTDNEIKNFWNSCLKKKLMKQGIDPATHKSLLNIEDHIIKEEKEPTETPPMLLPVSQGILASSQESLLVVNNSNYYDGGLAVTESSREVFMSKSALDPLSYFEFQMGYNSSVSHCHPIRQFDQNQVGTNSSYGFSSMPCLTSSDHGNVSVAEFSDNNSASKICSLLMNDQVKESSSNSSSMSVYPGCQMSSMMKNGGFSWDGENKLDPLLQFQVNVVKSEEFKTSSWQEGQILAQNSIDFTSYPLMSLSEDLTGANFDVFRQM*
A22	SsMYB9	evm.model.Chr1.2509	68682950	68684484	3	311	8.85	34390.6	Nuclear	MGRSPCCEKEHTNKGAWTKEEDERLINYIKVHGEGCWRSLPKAAGLLRCGKSCRLRWINYLRPDLKRGNFTEDEDELIINLHSLLGNKWSLIAARLPGRTDNEIKNYWNTHIKRKLYSRGIDPQTHRSLNASATPATTTTATAVPPSNTTLPVVTSGNKKNNDSISSSNNNINKNNNNGSFQLVASAHANDTKIGTDLVGEDSNSSSGVTTEESFPHHQLNLDLSIGLPSQPQVSSVAPEKLKPQPQELDQKPRVLYQWYGNISGQGVCLCYSLGLQSNQACYCKAMGTAATVTTTATENNLCRFYRPMNI*
A3	SsMYB10	evm.model.Chr1.2938	76372094	76374122	2	331	8.84	37914.8	Extracellular (Secreted)	MEDSSAGEDTKTCPRGHWRPAEDEKLRQLVEQYGAQNWNSIAEKLQGRSGKSCRLRWFNQLDPRINRRPFTEEEEERLLAAHRIHGNKWALIARLFPGRTDNAVKNHWHVIMARKQREQSKLCGKRSFQDVYNDSTTSSFLEKRTQQSQDLLFSARFGLENGRFFDFRNLDNNKDNNNNNRIVADTPSSSLASWNFASVPTTTNGSTVGDALRKGGRDYFNSSSSCSSNIYLSECSRSSDRSFLYRVYPNPAFSLPNYKRVVPSPFRFLGSSDDGRIKRDNLMSFCDNSSTFTKLRDSTEKDHQQTNEDETNIEPKEVPFIDFLGVGVSSS*
A28	SsMYB11	evm.model.Chr1.3132	81216565	81218199	3	338	6.03	37645.2	Nuclear	MGRSPCCDENGLKKGPWTPEEDQKLVQHIQKHGHGSWRALPKLADLNRCGKSCRLRWTNYLRPDIKRGKFSQEEEQTILHLHSILGNKWSAIATHLPGRTDNEIKNFWNTHLKKKLIQMGFDPMTHQPRTDLVSSLPYLLALANMTDLMDHQSLDEHAVRLQAEAVQLAKLQYLHYLIQSSNSLSTNSYDQNATTNNMEAFSLLNSISNVKENQVIDCLQPDTPASFSHAIASSQPLHHPSMLPHLLEPQVSFSSQSCLNSEMGQGTNFAMISQGDHTVDHDSSWIIPSPAPSIPPNVIGTSANNPGDASSSTSSYGGGPSSYWSELFFEDPIMHELS*
A29	SsMYB12	evm.model.Chr1.347	8170845	8172449	4	360	5.62	41005.8	Nuclear	MGRAPCCDKNGLKKGPWTTEEDQKLVDYIQKHGYGNWRTLPKNAGLQRCGKSCRLRWTNYLRPDIKRGRFSFEEEETIIQLHSILGNKWSAIASRLPGRTDNEIKNYWNTHIRKRLLRMGIDPVTHSPRLDLLDISSILNASFYGMQQYSLVNPELLRLASSIISPSQQHKDLDMCAQKGQQSQLCDPQIQNHAPHVVQFQDPVQEVPECTMFSTPCVSLPLTQPQLVEDPYPSSSFTDFRYQQHSHDHLSDWHENGIALSTLTDDCIPPLSSYNYYNSDSQNLMYPPPSEPSIFHSNNSNQNFSFASVLSTPSSSTTPLNSNSTIINGGNTEDERDQSYDSSNMLKFEIPDILDVNEFM*
A34	SsMYB13	evm.model.Chr1.3706	92486796	92488283	3	340	7.5	37885.5	Nuclear	MGRAPCCDKANVKKGPWSPEEDAKLKSYIEQHGTGGNWIALPQKIGLKRCGKSCRLRWLNYLRPNLKHGGFSEEEDNIICSLYVSIGSRWSVIAAQLPGRTDNDIKNYWNTRLKKKLLGKHRKEQQARNKGNGVVKQVNSSSPLLQENSSQQQPYWPQIPVLPYTNQSPGFNDQDSIRKLLMKLGGRFSDDYQPALDGLCLQFPHGSLSSIQQIQEEQVHVGSSGCVNSVGNNQVLFGESNEYCAELVQGQGSFATAAIGETVSSNDYSQRLLGGLEFFYGEEMITDRIMGASSSCWQSTNWGETSSLMYPPLVASNYEGVRQEMPRECAFQDLSYPGPQ*
A1	SsMYB14	evm.model.Chr1.3788	94060620	94061982	1	273	8.93	29656.3	Nuclear	MASANKDVDRIKGPWSPEEDEALRRLVQTYGPRNWSVISKSIPGRSGKSCRLRWCNQLSPEVEHRPFTAEEDETIVKAHARFGNRWATIARFLNGRTDNAIKNHWNSTLKRKCSEPLSEPRPRKRSATGSGGPSSGSDLSDSGLPATVSPTPIQVYKPLARSVSVTLAPSTETASSVTDPATSLSLSLPGSDSCDGSNNGPGPNQGSSCDPAQEVMLSSEKQLFSAELLKAMQEMIRVEVRNYMSGLERNGVCMQTEAIRNAVVKIMGIGRVE*
A1	SsMYB15	evm.model.Chr1.3866	95454016	95455660	1	225	8.84	24689.3	Nuclear	MEAMNRSSSSTTSSSDSCSSESNHRNPNKPDRIKGPWSAEEDRILTRLVERYGPRNWSLISRYIKGRSGKSCRLRWCNQLSPAVEHRPFSAQEDETIIAAHAQYGNRWATIARLLPGRTDNAVKNHWNSTLKRRAKGGGVVNVGANEGGTSSSAPSRPFEDDPLTALTLAPPGVGNGAVAEDAVPDHRPSPESAPPGFWDMMKDVIAREVREYVSSNFSDNSGFH*
A22	SsMYB16	evm.model.Chr1.4261	102570007	10257104	2	256	8.78	28390.2	Nuclear	MGRSPCCEKAHTNKGAWTKEEDDRLIAYIRAHGEGCWRSLPKAAGLLRCGKSCRLRWINYLRPDLKRGNFTQEEDELIIKLHSLLGNKWSLIAGRLPGRTDNEIKNYWNTHIRRKLLSRGIDPATHRPLNDDASHHNQVQEPAATATVSFAPPAPKQEEKDNVFVEIMDSKGPTSERCPDLNLELTISPPHQPDQPLKSVGRGLCFACSLGLQNSKDCSCGVNANLGNTSSGNGAAGYDFLGLKTSVLDYRSVQMK*
A5	SsMYB17	evm.model.Chr2.131	7539067	7540972	3	302	5.88	34616.1	Extracellular (Secreted)	MEREFDGGYIKKGPWSSEEDEVLLRHVSKYGPREWSSIRSKGLLPRTGKSCRLRWVNKLRPNLKTGCKFTAEEERVVIELQAEFGNKWAKIATYLKGRTDNDVKNFWSSRRKRLERMLKRPPTSKPQKNKGKTPLNQVQVDQKVPPCSSNQVEEIPSYPTSYMGNTEVYEMVNLPDLIKPNYQHFESDHLSAVEVEATPLHTVPSFESSSGYNFPLVPEPLMDFPLFPECQDLVPEPFDPSFIDGFEEKKCSECVCSQKLGTRLPSLGLEGNSQSTSSYGLFNDFPTEIFEYFEHIPTSSEQ*
A28	SsMYB18	evm.model.Chr2.1456	58719202	58720256	3	226	7.73	26143.7	Nuclear	MGRSPCCDEIGLKKGPWTPEEDQKLIDHIQKYGHASWRALPKLAGLNRCGKSCRLRWTNYLRPDIKRGKFSQEEEQTILNLHAVLGNKWSAIASHLPGRTDNEIKNFWNTHLKKKLIQMGYDPMTHQPRIDDIFSGLSHLLALANLKELLDLHHQPWEQNLARLQEETIQLARLQCLQQQHLLQPQASTEADPNTRNSMNSTFMNKDTINVSNDVSHDQFENYYAI*
A32	SsMYB19	evm.model.Chr2.1610	63089410	63092983	3	421	8.01	47127.2	Extracellular (Secreted)	MGRSPCCEKTGLKKGPWTPEEDQRLISFIEKHGHGSWRALPAKAGLRRCGKSCRLRWTNYLRPDIKRGKFSLQEEQTIIQLHALLGNRWSAIASHLPKRTDNEIKNYWNTHLKKRLDKMGIDPATHKPKIERLGPTKDGSNLSHMAQWESARLEAEARLARESKLQEKNNLRPSTRLVLNKITPQQPSLPPCLDVLKAWQSSWSNNSSKSSLNDKKNMMHVHSTCAMMLATDDLESPTSTLYFPESTVQMNSNNTNAMVSSSTNPVRLINGNYLLPPTTITTTGSLNEFITKSLGACGEGAIVKEAARESESWGYLTKHSNEELAEIERRIMYDTMPCLQDDDIMVAVEALRGAGYGNNNVTFTSLSGNVMVGFNNDHVPDFDSNEDLVAENLDVINGD…
A32	SsMYB20	evm.model.Chr2.1612	63209379	63210520	3	304	8.25	34112.8	Nuclear	MGRVPSREKEGLKKGPWTPEEDKKLVAYVEKHGPGNWRSVPAKAAGLERCGKSCRLRWINYLKPDIKRGNFSMEEDCTIIQLHALLGNKWSIIAAHLPKRTDNEIKNYWNTNIKKRLIRMGLDPITHKPIKPNTFEAYAGDHDQSKDTINMGHVVQWESARLEAEARGSILQVGSASLHLPRLVLSKIPTQPSSSLDSLSTEHKRVYNMYALVLTTNHDLRSSVSTLSIPKLPAVSTNIGQFTDTESSHGNVTETSSQIQKTMEGYVSNLEDDDIMMAVEAFRTARCESIQELFNESTAMEGLI*
A3	SsMYB21	evm.model.Chr2.1631	63570057	63572320	3	404	8.33	45801	Extracellular (Secreted)	MGIMAYADMMGSLSLASNYATLSNASSSQESYGYASGVENGRTTSWTFPFMREFLSSNFEDCSDVGVGESNSSEKIKHSEKFNEETNPNENLVSGKEVDSGHSKLCARGHWRPAEDAKLKELVALYGPQNWNLIAEKLEGRSGKSCRLRWFNQLDPRINRRAFSEEEEERLVQAHRIYGNKWAMIARLFPGRTDNAVKNHWHVIMARKYREQSSAYRRRRMNQSAYRRVEQNPSFLCSRDNASTTEPEPSPSYCPNLLHNGVALTNNMPSFPSFHGVAAGVVEFGLNGSPQNMNGGREAMSNTPHVGLCAQQAPFAFFSGGRSSDMMGESTSQIRCRERTNESHNHHSQISGFYLHYPQQYLMAMQQLDNNNHNNFYRFLEFLLSINNHSQGTIIITIC…
A6	SsMYB22	evm.model.Chr2.1635	63706963	63709016	6	347	6.22	38412.2	Extracellular (Secreted)	MDLQNMQNQSMHFVLSTDAKPRLKWTPELHQRFIEATTQLGGADKATPKSLMRVMGIPGLTLYHLKSHLQKYRLGKSQQLETCSNNKQEDYIETKSSDGHCSREISLGAQNQITENMQIAQALQMQMEAQRKLYEQIEVQKHLQLRIEAQGKYLQSVLKKAQEALAGYNSSPVGIELTKAELSQLVTIINNACPSSPISELTETRGVSLNCGERKRDTGTMCSLESSLTSSESSGGKEEKQPMEETGDFKSSNNVSLELPLMDTHTEDKASNGGSSNEASGRKRSAATKSDDGSCVVEQPCGKRCGNKLRKAKLSEMLDLNSQCQSDMDSTSSKTFDLNCSLNFWEP*
A8	SsMYB23	evm.model.Chr2.1675	64740011	64747412	1	416	5.61	46999.8	Extracellular (Secreted)	MFCELQEDDILREQISIHGTENWAIIASKFKDKTTRQCRRRWYTYLNSDFKKGGWSPEEDMLLCEAQKIFGNRWTEIAKVVSGRTDNAVKNRFSTLCKKRAKYEALAKENTTSYINSNNKRILLQHGCDTDGASESAVAIKKMRRSHIPDAAEKINFGDRSHKQNGIPINQQPRAPFAVLAQNSRNVNLPDQHHVCNLKFSDYAQNNKIQGTFLKKDDPKISTLMQQAELLSSLALKVDAENMDQSLENAWKVLQEFLNRTKESDIPRYKIPDLQLVDLKDLLEDLKSSSEEIQPCWRQMELYEDSPGSSDYSTGSTLLPHSAGENLEHSLHQDVGTELNIQIVDPKGVRGCDQRVLSSATLDQDLFPSCEEQINNDGIVSALSCLEEFSSPLQVTPLF…
A30	SsMYB24	evm.model.Chr2.2005	72110894	72113296	3	343	6.09	38384.2	Nuclear	MGRSPCCDESSGVKKGPWTTEEDEKLIDHISKHGHGSWRTLPKRAGLNRCGKSCRLRWTNYLRPDIKRGKFTDEEERIIINLHSVLGNKWSKIAAHLPGRTDNEIKNYWNTHIRKKLLKMGIDPETHKPRTDFNHLMSLSQLLGMSNLSSGMNTTWGNNPLGLQADITQLAKIQLLQNLLQLMNSNSFVNMGNGNPYLLGNPNLNPMFFSGTNPLQTKEPVVLSGEVYANPGVYSQAQSECSQQDVSKSWADVEGGSNPQDPDYNKISSTTSPENQAENPLPALVAGSPRMGTFSQMDNGCNMAQMSTESPSNTIFDDWEKLLDDETNGSYWKEILDLTPIMW*
A6	SsMYB25	evm.model.Chr2.2074	73530240	73533207	6	269	8.38	30292.1	Nuclear	MEGGGREGYNGVVMTMTRDPKPRLRWTGDLHDRFVDAVTKLGGPDKATPKSVLRLMGLKGLTLYHLKSHLQKYRLGQQARKQNEELHKENSRCSYVNFSNHSSGPNTSYRGDNEGGEIPIAEAMRCQIEVQKRLEEQLEVQKKLQMRIEAQGKYLQAVLEKAQRSLSLDGPGSLEASRAQLTEFNSALSNFMENMNKDSKENVIQVNDFYSKIHGSVFHYQEVGREENRDQKPKVEGGSIQFDLNIKGSNDLVSAGGAEMEANIISYRV*
A1	SsMYB26	evm.model.Chr2.2591	84284145	84286431	1	310	9.27	33538	Nuclear	MNTGTGVSRKDMDRIKGPWSPEEDDALQKLVEKHGPRNWSLISKSIPGRSGKSCRLRWCNQLSPQVEHRAFTSEEDETIIRAHARFGNKWATIARLLHGRTDNAIKNHWNSTLKRKCASMMMDDPQPLKRSVSAGAAIPVSTGLYMNPPTPGSPSGSDVSESSVPVASSSHVFRPVARTGGVLPPVETTSSSNDPPTSLSLSLPGVDSSEVSNRTTEPIHAAPPPPQAPSITIPLLPMMAAPVAVPPVSPTGSGAFNLSAEFLVVMQEMIRKEVRSYMERQNQNGMCFHAADDGFRNASVKRIGISRIDS*
A1	SsMYB27	evm.model.Chr2.2592	84338363	84340650	1	310	9.27	33538	Nuclear	MNTGTGVSRKDMDRIKGPWSPEEDDALQKLVEKHGPRNWSLISKSIPGRSGKSCRLRWCNQLSPQVEHRAFTSEEDETIIRAHARFGNKWATIARLLHGRTDNAIKNHWNSTLKRKCASMMMDDPQPLKRSVSAGAAIPVSTGLYMNPPTPGSPSGSDVSESSVPVASSSHVFRPVARTGGVLPPVETTSSSNDPPTSLSLSLPGVDSSEVSNRTTEPIHAAPPPPQAPSITIPLLPMMAAPVAVPPVSPTGSGAFNLSAEFLVVMQEMIRKEVRSYMERQNQNGMCFHAADDGFRNASVKRIGISRIDS*
A34	SsMYB28	evm.model.Chr2.2663	85591462	85593120	3	347	6.1	39560.4	Nuclear	MGRAPCCDKANVKKGPWSPEEDAKLKAYIEQHGTGGNWIALPQKIGLKRCGKSCRLRWLNYLRPNIRHGGFSEEEDNIICSLYVSIGSRWSIIAAQLPGRTDNDIKNYWNTRLKKKLLGKQRKEQEAQARQVNNPQKQDVKRETENLIVASEVINQVPYWFAEYSSVPMPVTNNPSFQQHYDLYNQTSLRNLVVNKLEGIRFCNDHHHQQQPYTNACEIPSPPDHVFPTPMNMVNHVAVVSNENNSGTYQPSNIFEGFENFPNDFCELVCANPKQMDRSMEGFNYGMESMDMSNGGSTNTTSTESTSWGDMSSLVYSPLVSDYEVCRQGIPQDVAFEECKYFGMQMQ*
A13	SsMYB29	evm.model.Chr2.2788	87711950	87712966	4	213	8.86	24342.8	Nuclear	MMSPLTFQALQLQSMTVPAKPFTRYCLSLSFMAPPKNDETAKKTNNRGAWTAEEDQKLAQCIEIHGAKRWKTVAIKSGLNRCGKSCRLRWLNYLRPNIKRGNISVEEEDLIIRLHKLLGNRWSLIAKRLPGRTDNEIKNYWNTCLCKKVNHTKEKPETSTAQPTHMTQNTGETAAVENKEAIDDGSGDSEVNFDVNEFFNFSMEGLYALDWMI*
A33	SsMYB30	evm.model.Chr2.2838	88533701	88535746	2	267	5.84	30181.2	Nuclear	MGRQPCCDKLGVKKGPWTAEEDKKLINFILTNGQCCWRAVPKLAGLRRCGKSCRLRWTNYLRPDLKRGLLTQAEEQLVIDLHARLGNRWSKIAARLPGRTDNEIKNHWNTHIKKKLLKMGIDPVTHEPLNKQVSSQDSSSPAEHLPQADNTHQVEKNDGVLNSEENSTSSPAENSSGEESLLVDSICKNGSLMNSMWLDETPLMDTLWDITPKVENTNYDMGLPMWEDNCAWLLDCQDFGIHDFGFNCFSEIESSTLQTIGMDRKGP*
A20	SsMYB31	evm.model.Chr2.2951	90107285	90109617	3	318	5.38	36179.5	Nuclear	MGHHSCCNQQKVKRGLWSPEEDEKLIRYITTHGYGCWSEVPEKAGLQRCGKSCRLRWINYLRPDIRRGRFTPEEEKLIISLHGVVGNRWAHIASHLPGRTDNEIKNYWNSWIKKKIKKPSMPSSITTTQSVDDHPQFNYNFNQLDHFANQENVTTARPPVQETLFSSTCPLFMFDISSLDQGTTTIDTNVRAELFQDSLGLSSETWNLSHHQVHALPPQPAAGAAAVMDTTNYLPPLIENVDNMVPNIEVQSCSIDEEGEMALECLRRQELNEWVENQQQCPSFLFWDNVEGQLGGEELAPNTSNMGTNSLSPFPSFF*
A28	SsMYB32	evm.model.Chr2.3104	92031094	92032991	3	357	6.21	39757.4	Nuclear	MRTPSSDDSGLKKGPWSPEEDKILVDYIQKHGHGSWRALPKLAGLNRCGKSCRLRWTNYLRPDIKRGKFSDEEEQLIINLHAVLGNKWAAIASHLPGRTDNEIKNFWNTHLKKKLLQMGLDPVTHRPRTDHLNLLSNLQQILAAAKIVSSFTNPCDINNALRLQSDATQLAKLHLLQNIFQVMGTTPSPSSNSDPLNPFGSLNSLPDGLLNDVLGLNNFNLQNLYDGSVGFSSQIQPNIFQNFEATQQPTQAGRNQHLNGGRNSSFMESQKFDEQFGSTNADPSSSNSLPNLVSASPERSPVKEAENMVNSKECSNSNPCSTTFELTWGDFMDEEATETCWKGFIDQHSNQPWSTVP*
A9	SsMYB33	evm.model.Chr2.349	21574637	21579358	3	554	5.19	60883.7	Nuclear	MRRMNKEIEDELLPNDQSGAQLNDEGYEGSAGVVLKKGPWTSTEDDILVDYVKKHGEGNWNAIQKHTGLLRCGKSCRLRWANHLRPNLKKGAFTAEEEQLIAELHAKMGNKWARMAAHLPGRTDNEIKNYWNTRIKRRQRAGLPLYPPEVCLQALQESQCSQSSGGLNGGNKMHPDFLQKNSYEIHDAIFDSLKDNQGILPYVPELSDISVYGNMLKGLDSSQYCSFVPPTSPKHKRLRESTIPFIDSSDMNRIGLYPFDQIWDNDSDKIAQSFGMQAPLDPGPSSHSSICYSHSLSNGNSSTSKPTYEAVKLELPSLQYPELDLGSWGSSPPPPLLESVDDLIQSPMPISTLESDCSSPQNSGLLDALLCQAKTLSSSKNHNSDKSSNSSTATPGDRA…
A6	SsMYB34	evm.model.Chr2.492	27044407	27047412	6	351	8.88	39155.8	Nuclear	MERMFPPKKPSTMNSHDRPMCVQGDSGLVLTTDPKPRLRWTVELHERFVDAVAQLGGPDKATPKTIMRVMGVKGLTLYHLKSHLQKFRLGKQPHKDFNEHSIKDGMRASAIELQRNIGSSSAMIGRNMNEMQMEVQRRLHEQLEVQKNLQLRIEAQGKYMQSILEKAYHTLAGENMATDMKGIGGPQGTPDMGVMKECGSLNFLSFQDLNIYGSDDQLDGFMPTNNESLFMGKKRPCPYSGSGKSPLIWNDDLRLQDLGTASSCISPQDDPFKGDHKVHISPPSMDSDPMSEIYDAKPVVRPVQSVGDQKKFDASMKLERPSPKRSPLQPERTSPMINASSVAQGRSSPFG*
A19	SsMYB35	evm.model.Chr2.62	5414547	5416881	5	313	6.07	35448.1	Nuclear	MRKPDLMANKDKMNNIKSKLRKGLWSPDEDEKLIRYMLTNGQGCWSDIARNAGLQRCGKSCRLRWINYLRPDLKRGAFSPQEEDLIIHLHSILGNRWSQIATRLPGRTDNEIKNFWNSTLKKRLKTNTSTPSLNNSTDSSESKDVLSGILPFNEHDIMTMCMDSSSSISSMQAMVLPDQFDPFSMLVNNQCHMTNVSADFPNMPACLTQIGMVDGHQGNYGIMEPNKMGLGRDFSLPSLESRSIESNGVPIDVKSHNNHFNYDSFNNTDKIQGSKVEDLIGIGNHGQGENFKMGEWDLENLMQDITSFPFLDF*
A5	SsMYB36	evm.model.Chr2.902	44579381	44581405	3	311	5.51	35379.7	Extracellular (Secreted)	MHGKKDQEEYIRKGPWKAEEDEVLLSHVKKYGPRDWSSIRSKGLLQRTGKSCRLRWVNKLRPNLKNGCKFSLEEERVVIELQAQFGNRWAKIASYLPGRTDNDVKNFWSSRQKRLARILQTSATNPTSQKNKTKVPTVLDVATLEAPKFSSSSEGEPSSKPQSSSLPFIENSEFIKMVSLPDLIKSELPSSDTSHLEQEFTLFENYRSTEQIDFPQIPELHNDLTLPMESQDHLARIDEPCFIEDFGPLDASEFGIGPQHPLGFPFFEPPGSCRIGPRDAIDNCKNSDSFFDDFPVDMFDHMESPASPSNL*
A6	SsMYB37	evm.model.Chr3.1116	26211913	26216307	6	237	9.56	26745.6	Nuclear	MGSSRSRGSATAKERLRWTQELHDRFVEAVNRLGGPDRATPKGILKVMKAMGVSELNIYHVKSHLQKYRISKLIPESPTRGKLEKRSISDILPNFSSISALQLKEVLQMQTEMQNRLSDKTEAQRSLKLKIEAQGKYLERIGQSNHSKTIIEKACKPFVAKIAPLPSLSEESKSLETQPEEEHQSAKRQRVVEEGVFTTSFEHASSTPPEFYNQTWNLSWSQLAAACQSPLVPSFLL*
A7	SsMYB38	evm.model.Chr3.1175	27658571	27661680	2	286	8.91	32856	Nuclear	MNRGIEVFSPASYLQNSNWLFQESKGARWTSEENKLFENALAYYDKDTPDRWMRVAAMIPGKTVGDVLKQYRELEEDVSVIEAGLIPVPGYTTSPFTLEWVNNQGYDEFKQFCSVGEKRGASTRPSEQERKKGVPWTEEEHRQFLLGLKKYGKGDWRNISRNFVTTRTPTQVASHAQKYFIRQLTGGKDKRRSSIHDITMVNLQETKSSSSDSTRPSSPLLNQRLSSTVKPEYEWKLPCEGMPIVFNSTNGNMLMATPLHGISSYESRPQEHNLLRQSQWMPVFTL*
A9	SsMYB39	evm.model.Chr3.1320	32454325	32457369	1	356	9.37	40401.1	Nuclear	MKDRQRWRAEEDTLLRAYVKQYGPREWNLVSQRMNTPLNRDAKSCLERWKNYLKPGIKKGSLTEEEQRLVINLQATHGNKWKKIAAQVPGRTAKRLGKWWEVFKEKQQRETKGNNCTIDPINDSKYEHILESFAEKLVKERPSPSFVMASSNSSFLHTDAPAPAPALLPSWLSNSNGTAPVRPPSPSVTLSLSPSTVAAPPPWLQTVRGPENAAPLVLGNVAPHGAVLVFGENMVMSELVECCKELEEVHHALAAHKKEAAWRLSRVELQLESEKAGRRREKMEEVEAKIKALREEQTAALDRIEAEYREQLAGLRRDAESKEQKLAEQWAAKHLRLTKFLEQVGCRSRLSEPNGR*
A24	SsMYB40	evm.model.Chr3.1978	62060559	62064929	3	471	4.61	53960.7	Extracellular (Secreted)	MARTPGLNKNGQKKGTWTPEEDKKLIDYVTRYGHWNWSLLPKFAGLARCGKSCRLRWLNYLRPNLKRGNYTQEEEETIIKLHRNLGSRWSAIAARLPGRTDNGIKNYWNTNLKNRSQQDSKAQVFKSKDQSPTEPTANPFQSFHTTQDSSPFFNHSSSSTSIEYTTVTGNENQALEEYTSVTNNENLVLEHESAFGDEDTDLMNGNFSLEPYMLDISYVPSEPEYFSPVFDAELWSHDNTTQDSSPFSQHSSNSTSPEYTTIHGNENLVLEEYTTVPRKENLVLEDEFSFWDLETDLMSENFWLEPYILDISYIPSEPKYFSLVFDAEHWSHDNTTQDSSPFSHHSSFSTSTENSTVTSNKNLVLEDEFSFWDAGTELTSENFSLEPYIPDISYVPSEP…
A24	SsMYB41	evm.model.Chr3.2000	63152858	63156289	3	275	4.99	31528.7	Nuclear	MARTPGLNKNGQKKGTWTPEEDKKLIDYVTRYGHWNWSLLLKFAGLARCGKSCRLRWLNYLRPHLKRGNYTQEEEETIIKLHRDLGNRWSAIAARLPGRTDNEIKNYWNTNLKNRSEQDSKDQSPTEPISNPFQSFHTTQDSSPFSQHSSSSTSTEDTIVTGRENLVLEDEFAFWDADTDLMSGNFSLEPYMLDISYVAPSEPEYFSPVFDAKLWSHDKTTQVSSPFSQHSSSFTSTEFTTVTSNENLVLEDEFAFWDADTDLMSGIEPSVHDIS*
A24	SsMYB42	evm.model.Chr3.2005	64198961	64202769	3	291	5.04	33703.1	Nuclear	MVRTPCSDKNNGLKKGAWTPEEDKKLIDYITRYGHWNWRLLPKFAGLARCGKSCRLRWVNYLRPDLKRGDYTQEEEETIIKLHRDLGNRWSAIAARMPGRTDNEIKNYWNTNLKNRSQQDSVTKAQVSKSKDQSPTEPTANPFQSFRTTQDSSPFSQHSSSSTSIEYTTVTSNQNLALEDEFAFWDAETDLMSGNFWLEPYIPDITYVPSEPEYFSPVFDAELWRDDDRICFHTTQDSFPFSQQSSSSTSKEYTTVTSNNNVVLEDEFTLWNADLDTKRKASTMEELNLDS*
A29	SsMYB43	evm.model.Chr3.2228	71045988	71047423	3	323	5.79	35856.6	Nuclear	MGRVPCCDKNELKKGPWTPEEDLKLTNYIQIHGPGNWRSLPKNAGLQRCGKSCRLRWTNYLRPDIKRGRFSLEEEDIIIQLHSILGNKWSAIAARLPGRTDNEIKNYWNTHIRKRLLRMGIDPVTHAPRLDLVDTSSILRSVLLGNPSLLNMQGLLGAQVLMNPELLNLAATASLLSIKNNENPNLASQNYVQQSQVTPPLDLTQFQMPMEGFSGTMANLSCSSSSPLSSTPSGENHVLQQNQVDLLGNPALVQSLNNANQNMGYDSVLPTPVSSPNQLNSSSTYVRSGTEEERDSFCSDLFEFEIPEGLDIADIFCNVPQTN*
A24	SsMYB44	evm.model.Chr3.2235	71228012	71229553	3	225	6.09	26183.1	Nuclear	MVRAPYFDKNGIKKGAWSEEEDKKLIAYVERYGHPNWRQLPKFAGLARCGKSCRLRWMNYLRPNLKRGNYTQKEEQIITDLHKKHGNKWSLIAENLPGRTDNEIKNYWHSHLKKFLKGNENTPCDELKSKPSECTEFERPINDHHILESSVSVSSETSEDNSPSFSSSHTESTLNLSKEEESVASWETFDGFSSNFWTEPFISENALSQDYFPVSSYGTEPFFLW*
A24	SsMYB45	evm.model.Chr3.2236	71262213	71263791	3	231	5.61	26540.6	Nuclear	MVRAPFYDKNGLKKGAWGREEDERLRAYVQRYGHSNWRQLPKFAGLARCGKSCRLRWLNYLRPNLKHGNYTREEEEIIIKLHQELGNKWSLIAEKLPGRTDNEVKNYWHSHLKKSLKSNEITTSETHQFKKSESRGADVGDDFPYILESSLAMSTETSEGDNYPLTSNVAPSTMDSSLSKEDSVPPLVSYKEFSGDFWTEPFLIEDTYADETCSGEGIALLIPNFDDTYLL*
A24	SsMYB46	evm.model.Chr3.2237	71298871	71351579	3	318	5.46	35758.7	Nuclear	MVRTPSCDKSGLRKGTWTPEEDSKLIAYVTRYGCWNWRQLPRFAGLARCGKSCRLRWMNYLRPNLKRGNFTKEEEECIIRMHKKLGNRWSAIAAELPGRTDNEIKNHWHTNLKKRPQQNTLTNEEARASKSKEKVPNSGVTVTLPATSHISDNSGSLSPLSSSSSEFSSITSDHSTAASMENLVFEDDFGFLDAYNESFWSELNLDDISYNAPREIVSGDSNGAFQSTDSSQILDSCALSPHRSTSKSRVVDSDFGGFLDAYAEATVDNFWTQPYVADMAHVPSKLLVPSMAESEYFLPIYDDLWGQSDLYGENLSLF*
A24	SsMYB47	evm.model.Chr3.2238	71393462	71395633	3	227	6.18	26424.4	Nuclear	MMVRTPSCDKNGLKKGTWTPEEDKKLVDYITRYGHWNWRLLPKFAGLARCGKSCRLRWLNYLRPNLKRGNYTEEEEETIIKLHRHLGNRWSAIAARMPGRTDNEIKNHWHTNLKKRYQQDSFSVTRAQVSNSKSKDQSPTEPTANPFQSLHTAQDCSPSSSTSTEYATVTSNENLVLEDEFAFWDADTDLMSGNFWLEPYMLDISYVSSEPEYFSPVFDAELWSHDN*
A6	SsMYB48	evm.model.Chr3.2388	74346498	74348991	6	396	6.28	44087.7	Extracellular (Secreted)	MPIPSERHMFLQTGNGSDDSGLVLSTDAKPRLKWTPDLHARFIESVQRLGGADKATPKTVMKLMGIPGLTLYHLKSHLQKYRLSKSLHGQSNSATHKITINPGAATDERLRENNGTHMNNLNLAPQSNNKDLHISEALQMQIEVQRRLNEQLEVQRLLQLRIEAQGKYLQAVLEKAQETLGGQNLGVVGLEAAKLQLSELVSKVSSQCLNSAFSELKELQGFGPHQTQTNQPNDCSMDSCLTSCEGSQKEQEIQNGGMSLRPFNVHTFIERKEVMEGPNLNLPNTDLKWCDPVTKNTFLTLLSKHAERSPSNLSMSIGLEGETENGSNMFSEKTMVGEFQQRNTIRTESVKPLAEKVSQDYGMSSYFAASKLDLTTEDRDTTTSCKQLDLNAFSWN*
A34	SsMYB49	evm.model.Chr3.2496	76246071	76248497	3	317	6.7	35707	Nuclear	MGRAPCCDKASVKKGPWSPEEDTKLKEYIEKHGTGGNWIALPQKAGLKRCGKSCRLRWLNYLRPNIKHGDFSDEEDRIICSLYVNIGSRWSIIAAQLPGRTDNDIKNYWNTKLKKKLMALLPLSHHRKQPSFPSSSLQNPPPSPSPHQLYGEYCTYSPITTTFTSIEPLSLPSSNYASPTTSVSHPFYQSQDTMASISPMQCYYPIKDSMLMFGSEGSCSSSDGSCTQGREIKQEEIGYHSYNDNIMLGYTSINDGGENVNQYGEKSCVGGCFSQTLTPFDYDLKDIKQLISRSSSTSFNNVDENKTEEEAMYHYYY*
A12	SsMYB50	evm.model.Chr3.2641	79427888	79428914	3	232	8.99	26762.3	Nuclear	MIQQEIRRGPWTEQEDYKLLYFVNMFGDRRWDFIAKVSGLNRTGKSCRLRWVNYLHPDLKRGKLTPQEEHLVMELHSKWGNRWSRIARKLPGRTDNEIKNYWRTHMRKKKAQEKKRAEAAASSPVSSSCQSSLSSNNHVVDSHASKEAGEESFYDTGGYDDMMGLIGINVGKDLQGGEKGYPMDDIWKDIVVSEENIYNLQPVYEGIVKRDATSLVHLQCLLRHGSTILLYG*
A19	SsMYB51	evm.model.Chr3.2728	80589880	80591874	2	326	5.36	36356.4	Nuclear	MRKPEASGKNNSNNNKLRKGLWSPEEDDKLMNYMLNSGQGCWSDVARNAGLQRCGKSCRLRWINYLRPDLKRGAFSPQEEELIIHLHSLLGNRWSQIAARLPGRTDNEIKNFWNSTIKKRLKNLSSTTSPNASESSYEPNKDLNVTGFNTSSNTQDQHADFMPMFNSSSPSPSMHATVLNSIIDRLPMLEHGLNMPAAGGFFNGTGPCFSQSGVDNKGFYLENGGVFASVNIGAEGEMYIPPLESVSTISDHNLKVESTCNTDTNNSYFDDINSIIVNNCNISNNKRAENRAGGENLFQEELTMGEWDLEELMKDVSSFPFLDFSN*
A22	SsMYB52	evm.model.Chr3.2990	84489380	84490619	2	247	8.86	27297.1	Nuclear	MGRSPCCEKAHTNKGAWTKEEDDRLISYIRAHGEGCWRSLPKAAGLLRCGKSCRLRWINYLRPDLKRGNFTEEEDELIIKLHSLLGNKWSLIAGRLPGRTDNEIKNYWNTHIRRKLLNRGIDPATHRPLNEAAAAAAAVTNISLGKQEQETSSSNGSVVKGSILERCPDLNLDLTISPPRQPEKNMERTLCFVCSLGLQNSKDCSCNVANAVTPNNTASASASAAAYDFLGLKTNGVWDCTSLEIMK*
A28	SsMYB53	evm.model.Chr3.3198	87567013	87568584	3	349	5.81	39006.7	Nuclear	MMGRTPCSDESGLKKGPWTPEEDRILVDYIQKHGHGSWRALPKLAGLNRCGKSCRLRWTNYLRPDIKRGKFSDEEEQLIINLHAVLGNKWSAIAGHLPGRTDNEIKNFWNTHLKKKLLQMGLDPVTHRPRSDHLNLLSNLQQLLAATNIVSNFTNTWDINALRLQSDATELAKIQLLQNILQVLGTTPATNLELLNPFGPSSSLPDGFLNEVLGLNQSKLQNLYNGSTGFPSQNQPSFQSFEAPHQQQALPTGYHHMNGGGNSSCMKSEKVDEQLDAPNSSSTPLNSLPNLVSASPEYSTVKQMENKVNPNECSDPSSTSTTFDMWGDFMFEEVSDAYWKDLMDQESNQ*
A28	SsMYB54	evm.model.Chr3.3203	87627536	87629108	3	349	5.81	39048.8	Nuclear	MMGRTPCSDESGLKKGPWTPEEDRILVDYIQKHGHGSWRALPKLAGLNRCGKSCRLRWTNYLRPDIKRGKFSDEEEQLIINLHAVLGNKWSAIAGHLPGRTDNEIKNFWNTHLKKKLLQMGLDPVTHRPRSDHLNLLSNLQQLLAATNIVSNFTNTWDINALRLQSDATELAKIQLLQNILQVLGTTPATNLELLNPFGPSSSLPDGFLNEVLGLNQSKLQNLYNVSTGFPSQNQPSFQSFEAPHQQQALPTGYHHMNGGGNSSCMKSEKVDEQLDAPNSSSTPLNSLPNLVSASPEYSTVKQMENKVNPNECSDPSSTSTTFDMWGDFMFEEVSDAYWKDLMDQESNQ*
A12	SsMYB55	evm.model.Chr3.325	5928381	5931191	3	292	8.21	33571.8	Nuclear	MADRTISNHIEEVKVKIMVAVMGSLASEKGWRKGPWTGEEDKLLSEYVSLQGEGRWTSVAKCTGLNRSGKSCRFRWVNYLRPGLKKGQLTPLEAEMIIELHAILGNKWSTIAKHLPGRTDNEIKNYWRTHFGKSEKSKHKKLEMQKAKVLKQSKQKQQQEQQPHEYDIKTTTSHEETKNETKSFETQNNKQQEVGFIYPTIIEHQYTVPSMHEGFSSTWPDTLADDGSWFSVWGFDEPQPQSIANYVNQFSKCAMPNQATFGVGGVSMQNHDTTFCFDDAFDNLFYGKDMFR*
A12	SsMYB56	evm.model.Chr3.326	5946301	5948564	6	227	7.1	26205.3	Nuclear	MVAVMGSLATEKGWRKGPWTGEEDKLLSAYVSSHGEGSWSSVANCTGLNRNGKSCRLRWVNYLRPGLKKGQLTPLEAGIVIELHAILGNKWSTIAKYLPGRTDNVIKNYWRTHFGKSEKSKHKELEMHTEKVLKQLKRKRQQEQQSQEYYDIKIMSHEETKNETKSFETQNNEQQEMGFVYPTIEHQYTVPSMHEGFSSTWSNTLADDDSWFSSWGFDEPQSFADYV*
A13	SsMYB57	evm.model.Chr3.442	9871707	9873486	3	178	9.96	20162.6	Nuclear	MEGSSGVRKGAWSKCEDDLLKACVQLYGEGKWHLVPERAGLNRCRKSCRMRWLNYLKPNIKRGDFSEDEIDMLIRLHKLLGNRWSMIAGRLPGRTSNGVKNYWNTYMRRKVNPHKEDNNVKQKEAESTIKPPEVIKPVPLALSKSSRGCKGNSLVVPKLVLVKQVQLHQGLGIGGKLC*
A32	SsMYB58	evm.model.Chr3.448	10117943	10121410	3	329	8.18	36745.8	Nuclear	MGRSPCCDKVGLKKGPWTPEEDQKLLAHIEEHGHGSWRALPAKAGLQRCGKSCRLRWTNYLRPDIKRGKFSMQEEQTIIQLHALLGNRWSAIATHLPKRTDNEIKNYWNTHLKKRLDKMGIDPVTHKPKNDALLPTEGHSKSAANLSHMAQWESARLEAEARLVRESKLCSSHSSLHHPLGTVPSPSSSAPTLNKPDAPPMMIPSSSRSLDHVATRVSDLESPTSTLSFSENNAAPVMTSVIEFVASSERGTVKEEEEWNKGYESSTHLGEYKDDVENSMPFTSSLHELTMTMATTWGSATSLLGPPLLVVHMHMHMYMLLRRDSPAFC*
A26	SsMYB59	evm.model.Chr3.477	10965578	10967395	3	358	9.21	39999.5	Nuclear	MGRPPCCDKEGVKKGPWTPEEDIILVSYIQEHGPGNWRAVPTKTGLSRCSKSCRLRWTNYLRPGIKRGNFTEQEEKMIIHLQDLLGNRWAAIASYLPQRTDNDIKNYWNTHLRKKLKKLQTGCEGSLGEGFPASRQIPRGQWETRLQTDIQTAKRALSEALSPEKPRCLSASNSNPSDSSSSFSSTRPAQSLCYASSAENIARMLKGWMKNPPKSSRTNSSVTQNSFNNLVAAGADTASSGAEGPSSAELSENFESLFDFDQSLESSNSDQFSQSLSPEATVLQGESKPDIGAEMPFSCLRNGFLMRLVVKRKLVVLMPSFSKLVHQSRFGLREKFFNPLVVDVYMFLLINMIIIILY*
A27	SsMYB60	evm.model.Chr3.768	18227591	18230417	3	308	7.19	34308.2	Nuclear	MGRTPCCDKKGLKKGPWTAEEDEILASYIKKNGGHGSWRSLPRMAGLLRCGKSCRLRWTNYLRPDIKRGPFTLEEEKLVIQLHGILGNRWAAIASQLPGRTDNEIKNLWNTHLKKRLKSMGLDPKTHEPLASSSSYPFHKAHASVSTRHMAQWESARLEAEARLSNESSRFTHTSNPNNNSFADDKATDSDYFLRIWNSEVGEAFRNVHHHKADDDNKITGSCHSPLSAGSSSNKCESVATNAELASNAQGTPSNTVKQEMEWKTRGSDSSSSNDMEDSSDTALQLLLDFPIDNDMSFLEGNSFVCPL*
A16	SsMYB61	evm.model.Chr4.110	1819513	1822216	3	276	9.3	31153.5	Nuclear	MGRAPCCSKIGLHRGPWTPREDALLTKYIQAHGEGQWRSLPKRAGLLRCGKSCRLRWMNYLRPDIKRGNITPEEDDLIIRMHSLLGNRWSLIAGRLPGRTDNEIKNYWNTHLSKKLRNQGTDPKTHKKLTEGPEKKKCKKKNKQKNENNKGSEKTLVYLPKPIRVKALSSIPRTDSTFTLDSNSASASTSQEKVQSPEAKKINMVLGVGNDGDNNGGIVFFGEDHDLVNSASYVECLSDVPTDHGTLEKLYEEYLQLLKVEEKPDELDSFAQSLLV*
A6	SsMYB62	evm.model.Chr4.1197	18988459	18993134	7	450	6.26	49779.5	Plasma membrane	MEARPAFSIERSSAKQLNNTGMSEALPSSLPLLPTPLEETYPKLSDSQPAFMEKELKTKPFTHSGHLSSSGAVGHMFSSSPGYSTDLHHSSFSSHEKHPRNTHFISQSLSNMASLPLSYSSNSGPIPSTTSTPYSNGNSVSWNTDSLPSFLDFPANTSVDNCRVESSACNIMATEEYSKRNDWQEWADQLISDDDPLTSNWNDLLADNIQDLEPKVSKSSSQLPIGHQSQSHQQLPASFGENRVGVAPSSSANSAPAKPRMRWTPELHEAFVEAVNQLGGSERATPKGVLKLMKVEGLTIYHVKSHLQKYRTARYRPESSEGAAEKKLSPIEERSSLDLKTGIEITEALRLQMEVQKRLHEQLEIQRNLQLRIEEQGRYLQMMFEKQCKSGIETFKASS…
A23	SsMYB63	evm.model.Chr4.1237	19568300	19570875	3	171	9.65	19284.2	Nuclear	MVGLSDWTDRTRQSTALQALSLKGASTLWKRSTGQSRRHASLFSIFLMVGLSNQTDQTGQFTALQMLSLKDSLGFEAEGVVIKMGRAPCCEKMGLKRGPWTPEEDQILINFINTYGHANWRALPKLAGLLRCGKSCRLRWINYLRPDIKRGNFTSEEEDAIINLHEKLGNR*
A6	SsMYB64	evm.model.Chr4.1425	23597798	23600841	6	411	8.31	45715.4	Extracellular (Secreted)	MNENKIDWGGLIQQSHGLSGDFNSEFGNRYCQYFDIRQAWNMGPLATVGGGAELLPNIGPAKSSGTIMSRFESPASAFYAAENCMGFAEYDCQVGIHSLSSQLCKINDLEFPLYQSPRETLVLDSANQPDPPNFDLSNTLQSIVKSQLNSNQCRRSPEKSNKISCENFPSSKFLPIEQQKLFIDGVIRGSSFPNKGNQDHMLRFSSQIEKLSPTLSAGSLSTTFGNSSSNGAVVSSKTRIRWTKDLHEKFVECVNRLGGAEQATPKAILKMMDTDGLTIYHVKSHLQKYRIAKFIPEPGPGKSDKRTHTKDVHHLDVKTGLQIREALKLQLDAQRCLHEQLEIQRKLQLRIEEQGRQLKKMFDQQQKTSNNLLNAQNSATDETTISHKDGEVSVAEGAN…
A6	SsMYB65	evm.model.Chr4.1669	28997460	29001603	6	272	7.86	29686.2	Nuclear	MYHAKKFSPASMVPHKAQGGAEQLANVGVLGGSAVKNAPPAGGSGKQRLRWTSDLHDRFVDAITQLGGPDRATPKGVLRVMGVPGLTIYHVKSHLQKYRLAKFLPESPADDSKDEKRNSGDSISGADSSPGLPINDALRMQMEVQKRLHEQLEVQKQLQMRIEAQGKYLQKIIEEQQKLGSTLTTSDLSHDKQNHPQSEASGSSDALASTLSPHKKQRIDDGSKDGFTASQLRKTAQKHDCNVGQLDPNLYHDAGFGFDLETKNDEDKESGQ*
A26	SsMYB66	evm.model.Chr4.1704	29821760	29823975	3	297	7.67	33424.2	Nuclear	MGRPPCCDKVGIKKGPWTPEEDIILVSYIQEHGPGNWRSVPTNTGLSRCSKSCRLRWTNYLRPGIKRGNFTPHEEGMIIHLQALLGNKWAAIASYLPQRTDNDIKNYWNTHLKKKLKKFQAALDPHSASDPTTSVQYLPKSFNDRISLDISSNNNHASSLRLSQSQSSTYASSTENISRLLEGWMRSSPKPLKGTQDEELQSNDDNNFESTKLVKCASVPALNLHLQHKRNKDEQEGGVDMVSHEEFDSILSFENLNNAAWDKSTCDSVAEKSSEAAAEFAHDIIAAERNRQKSENR*
A3	SsMYB67	evm.model.Chr4.1714	30025866	30028634	3	374	7.66	41043.1	Extracellular (Secreted)	MSSSHHFNVGESFSGDMSFFPSSLFVGSQTPPLSMGHGNGVEGPKSDMGLQILGPSMFQPQESRGTKRITDEMVENKNLCLKLGDEVEVKSPASGKNGYTKLCARGHWRPAEDEKLKELVAQYGPQNWNLIAEHLEGRSGKSCRLRWFNQLDPRINRKSFSEEEEERLLTAHKLYGNKWALIARLFPGRTDNAVKNHWHVIMARRQREQSSNVYRRRKPTTNEIIPKGLALTLSNNAASESTISSTIDESASTCTNLSLTPSSAKLTAFGLFDQPGPAQNHQAFGSLMGQSRGDVSFNKFLGAWNGACKAEPVGKLMGVDQSNFSDANSEVSVSESVATNRSNLSISEESETVGYKISMPFIDFLGVGATSLIC*
A23	SsMYB68	evm.model.Chr4.212	3609777	3611321	5	210	9.34	23404.5	Nuclear	MRTPCCERMGLKKGPWTAEEDQILISHIQRYGHGNWRALPKQAGLLRCGKSCRLRWINYLRPDIKRGKFSKEEEETILKLHEILGNRWSAIAASLPGRTDNEIKNFWHTHLKKRTEKSGVQNVNASSHILQEAQADSSNASSAAYSVAGNVMIANYGLSSRKNPPIVGTGFYGAVSSGTLGEIVGNHGSCQLSEEMEFWYNIFIKSGQPS*
A4	SsMYB69	evm.model.Chr4.2120	43358644	43361935	3	449	8.35	50750.4	Extracellular (Secreted)	MEFDPSFSEKIPYLSGIFPENHCIKSEIPIEENTIFMYQKNFSHLQHHPLNEPNHDPTAIFVTEGSSSIITPLFSLSSTTPSSGDSSSYKPTYPNESLRGGFANSYYPMPFAPNSNKVDPMQGHLNTNKGIWDFSQKIPFPCGASATSQPQVGPSLSPSLAFGSVTISCIIGTCNNAHKAVVVKMKQVQRKSNGKIQHKIANIIKGQWSAEEDRVLVQLVKRFGIKKWSQIARLLNGRVGKQCRERWHNHLRPNIRKESWSEEEDKMLIEAHKEVGNKWAEIARRMPGRTENTIKNHWNATKRRQNAKRQGKRTTSKGATTLLQNYIRQVTAAEEAEKELKKSMSKMNIKGESSCTNLGLFRVRYESSEGDFSSEDWGTQTEEDEVGWSVQHHVPLGDS…
A10	SsMYB70	evm.model.Chr4.2123	43611648	43615685	3	199	6.3	23287.2	Nuclear	MDKKLCNTSHDPEVRKGPWTMEEDLILINYIANHGEGVWNSLAQAAGLKRTGKSCRLRWLNYLRPDVRRGNITPEEQLLIIELHAKWGNRWSKIARHLPGRTDNEIKNFWRTRIQKHIKQAESFQQQSNYEINDHQACTSQVSTMAEPIETYYPPCYQGMLDPFSTQFPTNPDYSSCCTNDNNYWCMEDTWSMQLLNGD*
A10	SsMYB71	evm.model.Chr4.2124	43732719	43736101	3	199	6.52	23177	Nuclear	MDKKQCNTSQDPEVRKGPWTMEEDLILINYIANHGEGVWNSLAKAAGLKRTGKSCRLRWLNYLRPDVRRGNITPEEQLLIMELHAKWGNRWSKIAKHLPGRTDNEIKNYWRTRIQKHIKQAENFQQQSNSEINDHQASTSQVSTMAEPMETYSPPCYQGMLEPFSTQFPTIPDQSSCCTNDNNYWNMEDIWSMQLLNGD*
A9	SsMYB72	evm.model.Chr4.2173	48746490	48750020	1	357	9.58	40716.6	Nuclear	MKERQRWRAEEDALLRSYVKQHGPREWNLVSQRMNTPLNRDAKSCLERWKNYLKPGIKKGPLTEEEQRLVIRLQAKYGNKWKKIAAEVPGRTAKRLGKWWEVFKEKQQREKKEINRIADPINNSKYEHILESFAEKLVKVRPSPSFVMAASDGAFLHTDTPAPASALFPSWLSNSSSAAAVSPSSLSVTLSLSPSTVAAPPFSWLQPERGPDKAPFVLGNVAVLHGAVPALSDNMLLSQMVEHCKELEEGHHALATHKKEAAWRLSRVELQLESEKASRRREKMEEFEAKIKALKEEEKASLGRIEAEYREQLAALRRDAENKEQKLTEQWTAKHLRLTRLLEQLGCRAGLPEPNAR*
A9	SsMYB73	evm.model.Chr4.2174	48827525	48830626	1	353	9.36	40410.2	Nuclear	MKERQRWKAEEDALLCAYVRQYGPREWNLVSQRMNTPLNRDAKSCLERWKNYLKPGIKKGSLTEEEQRLVIQLQAKHGNKWKKIAAEVPGRTAKRLGKWWEVFKEKQQRKKQEINKIIGPVDDTKYDHILETFAEKLVKEHPSQSSYLMAASNGPFLHTVAPPPASSALLPPWLSNSSTNPSPAIRPTSPSVTLSLSPSTVPPPWLQPERGPGNATAPHGGSVPAFGDNMVVSELIECCKELEEGHRAWAAHRKEAAWRLRRVELQLEAEKVSRRREKMEEIEAKIKALWEEQNAALDRVEAEYREQLAGLRRDAESKEQKLVEQWNSKHMRIVQCMEQVGCRIPRIAEANGR*
A6	SsMYB74	evm.model.Chr4.220	3681454	3685948	9	422	5.12	46751.1	Plasma membrane	MSSSSRVLPTPVENKYMKPPDSFQLSPIKDMTANSASSNSIRSAGKMFSSPSECPDDIPFSSVSQHDRQYQDPPFVSQTLGDNVSSKIHSTTFISHPQESEDISWGPYPFQDIPGFPENVSVQHDQVENSACYINDDNVKRSDFGEWVDQLMSIDDSLHPNWSQLLGDDNVAEPKLKASQVPQQQHIPSGEVLCNSAATAPQTKPRMRWTPELHEAFVEAVNQLGGSEKATPKGVLNLMKVEGLTIYHVKSHLQKYRTARYKPESSEGTSDKKVTPIEEMKSLDLKTSKGITEALRLQMELQKRLHEQLEIQRKLQIQIEDQGKRLQMMFEKQREMGDSKGKGSSSSPLDEPSAAPSDTLLVPSPPVEISNEESDKFGSNGNIPKAMPEESSQDASPKQ…
A2	SsMYB75	evm.model.Chr4.2279	53533991	53541897	2	353	5.89	38020.8	Extracellular (Secreted)	MEPEEPAATALDAADGSGDEGLLGLGGGGGGRDRVKGPWSPEEDAILSRLVSKFGARNWSLIARGISGRSGKSCRLRWCNQLDPAVKRKPFTDEEDQIIVAAHAIHGNKWAAIARLLSGRTDNAIKNHWNSTLRRRGVELDKIKLESGNFMEDVSLEKAKASSEDTLSCGDVSLKSSDGRDVSSVEIMDDKYDDKAQTEGQLHHEVKDPPTLFRPVARVSAFNVYHSFDTVQPSTSIQGPVPMQGPILQSSKPDMEFCKMLEGICGDRSVPHQCGHGCCAAPKCIKSKSSLLGPEFIEFSEPPSFPNFELAAIATDISNLAWLKSGLESSSVKMMGSTSGRVVSNGSQVHIGN*
A27	SsMYB76	evm.model.Chr4.2795	70560929	70564699	3	279	7.6	31105.8	Nuclear	MGRTPCCDKMGLKKGPWTAEEDEILVSYINKNGGHGSWRSLPKLAGLLRCGKSCRLRWTNYLRPDIKRGPFTLEEEKLIIQLHGILGNRWAAIASQLSGRTDNEIKNLWNTHLKKRLMCMGLDPQTHQPLACSGNPNDKAHHASTSTRHMAQWESARLEAEARLSRESSSFANNKTDSDYFLRIWNSEVGESFRGVHKSENKSSCQSPISLGSSSYQCGSSSNPVGSSTPASIVKENLEWSERKTVSDSSSSSELEDSCDTSLHLLLDFPINNDMSFLE*
A16	SsMYB77	evm.model.Chr4.3015	76010153	76011322	2	287	8.55	32372.3	Nuclear	MGRAPCCSKVGLHKGPWTPKEDALLTKYIQAHGEGQWKSLPKKAGLLRCGKSCRLRWMNYLRPDIKRGNITPEEDDLIIRMHSLLGNRWSLIAGRLPGRTDNEIKNYWNTHLSKKLKNQGTDDTNTHNTLENPQQEPACGNKKKKNGGKKKNKQKNKGTNNAEPPKTQVYLPKPIRVNALYLPRTDSGTFTFDSNSASASTSQEKEESPMTKESNVVCGIGNEGESDGFGFFNVDHDLVNGSDNIECQSYFPTDHGTLQKLYEEYFQLLNMENSPFEMSSFEESLLE*
A14	SsMYB78	evm.model.Chr4.3190	79708626	79710086	3	295	8.44	33547.8	Nuclear	MGRSPCCSKEGLNKGAWTALEDKILTEYINIHGDGKWRHLPKRAGLKRCGKSCRLRWLNYLRPGIKRGNITNDEEELIIRLHNLLGNRWSLIAGRLPGRTDNEIKNYWNTNIGRKLQNGTPGYSIISGGARSTLNTVQQDHRNHKNQEWHYPYPPDKGSCLVQTKATRWTKVTVTKEITQQNEGIKSNVVDNKMKGFSMSPSSESNNDPVLHFMADLEMDGNFFSELLKMDLPESSCPENKILEDNGNPSTVEKGHLSPKSSSDTTHFPWGDSLYDTNFDFLPMTTFMESGFDWL*
A14	SsMYB79	evm.model.Chr4.3192	79783701	79785525	3	271	7.65	30749.7	Nuclear	MGRRPCCPKEINKGAWSREEDETLSKYVAIHGEGKWQKVAQNAGLKRCGKSCRQRWLNYLKPGIKRGDISLDEEDMIIRLHRLLGNRWALIAKRLPGRTDNEIKNYWNTNLSKKLQKQPISLSVSSLEHKRHEEEKTKLVHVAPEAPWPRRVKAVQYGKISENGGCDNRRSSTTPSTPSNKIEASSDEASFSDFLIDIDENQLLIADDSNSKFPQMEEDPHHNKEGLINSPSSSSPSDHCHSLLSEKLDPLETLLDVELKKMASFLGLEND*
A20	SsMYB80	evm.model.Chr4.3266	81523398	81525539	3	346	5.91	38936.6	Nuclear	MGHHSCCNKQKVKRGLWSPEEDEKLINYITTYGHGCWSSVPKLAGLQRCGKSCRLRWINYLRPDLKRGSFSPQEAALIIELHSILGNRWAQIARHLPGRTDNEVKNFWNSSIKKKLLSHDVIPPLATFSDFHSPCNIGSMESLFPLTANPNVILNFHHHQDQLYLPATPSPALQGFDHNNDIKTDINNYNPNFHHIQNPIPETVLPSSNPSSYEDTWSLGCVALHLNPNQENQITKSDTTSHYVVDKFTNPTALQQYECHLVEPLVPKVSESIEDYVCSMPYSSASQEQHEATEKFQCYPQDLTEAANQLEYIDALMSSLPSSTTSSSVSSSQIVTNPIIPSGWEP*
A18	SsMYB81	evm.model.Chr4.481	7653745	7655931	3	420	6.73	46665	Nuclear	MGRHSCCYKQKLRKGLWSPEEDEKLLNYITKHGHGCWSSVPKLAGLQRCGKSCRLRWINYLRPDLKRGAFSQQEENSIIELHAVLGNRWSQIAAQLPGRTDNEIKNLWNSCLKKKLRQRGIDPNTHQPLSEVENDKDKPLTSDKSNQKEVSLVEPPKPKPMERYPLEVSSYSKISSGNNSSGTPPTLDRFGTCHDSSITSSDMMGMGYFPIQHLNYGPNMGLTASTNTPLCFIPSCSTSSQMMSELNSTMLHSVFPTPVKPTVNNPSSISISSGDNVDGVQSWENSTISNSNHASKSNGSSSCSIQLQSSTNFLDSSTITWGLQAESAKAADKDAHSHVVPLPSEQEEIKWSEYLNTPFFLGTTVQHQTTNSIYGDEVKPESGFIADESSTSWHHSQHF…
A11	SsMYB82	evm.model.Chr4.554	8761639	8763185	3	273	6.25	30813.2	Nuclear	METEYMAGVHITRSLSENGSSTTYGSEEEMSITKGPWTEGEDSVLFNYITVHGEGHWNSVARYTGLKRTGKSCRLRWLNYLRPNVRRGNITLQEQLLILDLHSRWGNRWSKIAEHLPGRTDNEIKNYWRTRVVKQAKQLKCDVNSKQFRDTLRFVWMPRMLERIQAQASSNHAQTTLISNTQAHSDPCGATNPSLLLSEASSAVDVHAPSLSDSNASYNLRGGGSCSSYSAEEGTTLWQQREYSDIPGNGFGGADLWTDENICFLQQQLADDF*
A17	SsMYB83	evm.model.Chr4.604	9661952	9667329	3	390	5.15	44568.4	Extracellular (Secreted)	MGRAPCCEKVGLKKGRWTAEEDEILTKFIQANGEGSWRSLPKNAGLLRCGKSCRLRWINYLRADLKRGNFSVEEERIIVKLHASFGNRWSLIASHLPGRTDNEIKNYWNSHLSRKIYTFRGASNKEIITVPPKRKRGRISRWAMKKNKSYAQRGTEQSPKQIDTHQNNEAVPLPPTRTLESENLSTNVMDFMVLDPENEELVDGSSPGAHHKENNSTTQEGNIGTMLVQCLDGEKEINDDILVPCEQAINGGEVNDITDNCWLETNGGLSLFGEERKGIDVVGNERGDTCTSIMVSSDEDRECSVNHYHSLNREGGELHSSSSMASGLEDDNWDWESVVWWDHKNELVSWEHHENLLTWPWEDEDWEKDFQSFGEIHPETQNAMLDWFLP*
A34	SsMYB84	evm.model.Chr4.999	15830449	15832722	3	321	7.51	35631.7	Nuclear	MGRAPCCDKANVKKGPWSPEEDAKLKEYIEQHGTGGNWIALPQKVGLKRCGKSCRLRWLNYLRPNIKHGQFSDAEDKIICSLFASIGSRWSIIASQLPGRTDNDIKNYWNTKLKKKMMAMNPSPERKPQQITLLSILQSSTSSSPWSFRDSNNSYYHPQGSFTGSGSFSYSSSLASGINSSASADSFFQAQESFMEPTQKCQFKDSSNSIFVFGGEATATSCSSSDGSCNNQISHVIDPEFGYGEGCANHLYSGMEDTTQKLMFSNAGGSVSGWTDKQNGLWEHNPLDYGVEEIKQLISTNNSCNNFLFDEKKTEGRVMYY*
A7	SsMYB85	evm.model.Chr5.1056	32718813	32724066	2	295	6.87	31313.8	Nuclear	MTVDEVGSSSKWSKEQDKAFENALAIHPEDASDRWEKIAADVPGKTLEEIKHHYELLVEDVNQIESGCVPLPSYNSSAEGSTSHASDEGAGKKGSHSWNCNNESNHGTKASKSDQERRKGIAWTEDEHRLFLLGLDKYGKGDWRSISRNFVVTRTPTQVASHAQKYFIRLNSMNKDRRRSSIHDITSVNNGDVSAPQGPITGQTNGSAANSGGKSTKPAPPTPTAAPGLGIYAAPSIGQPIGGPLVSAVGTPVNLPAPAHMAYGLGAPVPGAVVPGAPMNMGLVPYPMPHTSAHR*
A8	SsMYB86	evm.model.Chr5.1267	41034047	41040024	1	475	6.84	53550.8	Extracellular (Secreted)	MQDMTQQHQKQQCNEESKKKERHIVTWSQEEDDILREQIGIHGTENWAIIASKFKDKTTRQCRRRWYTYLNSDFKKGGWSAEEDMLLCEAQKIFGNRWTEIAKVVSGRTDNAVKNRFSTLCRKREKYAALAKENSASYINSNNKKIMLQHYNNMDTTSESGVPIKKTRRAHIPDDAEKINFGDRSHLRNGTPTNQQPRAPFAVLTQNSHNINNLPDQHQVCNPKFNSFAQNNKIQGTFLKKDDPKISALMQQAELLSSLALKVDTENMDQSLETAWKVLQEFLNRTKESDIPGHKIPDLQLVDLKGIIEDLKSGNEESQACWRQVECYKDSPGSSGYSAGSTLLCQSAGDNLEHSLHQDIGTEMKSEQFGDEKGVGRDEKGILSTANVDQDMLSYCEEQ…
A33	SsMYB87	evm.model.Chr5.1326	42783928	42784989	3	280	5.53	32212	Nuclear	MGRQPCCDKVGLKRGPWTIEEDHKLMNFILNNGIHCWRTVPKLSGLLRCGKSCRLRWINYLRPDLKRGGFTETEEDQIIQLHSRLGSNTVKHIFRWSKIASHFPGRTDNEIKNHWNTRIKKRLKLLGLDPVTHKPIEQKEHTDEDTNKTNPQPCISGGSEENVEINSLDSDGTKEMTKTDGKREENKVTWDDTSELLNNFEMLCSQLDLGSWMSQENNTSTNSLCGSSVSLDDTSHLSVDESSYIQENSLQQWVDSMDSILSWDGFNPLNQDIFFLENRE*
A6	SsMYB88	evm.model.Chr5.1339	43243340	43244493	6	220	9.22	24888.5	Nuclear	MCKIKACVWFCPADAKPRLKWTPELHQRFTEAINQLGGAEKATPKGLMRVMGIPGLTLYHLKSHLQKYRLGKSQQLETSSDNKQQGYSEIQSNDSHCSKEISIGSQNQMTESLKIAHALQMQMEAQRKLHEQIEVQRHLQLRIEAQGKYLQSVLTKAQEALARHSSSTTGIELAKAELSQLVSIINNACPSSPISELTETRGLSLNLWREETRQRNHVFT*
A3	SsMYB89	evm.model.Chr5.1343	43420996	43423527	3	430	6.06	47828.8	Extracellular (Secreted)	MGMVYYADMDSLSLCSNYGVVSSHQDCYVSNGGTNWGLPFMRECLGRSNFEEHPNNSDGVEEGKGSDSSDDGGGEDSEKVNHNANNFNEENPNENSVSGSGHSKLCARGHWRPAEDSKLKELVALYGPQNWNLIAEKLEGRSGKSCRLRWFNQLDPRINRRAFTEEEEERLMQAHRIYGNKWAMIARLFPGRTDNAVKNHWHVIMARKYREQSSAYRRRRLSQSVYRRVEENNTTSSIVSRDTATAGTEPPPPYCLNLPNAGLANNNMASFPYAAAPFHGVVAPAGGVDYGLNGSPHMTAAKEAFSTTKLAPPHIALYPRQTPLDFFSGARSNEMMGEYCSQNRCWERPSDAPPHHQPSGFYTHYPQYLMLMHHQNNHNFYGFSNSTAQILGSEASLSS…
A32	SsMYB90	evm.model.Chr5.1349	43715379	43717537	3	412	5.81	45485	Nuclear	MGRSPCCEKVGLKKGPWTPEEDQKLMAYIEEFGHGSWRALPAKAGLQRCGKSCRLRWTNYLRPDIKRGKFSLQEEQTIIQLHALLGNRWSAIAAQLPKRTDNEIKNYWNTHLKKRLTRMGIDPTTHKPKTDALGGSGSCQSKDAANLSHMAQWESARLEAEARLVRESKLQVQNNLGSSSSTQPARLVLNKITTQQPSLPPCLDILKAWQSSWSKPQPATTKDNNTKVMHSMYAMMLSTDDTLESPTSTLCFPGTTTVLPVSTTTTTTNNNNNIGLFNENNNMLISLTTTNATTMDSGFVKGAGDDAMLHLQDDDIMAAVEEAFRATTGYDNNSNNIVPLTLSNSVVLEGLNNDDNALVYDSSDNLGTEEENLAIINGDGSLCNVNLEENNKHYWNNIF…
A22	SsMYB91	evm.model.Chr5.1506	47055820	47057773	3	227	9.16	25477.9	Nuclear	MRKPSCDIKELNKGAWSKQEDQKLIDYINKHGEVCWRTLPQAAGLLRCGKSCRLRWINYLRPDLKRGNFAEDEEDLIIKLHALLGNRWSLIAGRLPGRTDNEVKNYWNSHIRRKLIKKGIDPNNHRLNLKIPSLPSPPVSDDSSKPFGVKDISKNGTSKSPRVYNSGEVSDAASGEAESSCALPDLNLDLSVAIPSASPENNLTPFHESNSSRKLYFDSPSTLLLFQ*
A29	SsMYB92	evm.model.Chr5.1820	53406876	53407851	3	231	9.21	26484.3	Nuclear	MGRSPCCEKNGLKKGPWTPEEDQKLIDYIQKHGYGNWRILPKNAGLQRCGKSCRLRWTNYLRPDIKRGRFSFEEEETIIQLHSILGNKWSAIASRLPGRTDNEIKNYWNTHIRKRLLRMGIDPVTHRPRLDLLDLSSILSSSLYGSSQMNIQRLLGTQTVLNPELLKLASSLFSSQQREHLNMCAPNGEENQLCDPQIQNQIQHLVQTQDLAEEACKTALPSLKHSSLNPM*
A1	SsMYB93	evm.model.Chr5.209	4333164	4333994	2	226	8.55	25160	Nuclear	MGGNTMEATKRYSSSSSSSYSSASESTPRSENKNTCYKIQGPWSAEEDRILTQLVETHGPRNWALISRYIKGRSGKSCRLRWCNQLSPAVEHRPFSTREDEVILHAHARFGSKWATIARLLPGRTDNAVKNHWNATLKRRACQRRRFDADRDTSLGLEDDPLTALTLVPPGCACGGGGGGGEEDERRGVSPVGFWDAMRDVVAREVREYMSASFSDNLGFDEELSK*
A1	SsMYB94	evm.model.Chr5.296	6223459	6225091	5	268	9.64	29165	Nuclear	MASASREMDRVKGPWSPEEDEALQRLVQAHGPRNWSLISKSIPGRSGKSCRLRWCNQLSPEVEHRPFSPEEDEAIVRAHMRFGNKWATIARLLNGRTDNAVKNHWNSTLKRKCSAVSSDVSDRQPLKRSASVGAGRLNPSSPSGSDLSDPGLPAMSTPSGSAHCRPNLVETASSASDPATSLSLSLPGFGSGPNPIAMARLVSPPPPVATVDERGKQLFNAEFLRVMQEMIRKEVRSYMSGIEQNGLRMQTEAIGNAVVKRMGISNIE*
A20	SsMYB95	evm.model.Chr5.3142	78664633	78666984	4	350	6.1	39733.4	Nuclear	MEIWVPCMDPASGNTSHLGNKNTKEGKRRQHNKKPRNMGHHSCCNQQKVKRGLWSPEEDEKLIRYITTHGYGCWSEVPEKAGLQRCGKSCRLRWINYLRPDIRRGRFTPEEEKLIISLHGVVGNRWAHIASHLPGRTDNEIKNYWNSWIKKKIRKPSASSTTIAQSIDHNSSQFNYNSNLLDHFANQDNLQAKPQVQETLFSSTCPLFMFDTSSLEGTATDCNSTVRAEHFQDAVGLSTETWNLSHHQVQALPPLTVTVGLDTTNYLPPLIENVDNMVPIEVQSCTMDEQGDIALECLQRHELNEWVETQQHCPNFVFWDNVEGQLGGEELAPNSSNVEANTLSPFPSSL*
A34	SsMYB96	evm.model.Chr5.3287	81197966	81199781	3	250	5.98	27521.7	Nuclear	MGRAPCCDKANVKRGPWSPEEDETLKNYLKKHGTGGNWITLPQKAGLKRCGKSCRLRWLNYLRPHIKHGGFTDEEDQVICTLYATLGSRWSLIAAQLPGRTDNDVKNHWNTKLKKKFLAPNTNATGNTVCQFSTSTTPQRQAEDCVFDHENSAESHVLGLEQTPIPVPSPLPLGSDVSGLGSSCSVPVLSNDVSVLANSTSLAKNETQWFGYRDNEGEDEAFLLDFVYEDLLHNGFVSQDKSSEVPPSSG*
A11	SsMYB97	evm.model.Chr5.3420	83612862	83614702	3	316	7.2	36254.3	Nuclear	MSTSKSVSSSTEDDNELRRGPWTLEEDNLLAQYISNHGEGRWNLLAKRSGLKRTGKSCRLRWLNYLKPDVKRGNLTPQEQLLILELHSKWGNRWSKIAQHLPGRTDNEIKNYWRTRIQKQARHLKIDTDSSEFQELVRRFWVPRLLQKAKESSSSAMSIQNQTIPLPLDGVSQHSTIGTIPSRPPWQGPCMNEAGPTYLDQHEQNSDSEHNNGSCISFSESANIPKVSQHFGHTISQFHALNNNDFGTFTTYDGYHHVNNNAYEMDTFKTPTARVAEDVQYPIGDCQMAGSNWVNSDFACSVWNMDELWQFSKLQK*
A3	SsMYB98	evm.model.Chr5.3598	86551498	86553217	3	236	8.76	27354.2	Nuclear	MCSRGHWRPAEDDKLRELVEHYGPHNWNAIAEKLRGRSGKSCRLRWFNQLDPRINTSPFTEQEEDRLVASHRIHGNRWAVIARLFPGRTDNAVKNHWHVMMARIRRERSKQLYAKRPSHAPHQTNPHHNTNYDTITLPSSSDKPSYGKCSYTLLTHYPFQFTNNFHFQAPSSSSTMLQDKSQSVEFYDFLQVNTDSNKSEVTDNARRDDEEVNQNAEPSQSRDGVPFVDFLSVGGS*
A34	SsMYB99	evm.model.Chr5.372	7757199	7759274	3	365	7.58	40744.4	Nuclear	MGRAPCCDKANVKKGPWSPEEDAKLKSYIEKNGTGGNWIALPQKMGLKRCGKSCRLRWLNYLRPNLKHGGFSEEEDNIICSLYISIGSRWSVIAAQLPGRTDNDIKNYWNTRLKKKLLGKHRREPRNRGNYIKRESDVNRGSSDGDSSPLSLVQENSSTTQQQQQPCWPLNINMPVLPLPVTLPYADQGPCFNDQDSIKKLLIKLGGRFSGDYYHPTLDGLNLQFSDGQQNFQEQVHVGSSSSACIANNEVQFAQTGQYCNALGARVEDLVQGQGSNFTPSFEEMGSSSNYPDGLEFLYGEGIIDHKIIDSTVTTTRGQSATTNWGETSTPIYHHHHHHSLASNYQGQVVRQECALQEFSYPGAQ*
A7	SsMYB100	evm.model.Chr6.1116	18118961	18120675	2	299	7.37	32642.4	Nuclear	MSSSGTIWSYEEEKAFENAIAMHWIEEASKEQWEKIASAVPSKSMEEVKQHYQVLVEDVIAIEAGHISFPNYASEETTSSNKDFHGSSKATTSDKRSNCNYGSGFSGLGHDSTTHSGKGGLSRSSEQERRKGIPWTEEEHRLFLLGLDKFGKGDWRSISRNFVISRTPTQVASHAQKYFIRLNSMNRDRRRSSIHDITSVNNGDVASNQAPITGQHSSTISSSTMGVGGQSLKHRVQGHIPAGLGMYGTPVGHPVAAPPGHMASAVGTPVMLPHGPHPHPHPPYVLPLAYPMAPPTMHQ*
A26	SsMYB101	evm.model.Chr6.1272	20539159	20541538	3	311	6.59	35022	Nuclear	MYDMGRPPCCDKIGIKKGPWTPEEDIILVSYIQEHGPGNWRSVPTNTGLMRCSKSCRLRWTNYLRPGIKRGNFTEHEEKMIIHLQALLGNRWAAIASYLPQRTDNDIKNYWNTHLKKKLKQNDQNGTTDEGVDQWGHSSSSPAKGQWERRLQTDIQMAKQALCEALSLHKPATHHVVPDTKPSSSSHHHPPYNHASTPYASSYENISRLMENWMKSPNSNETNSPGYYSFSNVVNTTGSSSSEGAHSATTCTQDHAFDSLLTLNSSKHYGSPSETQVPLTILEKWLFDDGAAQCHEDPMNMSLEESTACLF*
A15	SsMYB102	evm.model.Chr6.1377	22428072	22429438	3	211	8.88	24123.4	Nuclear	MEGYRRESKKGFWNAEEDTVLTDYVKKHGTGKWNRIPTVTGLKRSGKSCRLRWMNYLSPKVKRGDFSEEEEDLVIRLHNLLGNRWSLIAGRIPGRTDNQVKNFWNTHLSKKLGVKKQKNKVCVPPKSIPIVESKDNCNSTPKGTMENSLEYNGESEKLVQASMSGDLIDFSSMHKGIMTDDFECTFSFANSVFDPCTPYFTESFQEGFFGL*
A15	SsMYB103	evm.model.Chr6.1378	22486252	22487283	3	211	8.98	23906.2	Nuclear	MEGYGHESKKRFWHAEEDAVLTDFVKKHGTGKWNRIPKVTGLKRSGKSCRLRWMNYLNPEIKRGDFSEEEEDLVIRLHNLLGNRWSLIAGRVPGRTDNQVKNFWNTYLRKKLGVKKQKSKVCAPPKSIPMVEPKSNCNSTLKGTMRNSSESNGEDEKLVQASLSGDLIDFASMHEGIMTDDFGCTFSFANSVFDLCTPYLTGSFQEGCFGL*
A4	SsMYB104	evm.model.Chr6.1392	22767109	22768936	3	474	6.85	54256.3	Nuclear	MLPSVSVTPPMDIETNLTENYASQTMHLQENYLKPSMEDQLPFGAPSSQGFLQDFHHIDNHFHVNGSSSNPIFGVQTPNFDPFDHNVTCESAPPDFEVYECKPFVSGNAHLMDNFQYVGYSMNLPRTNQLDMMVSSQSYMPFNPLETKPLNFVVPDEVSCISPPNYYKRIGLNKNIRESPSTRRTFKARKKSNIVKGQWAADEDRLLIQLVEQYGVRKWSHISQALPGRIGKQCRERWHNHLRPDIKKDIWTEEEDKILIQAHVEIGNKWAEIAKRLPGRTENSIKNHWNATKRRQYSKRKCRSKYSRGSLLQEYIKSLNLDKIPPIDYRKKSSKNVNAKTNNNGKAAAQPQCADQFCPSGHLVPKYDFNEVPDFCLDDNLFEEGCSIDSLLDDMQSAS…
A18	SsMYB105	evm.model.Chr6.1427	23332742	23334568	3	367	6	40820.7	Nuclear	MGRHSCCVKQKLRKGLWSPEEDEKLFNYITRFGVGCWSSVPKLAGLQRCGKSCRLRWINYLRPDLKRGMFSQQEEDLIISLHEVLGNRWAQIAAQLPGRTDNEIKNFWNSCLKKKLLKQGIDPTTHKPLVKEDKKITETSPMQTPLSQGPSVPLTFPSSQGSALLISDSNYYDGGLTEASREIFMSKPALDPLSSYYDFPMGVAQSGFNLPMSQYHTGLKAPDQSPFGPNSSYGFSSMSSLTNSDHGNVSVTEFSDNNSASKISSLFMNDQVKESSSNSSNMSTIYPGGGCHMSSVMENAGFSWDGDNKFDPLFQFQVNGIKSEDFKTSSWEEGQLHTHNSIDFTSFPLTSLSEDLTGGNFDVFQHI*
A33	SsMYB106	evm.model.Chr6.1555	25390019	25392284	2	269	5.33	30189.9	Nuclear	MGRQPCCDKLGVKKGPWTAEEDKKLINFILTNGQCCWRAVPKLAGLRRCGKSCRLRWTNYLRPDLKRGLLTEAEEQLVIDLHARLGNRWSKIAARLPGRTDNEIKNHWNTHIKKKLLKMGIDPVTHEPLNKQAASQDRSSSPAGHLPQPGNNLDQVKETDGVLNSEENSSSSQAENSGDDSLLLDSICSDDSLIDSLWLDETPLVEALWDTTPKVENTNNNMGLLPSWEDNCAWLLDCQDFGIHDFGFNCFNEIESNALQTIGMKEEGH*
A13	SsMYB107	evm.model.Chr6.1649	27233374	27242561	4	204	7.69	23328.1	Nuclear	MAPRNDGAAKRAMNRGAWTPEEDRKLAQCIETHGAKRWKAVAVKSGLNRCGKSCRLRWLNYLRPNIKRGNISDEEEDLILRLHKLLGNRWSLIAGRLPGRTDNEIKNYWNSHLCKKVNQKEEKPESSTTQEIIAQNQSAGYNSAVLENEVAINESGNTDVNFDVNEFFNFSSEEPNGFEWLNKYLELDHAPEASRLTYHLSQLA*
A34	SsMYB108	evm.model.Chr6.1768	29907310	29909199	3	323	7.52	36478.2	Nuclear	MVRAPCCDKANVKRGPWLPEEDAKLKSYIEEHGTGGNWIALPLKIGLKRCGKSCRLRWLNYLRPNIKHGGFSEEEDNIICSLYVKIGSRWSIIASQLPGRTDNDIKNYWNTKLKKKLLGKQRKEQQAQARRVCSLKQEIKRKTENLMLPAGVITPTPYWPEQHSLPIPVANASIQYSDLNNQTSSIKHFPNNVLTAIMNSQNSSCDISLTQDQLYPSTMNMITTDTCHTSNVFEGFGNFQGDLSEWACVNPQQIDGSMRVFYGLESMDMANGSTNTTSTESTSWGDISSLVYSPLVSDYEGHQQRMPQDVTFEESSYCVMQTQ*
A1	SsMYB109	evm.model.Chr6.1854	31798764	31800332	1	314	9.41	33926.5	Nuclear	MLHHNNSATNPSSSFPSSTTISQPLHKSMMAVTRKDMDRIKGPWSPEEDDALQKLVERHGPRNWSLISRSIPGRSGKSCRLRWCNQLSPQVEHRAFAPEEDETIIRAHARFGNKWATIARLLSGRTDNAIKNHWNSTLKRKCASVMISDDPASGGFSPRPLKRSVSAGAAVPPGSPCRSDVSESSAPGVVSPSHVFRPVPVRPTVETASSCDDGPTTSLSLSLPGVESSEVSNRAAAAAPVQVNPVAVVPVAVPVAEVGLGALNLSAEFMAVMHEMIRKEVRSYMEQQNGMCFQGMDGFRNVSVKRIGISRVDS*
A3	SsMYB110	evm.model.Chr6.2236	47821539	47823667	2	221	7.18	25438.9	Nuclear	MADSSQAAEGIANKYRPRVNYWKVAEDEKLRQLVQQHGPHDWNSIAEHLEGRTGKSCRLRWVNHLDPRLNRNPFTEEEDERLLAARELYGNKWSTIAKLFPGRTDNAVKNHWHVVMARKRREETKKRRFQELNNDSNNTSSSTNSVSHHNRAKPHEPLFGSRNEPFNDIRNHLGEETALASSMGPNRASSSSEKEQADEESNDNGDRKQVLFIDFLGVGDQ*
A3	SsMYB111	evm.model.Chr6.2237	47828743	47829982	2	159	9.36	18285.6	Nuclear	MRPAILQYAMSTEGKSCRLRWLNHLDPKVNKKPFTEEENERLLAAREVYGNKWAAIAKLFPGRTPDGVKNRWNLTMARKRREESKKRCFQDHNTASDTSFSNSLPNKGALAKTHEPFYYIRDPYCKVRASSSSEKESMDSGQKEVPFYDFLGVSGSDDQ*
A3	SsMYB112	evm.model.Chr6.2239	47860627	47862059	2	199	8.4	22740.2	Nuclear	MADSSAAGEDMANKYCPRFYHWKLAEDEKLRQLVRQHGPHNWDSIAENLEGRSGKSCRLRWLNHLDPKVNKKPFTEEENERLLAAREVYGNKWAAIAKLFPGRTPDGVKNQWNLTMAQKQREDYKKRSFRDHNTASNTSSSNSLPNKGALAKPYEPLYYMRGLYSEESASSSSEKESKDSGQKEVPFYDFLGVGGSDDQ*
A16	SsMYB113	evm.model.Chr6.2314	51313891	51316164	2	360	7.25	40031.4	Nuclear	MRNPSSSTATTKNKKSSSSSGTCNNNNNNIGSSNNNSTSTNTNTNTPCCSKVGMKRGPWTPEEDEVLANYIKKDGEGRWRTLPKRAGLLRCGKSCRLRWMNYLRPSVKRGHIAPDEEDLILRLHRLLGNRWSLIAGRIPGRTDNEIKNYWNTHLSKKLISQGIDPRTHKPLNNSPSINVPSSSKSTIPPFNKPPPMIIPNHHRHDPSIVNQGVRVHHLGQHQQPPGNNNPYGEGINNPVPAATDDVPAMGFIDNDDCNDDINNINYYSDDVFSSFLNSLINEDAFAAQQHHVHTELPIERSIPLPCDDRVDDPLITSASAPQGYDDDIGVLWESPLVSASAFSQNVNDPVTKRVRDHHDQ*
A7	SsMYB114	evm.model.Chr6.2653	61231206	61233996	2	309	7.94	34616.4	Nuclear	MKWETITLSPAPSTPNSNTSWLVEDNRSTKWTPEENKLFENALAVHDKDTPDRWHKVAEMIPGKTVGDVIRQYEELEADVSNIEAGLIPDPGYSTATSPPFTLDWVNTPGYDGFKGSGKRSSSVRPHEQERKKGVPWTEEEHKLFLLGLKKYGKGDWRNISRNFVITRTPTQVASHAQKYFIRQLSGGKDKRRASIHDITTVNLTETTTTSSSEDTNRSTSPHVLSQQQPNSTATTPTTHFQWSNQSNTGVAMTLNPANERVFMSPYGANSFGVKMQGQNLHKTALHESSYLGPQAQNMVFQMQPSSQH*
A4	SsMYB115	evm.model.Chr6.2663	61350755	61352411	3	397	8.98	45040.6	Extracellular (Secreted)	MDVTVRGGSHGGNGFQIYECEIINASNPPLAAIGIDRFLCGHFPHQQQQARNNDASVFFAEGACKWTNINQTPTMCLKDMQVFGKNAKVVGRRRKKQSSVSWIKGQWNKEEDRKLIRLVKQYGERKWAEIAERLEGRVGKQCRERWNNHLRPDIKKDSWSEEEERILVDTHSRLGNRWCQIAKLIPGRSENAIKNHWNATKRRQNSRRKNKKTKNSNGKPHSSILEDYIRSKTQISSNPTPGVITATTSSHTTLPQANAANPLNPVLSEPFADELLFMQQIFMDNQSQRSLGNVEASKLSKMSPTSCFDYCQTNVDDVGECGYVYSLQYPDSVHLNDSLLPRETHPTPLSYLPSDLYLSHLFNVAPGYGNQSLNIDFRHQGCSEGKGEMDLIEFVSS*
A33	SsMYB116	evm.model.Chr6.2908	66519307	66521857	3	327	4.9	37615	Nuclear	MGRQPCCDKVGLKKGPWTAEEDKKLIHFILTNGQCCWRAVPKLAGLLRCGKSCRLRWTNYLRPDLKRGLLSEYEEKMVIDLHAQLGNRWSKIASHLPGRTDNEIKNHWNTHIKKKLKKMGIDPVTHKPLPNATEQTQNQPNQQQLHQPVEEKQNQQALQVDFDPKVHQNKEPEKPETSLESSIINEAKEEDQIVMPPFDTMELMNGFCTDEVPIIEPDEILMPCAPSSSSTSTSYSNSTNFLEDLQLQDFEWSCNYNDNIIINNNNNEDNNNNHNSSMALWDDDYISTLNWLINEDDDSDGNQVFDASLTQFSRMVMDSESWAYGLF*
A22	SsMYB117	evm.model.Chr6.2948	67214084	67216583	3	214	9.25	24322.8	Nuclear	MRKPCCDKESINKGAWSKQEDQKLIDYIRVHGEGCWRSIPKAAGLHRCGKSCRLRWLNYLRPDIKRGIFAEDEEDLIIKLHALLGNRWSLIAGRLPGRTDNEVKNYWNSHIRRKLIKMGIDPNNHKPHQSFPRPYASAEGASTSESMNKEHQVPFFKSRGAATDRISITKSLAEETTIISSRALNLDLTIALPSPVQNSAESAKTWDMDIDLNC*
A2	SsMYB118	evm.model.Chr6.3028	68662019	68666676	2	398	5.63	43235.4	Extracellular (Secreted)	MTEEDRSAEPTVRNGVDGGEELELAGGDAEVTVVGDGSVAGRVKGPWSPEEDAVLSRLVAQFGARNWSMIARGVPGRSGKSCRLRWCNQLDPCVKRKPFTDEEDSIIVSAHAIHGNKWAAIARLLPGRTDNAIKNHWNSTLKRRCMELGRYVPAHPDMLEDGSFEKAKASSEETMSIGDINSLNPTEVRNVIMDNENNAPRKDDAKVEEHPTLHRPVARISAFSVYNPSGRPTTGSCSKMFPKQSPLIQSLEPNVGSCKLFDGIDCEPVVPLQCGHGCCARDSRESHSHGSLLGPEFVDYLESPSFSSHALISIATDLNNIAWIKSGLENYGAGVTENTANLTASQGVATASQTNFLRQDLKNGYGQFEDGPGKFLGTMQEVLSTKMARQHFAMPAEV*
A1	SsMYB119	evm.model.Chr6.3095	69931882	69932614	2	235	5.94	26620	Nuclear	MIGGDDGGDRVKGSWSPQEDATLLKLVDEHGPRNWSVISSGIPGRSGKSCRLRWCNQLSPEVQHRPFTPAEDKIIIQAHAAHGNKWATISRLLPGRTDNAIKNHWNSTLRRRRMAEQSPCLCLLGVSARQTSLLQRLKLCIEKENEEEERVASPVTTSLTLFPPGENTEEDEEEKEKEEFEVNLNNKVEGQSCFMQMMQRMIAEEVRNYVESLRHGERDSLSFGSGLDLRPMLPK*
A9	SsMYB120	evm.model.Chr6.3309	74385757	74388066	4	379	5.46	42562.6	Extracellular (Secreted)	MISVITAGVVLLFVRVTICIMSSLSHGESSGDDQSVEDSFLKKGPWTAEEDAILAAYVTNNGVGNWNVVRKHTGLARCGKSCRLRWTNHLRPDLKRGAFTTEEQRKIIELHALMGNKWARMAQELPGRTDNEIKNFWNTRLKKRKRAGLPLYPDDIKPVLNIDSPQSSLNASTQHADDSQAGTSSNVPELVFNNYKLISQKHPLYIPPISGIPENSTFEQEGSGNQIMHPPKQLHDSDKLYTSLDSNCVTPAPIDYIQFQGDSSDPPSISELPPLPSIDDTLKEDPPAEIRYYEPVSPHSNGYLESMLNPPKILEGSDHCSMQGESNLENKENSDQRYLANQHALYDFSWLENYDKDQYALKDTLFSIIHPFIHTNTNS*
A11	SsMYB121	evm.model.Chr6.455	7095314	7097874	3	324	5.51	36885	Nuclear	MDEKGTRISNALSEEEMDLRRGPWTIDEDLTLINYIATHGEGRWNTLALSAGLKRTGKSCRLRWLNYLRPDVRRGNITLEEQLLILELHSRWGNRWSKIAQYLPGRTDNEIKNYWRTRVQKHAKQLKCNVNSKQFKDTIRYLWMPRLVERIQAAAAASATKTVTTATTAITATTTVTTNNAYPYGNNLNNNFEVHNNSKMGLTPLIMNNDFVGSQSYTPENSSMAASSSDSFGTQVSTISDLADYYSVPVSSNNNTNLEDYYQPSQISYSDSITSPSGLFFQGLDFQSMDPNTSWNIQSEDSSEIFWNVENMLFLEQQLMNDNM*
A6	SsMYB122	evm.model.Chr6.51	1063040	1066690	7	306	5.28	33648.7	Nuclear	MDPISEGNTLTNNPNLASKQRLRWTNELHERFVDAVAQLDGPDRATPKGVLRVMGVQGLTIYHVKSHLQKYRLAKCLPDSSSDGTKGDKKETGDMLSNLDGSPGMQITEALKLQMEVQKRLHEQLEVQRQLQLRIEAQGKYLKNIIEEQQQFSGVLSEAPDSGVAAPVPGDMCQEPDNKTDPATPAPTSECSLLEKDSKERAPAKSVSIDESFSSHHEPLTPDSSCHVSSPIDSPKGERSTKKQRVSMEGAYSEPEMVLPHQILESSMSSYQQPNAVFLTQEQFRPSLGLSAISDKALEQDGNSSL*
A14	SsMYB123	evm.model.Chr6.602	9414099	9415727	3	325	7.54	36589.2	Nuclear	MGRSPCCSKEGLNRGAWTAHEDKILREYVKVHGEGRWRNLPKRAGLKRCGKSCRLRWLNYLRPDIKRGNISSDEEELIIRLHKLLGNRWSLIAGRLPGRTDNEIKNYWNTNLGKKVKDGHQSTSSRRLSAQLNNGNNTQNPMSQLAPMATPAPSLTPKLDSQLVRTKATKCSKVLFLNPLPRPHPSMQLPNKSKAKAKAEVEEEEEARLVDAVSNKMEPGTYDNGFLSSFPCEEKELCTDLLIDFNMGDICLSDLLNSDFTYNFSYGNVNNPELLSPCSDQPDPIFSDEVLKDWTQTNFADETNASSNLHSFSSFLESGEEKLGE*
A34	SsMYB124	evm.model.Chr6.779	12233907	12235316	3	358	6.33	40055	Nuclear	MGRAPCCDKANVKKGPWSPEEDAALKAYIEKNGTGGNWIALPQKIGLKRCGKSCRLRWLNYLRPNIKHGGFTEEEDNIICSLYISIGSRWSIIAAQLPGRTDNDIKNYWNTRLKKKLLGRRKQSNFNTKDTNGIEESSYSNALSSSALERLQLHMQLQSLQNPFSFYNNPALWPKLHPFQEKMIQSLQSLNDGSNPVMQNALPSPLVEQGQKDEFYKPQQDGAKINNPQVHLLENIPLSNSEVPFVASGSNSNPMHPSLAPRAEAVEQINNVGLQQLGALQTELDDILNNRTMGCVPQEDHGMAGFDCFREMNGSKDSLIWWSNDSDTKSASSNSWDSSTPALLTQGMFQDYEMGYSL*
A14	SsMYB125	evm.model.Chr7.1143	24970134	24972423	3	286	7.59	33143.6	Nuclear	MGRKANCANHDAVNRGPWSAEEDKILMNYVQVHGEGKWRELSKRAGLKRCGKSCRLRWLNYLKPDIKRGNISSDEEDLIIRLHKLLGNRWSLIAGRLPGRTDNEIKNYWNTYLRKKIEQKHNHNKIPGHNNNIPIKLRIESPGCSKNSLGTVLDPTKSPHPKMIKPKSMKCTKVMMPTRAVSDSVNTMNLITTSWDNQNPSASMPQDDHNHCLSGVLQDFDINDLLMSCDYEDDCRFNGYACVEIPEHIFEDETWRLDDLMGEAWYENWKIDTYFPQEQDMSFSSF*
A14	SsMYB126	evm.model.Chr7.1144	25040735	25042191	3	275	8.06	31003.8	Nuclear	MGRKGSCENPDVVNRGTWSAEEDKILMNYVQVHGEGNWRKLSKRAGLKRSGRSSRLRWLNYIKPDIKRGNISSDEEDLIIRLHNLLGNRWSLIAGRLPGRTDNEIKNYWNTHLRKKIEKHNHNKTLLLHSNKIPRKSRVESKGCTKNSLDINNTTTSPLPAQVMVPNHAANDSANTINNVIVTTCGDSHNPLASTPQDGHDNCSAGFPKQLDIRDQLIIPYEDCHCCNGCASAEILEDSGDEACWLVDSIGQAWHESWKLIDFFPPDQVANFFSL*
A6	SsMYB127	evm.model.Chr7.1254	27286233	27289278	6	310	6.31	33667.3	Extracellular (Secreted)	MFSRLIHPHEGSVGQEDMQGGSSHAHLGDPCLVLTSDPKPRLRWTADLHERFVDAVTQLGGASKATPKAIMRTMNVKGLTLYHLKSHLQKYRLGKQSGKDSDEGCKDGMSASYLQESPGTDNSSPKLPASDPNEGHEVKEALRAQMEVQSKLHLLVEAEKHLQIRQDAERRYMGMLEQACKMLADQFIGDIVINTDSQKFQGLESKTSRSSLVDQVGIFPPACTEVGGMHVSGVPPILQPQGADCSTESCLTSLESLGGLTLEGSPGGSKKRMMSLDSMVAPLIWSEASTRTQGIHLAQVYPPGITRYGM*
A12	SsMYB128	evm.model.Chr7.1317	28219170	28220660	3	266	8.54	31143.1	Nuclear	MYCEVMAGNMVWGVIEEEGWRKGPWTAEEDRLLIQYVKLHGEGRWNSVARLAGLKRNGKSCRLRWVNYLRPDLKKGQITPQEESIIQELHARWGNRWSTIARSLPGRTDNEIKNYWRTHFKKKTKNPCEAAEKAKIRSSRRQQFQQQQLQLKQMQVQQQHQQQQQQQLQFNLDMKGIINLLEENDHRVPSISQETQEMVNMYPNTSEQQGYFYSMFNVNDNVSAPESSNEEILWDGLWNLDDVLCNFNAASATSKASLHNLVAPFC*
A23	SsMYB129	evm.model.Chr7.1428	30319353	30321707	3	267	5.93	30392.3	Nuclear	MVRAPCCEKMGLKKGPWAPEEDQILTSYIEKHGHGNWRALPKQAGLLRCGKSCRLRWINYLRPGIKRGNFTTEEEETVIKLHEMLGNRWSAIAAKLSGRTDNEIKNVWHTNLKKRLLKTDHPNPKAKRLTKPKIKRSDSNSSVITQSEPANLNFIEMETTSACTTSSDFSSVTIGDSKNIKSVDIQSLETMPVIDESFWSEAATDETPTMSSQSLTISNEMPLQYPFTNCEEIFQQSHAYDSNFDDGMDFWYDIFSRTADSIELPEF*
A23	SsMYB130	evm.model.Chr7.1590	32960015	32961446	3	227	9.46	25674.5	Nuclear	MVRTPCCEKMGLKKGPWTPEEDQILISHIQRYGHGNWRALPKQAGLLRCGKSCRLRWINYLRPDIKRGKFSKEEEEIILRLHAILGNRWATIATRLPGRTDNEIKNFWHTHLKKRLERGQVHSMINTSFNPLQEAHAASSAGTLINMPQVTVDASGATASVTGKLLIANDSLLSRRNPPIVGLGFYDAVSSDISGEIIGNNSHSEIGEEMEFWYNMFMNSHHKGMKM*
A18	SsMYB131	evm.model.Chr7.1867	37251864	37253902	3	403	6.64	45380.4	Nuclear	MGRHSCCYKQKLRKGLWSPEEDEKLLNYINKHGHGCWSSVPKLAGLQRCGKSCRLRWINYLRPDLKRGAFSQQEENMIIELHAVLGNRWSQIAAQLPGRTDNEIKNLWNSCLKKKLRQRGIDPNTHKPLSEVENDKDMPPSTDKNNQKASVGSNEVSLVDQPAKPMPSERYPLEVSTSSTQELFLDRFGTTCHDNSCRPSDVVGSYFSFQQLNYGTNIGLSENPNTSLCFIPPSTSSDLHNSTITSSMLHSIFPTHVKLQSNNNPSISSDGVQNWEGSNFSNSNNTNKNNGSIQLQSSTNFLDNTWGVAESMKVNKDGQVPLQAEQEEIKWSEYLNTPFILGNTAQSQTSQSIYSEVKPETGFITDESCTSWHHSQQHPPAFQLSDIYNKDLQRFSVTF…
A11	SsMYB132	evm.model.Chr7.1934	38332301	38334074	3	290	6.83	32964.7	Nuclear	MDVKKGRSTVQTQVQVQHNENEMGLRKGPWTVDEDTVLVNYIATHGEGHWNSVARCAGLRRSGKSCRLRWLNYLRPDVRRGNITLQEQILILDLHSRWGNRWSKIAQHLPGRTDNEIKNYWRTRVIKQAKQLKCDVNSKQFRDTLRYVWMPRLLERVQPTSQALELQLDPNPSGVGAFLHQNGLHGSDSGTEWAKPNHSSCATGSYSDSSSMEFQVPSNSDHSDSSGHDVSVHRIEKGLDLWPGFNNQMLEQGSGGNGGGDTLESLWNDESMWFLQQLSDDLEIKYNSLP*
A11	SsMYB133	evm.model.Chr7.1935	38396081	38397540	3	264	5.62	30112.7	Nuclear	METISVEVMRSLSDCDSYRSEEEMVKKGPWTEEEDSVLINYVNVHGEGHWNSLARSAGLKRTGKSCRLRWLNYLRPNVRRGNITLQEQLLILDLHSRWGNRWAKIAEQLPGRTDNEIKNYWRTRVVKQAKQLKCDVNSKQFRDALRFVWMPRLMERIQASCRNGPSSSCYGLDQTTLCNTQVHSESSGANPIMFCDNSVASLYSSGVEVQPPSLSDTNTSGSYNLMGDGSSEIQAFEPCNGFGDADLWTDENIWFLQQHLADDF*
A17	SsMYB134	evm.model.Chr7.1975	39033695	39038771	3	392	5.09	43858.7	Nuclear	MGRAPCCEKVGLKKGRWTAEEDEILAKYIQANGEGSWRSLPKNAGLLRCGKSCRLRWINYLRADLKRGNISAEEENTIVKLHASFGNRWSLIASHLPGRTDNEIKNYWNSHLSRKIYCFSRVATTKTQPGAGVMSTPKVAPIPPKRKGGKTSRWAMKKNRNYTQNDTQRPKQSLTQQKSEVAVPPPPTPSIESEGFSNAVADFMVLDADVARVGEPRREELEVNRKCEKSLDGVEESTNDDILGLCQWESINEGGGALGLSDMLESCLGETSGVWNITEERESNDVVGAVGGENERRGDDTCGNKMASSESSVNGESGEWYSRSSTALGLDEPWDWESVIEFNNAESEAYKWEHQEKLLSWLWEDDDWESDSKKLGETDPLIQNDMVAWFLS*
A23	SsMYB135	evm.model.Chr7.2240	43843869	43847525	3	276	7.22	31698.6	Nuclear	MGRAPCCEKMGLKKGSWTPEEDLILINHINTHGHKNWRALPKQAGLLRCGKSCRLRWINYLRPDIKRGNFTREEEDMIVQLHEMLGNRWSTIAARLPGRTDNEIKNVWHTHLKKRLPQQDTKTHDRKQSAKQKQSSLDTQKSKQEQPPVNFPTHHVIKAESTEEKPLSFPQCLSSDMSTLTTTSDTNEHNSSAIDHHHVSMNNNVESLDDDFWSQVLSADNFNETSSFLAIGAVDRKFQFSLSPLLTQEGVQSSSVYDNVNFWYDVYMGTQELPKL*
A6	SsMYB136	evm.model.Chr7.2269	44405106	44410128	7	248	5.86	28029.5	Nuclear	MASEEYCKQNDWQEWAERLISDDDTLTSNWNDLLADNIHDLEPKVSKPFLQFPGHPSQGHQQLPASYGENCTGAALSSSSNSASAKSRMRWTPELHEAFVEAVNQLGGSERATPKGVLKLMKVEGLTIYHVKSHLQKYRTARYRPESSEGVAEKKASSIEEMSSLDLKTGIEITEALRLQMEVQKRLHEQLEIQRNLQLRIEEQGRYLQMIFEKQCKPGIETFKAPSSTIETPSGVSSNATRDFTCQK*
A34	SsMYB137	evm.model.Chr7.2442	47256786	47258745	3	322	6.01	35430.6	Nuclear	MGRAPCCDKANVKKGPWSPEEDEILKEYIEKHGTGGNWIALPQKAGLKRCGKSCRLRWLNYLRPNLKHGEFSEDEDRTICTLFASIGSRWSIIASQLPGRTDNDIKNYWNTKLKKKMMGMNPSALKKPHQVTLSSMPQNSTPSSCSSSSSPLSFKNNHNCYYQPHVPFTGSESISYSSLLGGNSSTSAYSTLQESSLGLIQNYQVNSAFMLGGETSCSSSSDGSYNNQISQVKEGELGYGGDGTFGEQIGGLSYLSSGVEDTQKLMPSNAGRVGGWTDEQSRLWGESPIDYGLEEIKQLISTSTCNNFMFDDCMTGEMVMYY*
A12	SsMYB138	evm.model.Chr7.2485	48114819	48116419	4	231	5.19	27040	Nuclear	MQGEHLRRGSWLQEEDEQLTSFVALLGERRWDSLAKLAGLRRSGKSCRLRWMNYLRPNLKHGPFSVEEEQLIVQLQQKLGNKWAKIAQKLPGRTDNEIKNYWRTHLRKRARVQQEVSGDFKDKLEIATQDFNQKSIDMVSKDYNRGNVCCQDSEWETKDSSIDTLPLSDWELRSSPFETRILDWIAELQDGYGEKEQEQDCSSTGTFNYNPQEFAEGCDSWDYSGSLWDMS*
A6	SsMYB139	evm.model.Chr7.2780	56698254	56700264	6	279	9.04	31237.3	Plasma membrane	MLKSQLNSDQCCRSREKSNKIPCGNFPGSNFLPLEQPKLFIDDVASISRSLSIPYIGNQDQAVSCGSYNLPAAQLSFSSQQEMLSPTGSMSANAGTATSNGSVVSSKTRIRWTQELHEKFVECVNRLGGAEKATPKAILRLMESDGLTIFHVKSHLQKYRIAKYMPQSTQGKSDKRTNVENVHLDVKTGLQIREALQLQLDVQRRLHEQLEIQRKLQLRIEEQGKQLKMMFDQQQKTSDSHLNTQNLDNTTNNDRPISSKDNLVSISEGSENSLLSKIS*
A6	SsMYB140	evm.model.Chr7.2781	56726326	56729002	7	284	8.89	32304.5	Extracellular (Secreted)	MYHSWQVSNGAHGSLAKVGGSEKHSFNFHQQHEQHVFDVPVSCLKFDSQKLLCQSSGDNSTPQFGSVVDSFLSSDEDTLCDTYSELPCHDVSLYKHFRCEHNRLEGDDSVPVKQVEVVCATSGNPASRVVPTRKKRIKWTKDLHEQFVAAVNSLGGPQKAMPKAVRQKMNSKSLTIFHVKSHLQKYRNTMYMQKTSKEGYEESLGRDMVTELQQKIAMQIEESRQLQLEIGRGIQEQLEVQRNLQMLVEEQKKQVNSVFGQKQTKQIGGSKSRENDGKMFLKNK*
A12	SsMYB141	evm.model.Chr7.3183	74284746	74286350	3	262	9.51	30356.2	Nuclear	MYWGKVMAGHMGRGVIQEEVWRKGPWTAEEDRLLVEYVRLHGEGRWNSVARLAGLKRNGKSCRLRWVNYLRPDLKRGQITPQEESIILELHARWGNRWSTIARSLPGRTDNEIKNYWRTHFKKKAKSASDAAEKARNRHLRKQQFHQQQQQQQLLQQQAQQQQQQLQLNFDMKGIMALLEDNSHRAPYVSQARQDMVNMQPNTTEEQGYLYSMLSGNSSASETSAEEILWDGLWNLDDFHGNFSVASAASKAGLYNLVAPFC*
A23	SsMYB142	evm.model.Chr7.3242	76239120	76242196	3	254	5.7	28929.4	Nuclear	MVRAPCCEKMGLKKGPWTPEEDQILISYIQNHGHGNWRALPKLAGLLRCGKSCRLRWINYLKPDIKRGNFSSEEEEIIIKMHELLGNRWSAIAAKLPGRTDNEIKNVWHTHLKKRLLNSDTKRVAKPKIKRSDSNSSTLTTSSACTSSGDFSSFSEGTRNMDNMIKSEDIESVETMPPIDESFWSEATVDDESSTVPSNSWTISNELVPPQHQFNSVETFQHSYGYNGSNFDDGMDFWYDLFLRSGESIELPEF*
A11	SsMYB143	evm.model.Chr7.332	5643450	5645066	5	306	6.4	35048.4	Nuclear	MSTIAKRELGSNDEESELRRGPWTLEEDSLLIHYIARHGEGRWNMLAKSAGLKRTGKSCRLRWLNYLKPDIKRGNLTPQEQLLILELHSKWGNRWSKIAQHLPGRTDNEIKNYWRTRVQKQARQLNIESGSKRFIDAVKCFWMPRLLQKMEQNNSPSSHSSMTNMMNLGNSGEASMSSISMSSSFNIPSMSSSSPPQREFMDAGNHFTTMSNPINPSPDSFQFSQLLEISEHPKSPPNMLENNVYSYPIQDNCYVNTNNYGMESLNLDPLSAMETYDFPQFDFQTAGNGWMLDSIGDTTLWNMDAM*
A21	SsMYB144	evm.model.Chr7.776	15542154	15545280	3	273	9.02	30876.9	Nuclear	MGCQPLEKAKSKHKKGLWSPEEDNKLRNYILKHGHGCWSSVPIKAGLQRNGKSCRLRWINYLRPGLKRGKFSKQEEETILTLHHMLGNKWSQISQHLPGRTDNEIKNYWHSYLKKRVAKAKEMESHNQIKYASSSSDTMDSSHSLQKLATQGPQNYNFTKEACQSSLPKLLFAEWLSLDHVRGGNPANSVDSLGLGNGFDQNSTFQEAAIHDMSEVPFGGEYHRCVTNVSAPETFNSQLKFANQMVENGFIHCIPGVDLTSNFSMSNDAMMYV*
A27	SsMYB145	evm.model.Chr7.778	15556026	15558270	3	307	7.98	34584.1	Nuclear	MGKAPCCEKHGVRRGAWTPEEDQALVDYIKEHGHGSWRTLPKHAGLLRCGKSCRLRWINYLRPGIKRGPFTKEEESTIVQLHGVLGNRWAAIASKLPGRTDNEIKNYWNTHLKKRLLRSCHSLRAKQPCIVPYRTIVKSESPLTRHMVQWESVRVEAEARLSMESSLLNSWSTSKTCPDHFLQLWHSEVGQSFRMIKGKEGVLCQSPVSQPSSSSKLESCSDVSLQVKNTGTSSCNPDLEDVNMIHEQTSSYKPKLDDDTAGSESGNYEFLDTSDSSLKHLLDMPDSDIGFLGQNDNFLNLLDGRCD*
A30	SsMYB146	evm.model.Chr8.1089	18950705	18953096	3	333	9.45	37905.2	Nuclear	MTKSSGEKNGLKKGPWTPEEDQKLIHYIQKHGHGKWRTLPKNAGLKRCGKSCRLRWANYLRPDIKRGRFSFEEEEAIIQLHSVLGNKWSTIAANLPGRTDNEIKNYWNTHIKKKLLKMGIDPVTHTPRLDVLQLASFLSSSLYNSPQFNYTALSGMGRSVINPSQVLSLLTTLLSCQSRNHDVLNHNYQQNNQLGGTPLLQNQHQCSQPMQLDSIQTFQPNQPQVSLQENHIAKSNPLNMEPQLMKTKLEHQISPIATSFSHQNTLPNLWHYNNGDHIIDPPQAQSSSAMQCFSSPKFNSIVNNLLENQILCNKRGDAEFQFKLTVIVHTLIF*
A25	SsMYB147	evm.model.Chr8.1463	28087097	28090319	3	374	4.81	42343.8	Nuclear	MGKGRAPCCDKTQVKRGPWSPAEDLKLIAFIQKYGHENWRALPKQAGLLRCGKSCRLRWINYLRPDVKRGNFTPEEEETIIRLHKALGNKWSKIASRLPGRTDNEIKNVWNTHLKKRLAAKKGSESSADESKPESSITSSSSSSSESFFSNERPNSPKTTTPSNEFNDQAENLSMTDKIEQDSEKQVSNELIGITEDPKESSVSLSSVESDIMNSSQIVSYKPEQQLASPLSYLGPYDVGSILEEVDKPNHLIEIPWESDYDFWKLLDDDSLGSLQSNEVQLGEFPTIQNNILGEESIQDAEAGKWSNDFENEFGVVGEIKESNKDHFLPKNYAVEPEMDHPQTFDFDDMTRPESELDFGYIQLWPSWPQNTSL*
A6	SsMYB148	evm.model.Chr8.1513	30279152	30281662	6	382	8.3	42287.3	Nuclear	MERMFPPKKPSTMNSHDRPMCVQGDSGLVLTTDPKPRLRWTVELHERFVDAVTQLGGPDKATPKTIMRVMGVKGLTLYHLKSHLQKFRLGKQPHKEFNDHSIKDGMRASALELQRNTASSSAMIGRNMNDNSHMVDAIRMQIEVQRRLHEQLEVQKHLQLRIEAQGKYMQSILEKAYHTLAGENMASAATNLKGAIGPHQGIPDMGVMKEFGSPLGFSSFQDLDNIYGGDQIDLQQNMEKPPLDHGFMPINESLCLGKKRSNPYSGSGKSPLIWSDDLRLQDLGGPASSCLGPQDDPFKGDQIQIAPPASLDRGTSTDIDPMSEIYDSKPVLQGEAVMGEKKFDASMKLERPSPRRAPLQAERMSPMISTGTMAQGRGSPFG*
A19	SsMYB149	evm.model.Chr8.2191	56465669	56467929	2	187	9.54	21412.3	Nuclear	MRKPDMMGKDKMNNNNNNNNIKSKLRKGLWSPEEDEKLIRYMITKGQGCWSDIARNAGLQRCGKSCRLRWINYLRPDLKRGAFSPQEEELIIHLHSILGNRWSQIAARLPGRTDNEIKNFWNSTLKKRLKINNNSTSSPNNSDSSEPRDVMGGIMPMNEHDLMTMCMDSSSSTSSSSMHHACQHGFN*
A32	SsMYB150	evm.model.Chr8.2330	59772626	59774813	3	415	6.03	45039.6	Nuclear	MGRSPCCDKVGLKKGPWTPEEDQKLLAYIEEHGHGSWRALPGKAGLQRCGKSCRLRWTNYLRPDIKRGKFSLQEEQTIIQLHALLGNRWSAIATHLPKRTDNEIKNYWNTHLKKRLTKMGIDPVTHKPKNDALLSNDGQSKTAANLSHMAQWESARLEAEARLVRESKLRSHSLQQQQLGNSATFASSSSALTSASVLNNNNKPEASAPVPVPAPGPSRSSLDVLKAWNNGGWLKSNEGNGGIASTVGVSGNLESPTSTLSFSENAQPITNGIGGENNNNNSNDTNAMPMIEFVGSSGNSSSLVKEEGEQEWKGYDSSITTFSSGLHEFTMSMEGTWASESLRTSGSHDTIVEEGFTNLLLKTNSDDLSLSSEGGGESNNGDGGGNNSDFYEDNNNYWN…
A26	SsMYB151	evm.model.Chr8.2348	60253726	60255580	3	324	6.91	35477.6	Nuclear	MGRPPCCDKGVKKGPWTPEEDIILVSYIQEHGPGNWKAVPSNTGLSRCSKSCRLRWTNYLRPGIRRGNFTDQEEKMIIHLQALLGNRWAAIAAYLPQRTDNDIKNYWNTYLKKKLNKLEAGSEGSLGHIGVSVSQPMSRGQWERRLQTDIHMAKKALSEALSPTKTPTLLTESNSNLSNDNGSVYNSTKPTQSISYASSADNIARLLKGWMKNGPKASRAASAVTQNSFNSLAGAGADTASSEGTTSWGPKGSISSVELSETIESLFGYESLDSPNSEFSQSLSPEATLFQDESKPDTTGTDMPFSLLEQWLLDDAGCQEKLSF*
A35	SsMYB152	evm.model.Chr8.2421	62198538	62200412	3	371	6.39	40790.7	Extracellular (Secreted)	MHIASPLHNSLCPSLTPLLPCLTSHISKMGRPPCCDKSNVKRGLWTPEEDAKILAYVSNHGTGNWTVVPKKAGLNRCGKSCRLRWTNYLRPDLKHDSFTPQEEELIINLHGAIGSRWSLIAKRLPGRTDNDVKNYWNTKLRKKLMKMGIDPVTHKPVSQVLSDLGSISGLPNTTNQMAFVNKDLMSNMLPTKTEPSGSNKSMVEHTHEGQVPSWEHQIPYQVINSDNVQPHVFSEAASSTSSSCSSNLTQLGSPQSYSCQTPQAQVTPPCSSFDWSEFLHSDSFMWSFNPSGLMQSEAELSNNAKSNAHDKQGGASEGSGAVACDASMEYQVNKQCEGHSSSGCSFVDSILDRDSEIRAAFPELLDASFDY*
A10	SsMYB153	evm.model.Chr8.2532	64455294	64458326	3	202	7.69	23353.2	Nuclear	MDKKPCNSSQDPEIRKGPWTMEEDLILINYIANHGEGVWNSLAKASGLKRTGKSCRLRWLNYLRPDVRRGNITPEEQLLIIELHAKWGNRWSKIAKHLPGRTDNEIKNFWRTRIQKHIKQAENLQQQGNSEINDNHQASTSTSRVSTMAQPIETYSPPSYQGILEPFPTQFPIINDQSSCCTNDNNYWSMEDIWSMQLLNGD*
A4	SsMYB154	evm.model.Chr8.2538	64591729	64594749	3	383	9.43	43656.8	Extracellular (Secreted)	MEFDPNSFQGPQQLPYLSSLFPANHCLKPQTQTTFPSQGSIIIPPSPPPILYHPNTFHHFQDHIMNVPTHNPAFVMEGPSSHITTPLYGIPTPSLGDGGAFVNVHRHHPVTLAPNHNKIMDGLHGHHKGKVIWDFSQKTMVRPCEASSSKSPLSLSNEYGLVMSEYHWDIDQRMQQLKKVKMEKDTHIANYNIIKGQWTLEEDSALVELVNQFGLKKWSQIAKLLYGRIGKQCRERWHNHLQPNIRKDSWTLEEDMILIKAHQEVGNKWSEIAKRLPGRTENTIKNHWNAAKRRRNCKRHNKNKATTYEGSLLHAYVKRVTATEEAAKVLKKSISKKNSKKVVRCSCDELALLLGYDQCSHDVFNGNNGMQVNNNAHGGNIMR*
A4	SsMYB155	evm.model.Chr8.2539	64609753	64617698	4	430	9.37	48923.6	Extracellular (Secreted)	MALVSFHTKLFCMEFDPSYFQEPHQLPYLSSTFPANPSLKPHTQTMFPSQSSILIPSSPPPKPIFYNPNNTFHHFQDHIMNVPNHNPAFAMEGPSSHITTPFYGIPTPFLGDGSSLGGGFVDVHRHHPVTLAPNNNKMVDAFHGHHKGKVMWDFSQKTMVQPWDASSSKSPSTLPLSNEYGLVMMSEYRWDTDQRMQQLKKVKVEKHTNIAIANDYIIKGQWTSEEDSALVELVEQFGLKKWSQIAKLLHGRIGKQCRERWHNHLRPNIRKDSWTLEEDMILIKAHQEVGNKWSEIAKRLPGRTENTIKNHWNTAKRRRNCKRHNKNKATTYEGSLLHAYVKRVTATEEAAKVLKKSISKKNKKVVRCGCDELALLLGYDKCSHDVFNGNSSGYAPMQV…
A20	SsMYB156	evm.model.Chr8.323	5350537	5352251	3	340	5.86	38189	Nuclear	MGHHSCCNKQKVKRGLWSPEEDEKLMNYITTYGHGCWSSVPKLAGLQRCGKSCRLRWINYLRPDLKRGSFSPQEAALIIELHSILGNRWAQIAKHLPGRTDNEVKNFWNSSIKKKLLSHDVVPSLATFSDIHGPANGSMESFFPLTDNPILNSHHHLDGQLYLPIIPPPILQGFDHHNDIKIDINDYNNANSLHFQNPMPETVPPSNNIPSLYEDTWSLGCVPIHLNANQENQIMITKSDTTPQFVVEKFINPSTWQHLVEPNVPRVCESIEDYVCNIPYSSSANSQEHEEAVACYTPGICPQDQTAAPNQVEYIDALIMSSLPSSTTSSSSVSFYQADK*
A19	SsMYB157	evm.model.Chr8.426	6816122	6818722	2	321	5.76	35768	Nuclear	MRKPEVCSTKNNNNKLRKGLWSPEEDDKLMNYMLNNGQGCWSDVARNAGLQRCGKSCRLRWINYLRPDLKRGAFSPQEEELIIHLHSLLGNRWSQIAARLPGRTDNEIKNFWNSTIKKRLKNMSSQTTTSTSPNASESSSEPSKDLNTGGFMSAQHHQRAGFVPMFSSSPSPISMQSTGFNTMIDRLPMLEHGLNMPASGGYFEGTGPCFSQSEVDNKGSYLENGVFGSVNMGVEGDMFVPPLENVSTTVNHNLSGTCKRETSSGYFDDINSILNNCNIGIAENKSGVENLFQQELATGEWDFEELMKDISSFPFVDFSIQ*
A12	SsMYB158	evm.model.Chr8.494	7694758	7696240	3	250	6.61	28412.7	Nuclear	MIQQEVRKGPWTEQEDFKLVSFVGLFGDRRWDFIAKVSGLNRTGKSCRLRWVNYLHPGLKRGKMTTQEERLVLELHSKWGNRWSRIARKLPGRTDNEIKNYWRTLMRKKAQDKKRGEAASPAPSSVHSSISSNNHAVDPHASKKAGEESFYDTGGPGMIGSTQDQGQKGEQGFSMDDIWKDIDISEGNTLQPVYDGHSEDGCNFSCPQVPSPSWEYSSEPLWVMDEESLFCPMSEPYFSCYAQGNVFFTG*
A34	SsMYB159	evm.model.Chr8.618	9996035	9997968	3	338	6.39	38089.5	Nuclear	MGRAPCCDKANVKRGPWSPEEDSKLKEYIEKHGTGGNWIALPQKAGLKRCGKSCRLRWLNYLRPNIKHGEFSDEEDRIICSLYANIGSRWSIIAAQLPGRTDNDIKNYWNTKLKRKLMGLLPASHQRIAPYQSSPQNPPSSFPSHSLPSSIYRDYSNNSHYCIPAPTVSFTCLEPISVPSSNYTNTSTSCTTTSTSLPFYQNQEPLVSVSPMQYFPITDSPMLVFGSETSCSSSDGSCSQVSLGREIKQEEMGFQNFMFGDQHMNKFMLGQGNINHDGGEEYVNQWAEKPNGCFFQTQTALDYDLEVIKQLISSNNSNNGYFSIDENKTEEKGVYYNY*
A9	SsMYB160	evm.model.Chr8.786	12732176	12734033	2	348	9.15	38516.8	Nuclear	MARTVSNNSSTNDETVDETNATRDEGEVRGRVRKGPWTPAEDAILIEYVKKHGEGSWNSVQKNSGLLRCGKSCRLRWANHLRPNLKKGAFSQEEEKIIIDLHAKLGNKWARMAAQLPGRTDNEIKNFWNTRMKRRQRAGLPLYPPEVRAEATAYHLQQNRYLEQQPHSSSSFSLLLSSCYPKKLNDPNQTHHSNATNLLQNQPDSANCYINPSQQFKFSNENSGNGNLALPLSPLSPYGSSSSTLLNHSFAPRSGSAVTDSRDYQSYGDHGFIGGSPYEPFPLVPGSTTEISSSQTPTPASSYASGVDGLMGAQAWLIIMTTMKLHHCSRKQWPVGCSSDGSSRTFSQ*
A24	SsMYB161	evm.model.Chr8.854	14288359	14291464	3	242	5.84	27750.1	Nuclear	MVRTPCCDQNGLKKGAWTPEEDRKLIAYVTKYGHWNWRLLPKFAGLARCGKSCRLRWLNYLRPDVKRGDFSHEEEETIVRLHEKLGNRWSAIAAQLSGRTDNEIKNHWHTALKKRFKQKSDTKRGTGKAKLSQSMERVTENCGDPDSSPLSPQPSCSGFSWITTDPAATTNNENSVLEHDDGLAFLDAYTEPVGANFWTEPYLIDNSYVPPECEPEYFSPMCDVELWSQNDLHLQECEGLFY*
A35	SsMYB162	evm.model.Chr9.1165	43272815	43273984	3	324	6.79	36218.9	Nuclear	MGRIPCCEKDNVKRGQWTPEEDNKLSSYIAQHGTRNWRLIPKNAGLQRCGKSCRLRWTNYLRPDLKHGQFSDSEEQTIVKLHSVFGNRWSLIAAQLPGRTDNDVKNHWNTKLKKKLSGMGIDPVTHKPFSHLMAEIATTLAPPQAAHLAEAALGCFKDEVLHLLTKKPINFQGQHSTAAPGNNFTDYINCKPEEKDATVEKIKFDLSKAIQQDPEMIPSNKPWDSTATTSSFAMPYNVFPTMPGFQFSPASFGNKGDASLWGQSVCTGSTCTAMDQQSQLHKKLEEENGDDSEATKEIRNLSNIFNSDCVVWDLPADDLINPMV*
A4	SsMYB163	evm.model.Chr9.1198	44060327	44063029	3	462	8.19	51889.2	Extracellular (Secreted)	MKGIGGGGGGAIIPIHGCENLRVTNPSMCSAGPPLTAIDRFLWGQQQSHFAQKQQPQNVANNGHANVLDGFACSGGSNYKILWPNSAQEVSFVEQLLANEEALNWTQQVHTLCLKEDVHVLGKNAKVVGRRPKKGSSVPLIKGQWTDEEDRKLLKLVKQHGVRKWSQIAEKLDGRAGKQCRERWHNHLRPDIKKDSWSEEEERILVETHAKIGNRWAEIAKRIPGRTENAIKNHWNATKRRQNSRRKNKRAGNSNGKPQPSILQDYIRSLTPTNTTTTTTPSVEPQQHLALPQLSDSVTNENSPSSTLMADSYDDEMLFMQQLFKENANVESVKHSKNNSSSTSLDCYHQTNNGGQLLTDNVTPCGFVHSNPNTNNSHNNMCLDESLFIPRKTPTPMIN…
A7	SsMYB164	evm.model.Chr9.1209	44216496	44218876	2	315	9.07	35589	Nuclear	MKWEMEILPPASPYMYNSNWLLDDNRNNIKWTPAENKLFENALAVYDKDTPDRWHKVAEMIPGKTVMDVVKQYKDLEADVCNIEAGLIPIPGYSTTSPFTLDWVNTPGYDGFKGLTPKRSSSGGRPPDQERKKGVPWTEEEHKLFLLGLKKYGKGDWRNISRNFVITRTPTQVASHAQKYFIRQLSGGKDKRRASIHDITTVNLTETTRTSPSEDSKRSTSPQPSMMLSHQQPTSSATSSGVNFQWVNQPNAGVAMALNPAHEQVFIAPYGLNSYGFKVQGQNLHRSSLHESSYLGPQTQNMVFQMQPSQHYSHA*
A33	SsMYB165	evm.model.Chr9.1475	49582399	49584911	3	322	4.83	37053.3	Nuclear	MGRQPCCDKVGLKKGPWTAEEDKKLINFILTNGQCCWRAVPKLAGLLRCGKSCRLRWTNYLRPDLKRGLLSEYEEKMVIDLHAQLGNRWSKIASHLPGRTDNEIKNHWNTHIKKKLKKMGIDPVTHKSLSNTSEQSQAQPDQQPHQPLQEQHQRQPFPVELDSKFEPENEQNKEPETSFESSTITEAREEDQIMTPLFDSMELMNEFCTDEVPIIEPNEILVPSAPSTSPTTTSSSISSYSNLSNFLEDLLLPDFEWSDNCNDNNIDNNNSSTALWDDDFIRSWNLFINDDDDGDRKQVFDAPINQYPRVIMDSESWAYGLF*
A22	SsMYB166	evm.model.Chr9.1502	50029352	50033822	3	235	9.16	26222.7	Nuclear	MRKPCCDKEGTNKGAWSKQEDQKLIDYIRAHGAGRWCSLPKAAGLHRCGKSCRLRWTNYLRPNIKRGNFAQDEEDLIIKLHALLGNRWSLIAGRLPGRTDNEVKNYWNSHIRRKLIKMGIDPNNHKVHQSFPVPQPCHVSPATSAQSSGSMDREHIVPFVTSHGSANDRASDTLSCLVEETAAVSSVSHLNLDLTIAFPSPTRALVEEKSKPTSQCTNTRNIDEDSAPTGFLLFL*
A2	SsMYB167	evm.model.Chr9.1578	51551679	51553935	3	166	9.73	18815.7	Nuclear	MTQQDRRVKGPWSPEEDAVLTRLVAHFGPRNWSMIAGGIPGRSGKSCRLRWCNQLDPSVKHKPFTVCIRIYPVPLFRTNVSSNEKCIAAEDEDRIIVAAHAVHGNKWAAIAKLLPGRTDNAIKNHWNSALKRRFMELGKYVPAHVYVAEVRSFEKTKASTEETMYS*
A6	SsMYB168	evm.model.Chr9.267	13612498	13615714	6	424	6.22	47586.6	Extracellular (Secreted)	MYYQQQQQAKNMHALRMHSPTEKHMMMQGGNGTGDSGLVLSTDAKPRLKWTPDLHERFIEAVNQLGGADKATPKTVLKLMGIPGLTLYHLKSHLQKYRISKSMHGQTNTGNNKIGFDNEFILPASTTEAAGRMSEASGIQMKHLSIGLQTNKNSEINDALQMQIEVQRRLHEQLEVQRHLQLRIEAQGKYLQAVLEKAQETLGRQNLGAEGVEAAKVQLSELASRVSSQCLDSKFSDLKELQVLWPQQAQEGQATDCSMGSFLTYSEVSQRDRETHNIGLNLRAYNGPPFSVSKECVEESIHLKPDLTLCEEVKQNMMFLSSSSDNKVVKGNFLPERPSSLLSMNVGVQEEEKFGRTTVSKEEGWKGRESTETGRVPVKVNHEKISQDYRLADFEVKLD…
A3	SsMYB169	evm.model.Chr9.404	19783953	19785967	3	299	9.4	33407.6	Extracellular (Secreted)	MSLSLKPGEEVEANSSSGTEKFRHTKLCSRGHWRPAEDAKLKEFVAQIGPQNWNSIAEHLQGRSGKSCRLRWFNQLDPRINRKAFSEEEEERLLAAHKVYGNKWAMISRLFPGRTDNAVKNHWHVIMARRQRKKSCVYRRRKPTFQTLPKDLNLTLRKNAGSESTISSIIIDESASTDTNLTPSSAKRTPMPFHNLCPVQNHQAFGALMGLSGESRTPARDVGLDKFFSAWKGSCEAVHMGRLMGVDQSHYSDSNSSEVSVSESVATNRTNLSISGETENVGDDKANMPFIDFLGVGAT*
A26	SsMYB170	evm.model.Chr9.406	20214949	20216691	3	309	6.27	35085.1	Nuclear	MVRHPCCDKVGIKKGPWTPEEDIILVSYIQEHGPGNWRSVPTKTGLSRCSKSCRLRWTNYLRPGIKRGNFTSHEEGMIIHLQAQLGNKWAAIASYLPQRTDNDIKNYWNTHLKKLKNFQAVLDPHLASDSRTATGHYASKISNDRRNLDINSNHASSSTYTSSTENISRLLEGWMRSSPTSKGTQNKEHQSNDNFENNTASVPALNMECCSYQTKDEKEGGDIMPREEFDSILFLSFENLNNAVWDKSTCDSMPEKSSEDGASEKVHAMAERNRERSENNAPPLSFLEKWLLDENVGHVEEMMALSPMF*
A33	SsMYB171	evm.model.Chr9.506	24067772	24068581	3	123	9.77	14408.8	Nuclear	MGRQPCCDKVGLKRGPWTTEEDHKLMNFILNNGIHCWRTVPKLAGLLRCGKSCRLRWINYLRPDLKRGGFTEMEEDQIIQLHSCLGNRWSKIASHFPGRTDNEIKNHWNTKIKKRLKLLSLDP*
A9	SsMYB172	evm.model.Chr9.669	29808388	29815469	4	532	5.34	58522	Nuclear	MYVVKGILRAMSNMTSGGDTRKISKGRRSSSLGEEAGDGGNMAGEGPLKKGPWTAAEDAILVEYVKKHGQGNWNAVQKYSGLARCGKSCRLRWANHLRPDLKKGAFTTEEENRILELHAKMGNKWARMAAELPGRTDNEIKNYWNTRIKRMQRAGLPIYPEELCQRILNGNQESQNVGTLTNEASPHDDLSQTDNFDIPDVELKNFKLRHGLSHGLSIFDMPECSIEQSVDSSHSYNFLFPTMHPSKRLRESEMLYNSFGSWTSNAVPLFDQYGNYTCEKISDHPRLPPPCDPIPNTSDQFHGDNPTGSHAAGNGNASSSVPISGAMKLELPSLQYPETQHGSWGTPTSPLPSLESVDTLIQSPPVEPILSDPISPQSSGLLEAVVSNSKSLKGSNNDL…
A9	SsMYB173	evm.model.Chr9.966	39272158	39274111	2	395	9.42	43531.7	Extracellular (Secreted)	MEGVTSINDAANGESGLLSMLGGNGGSGGGGSGGGGEGGGNVEEVTLKKGPWTTAEDAILIDYVTKHGEGNWNAVQRNTGLNRCGKSCRLRWANHLRPNLKKGAFSPEEEKLIVELHAQFGNKWARMAALLPGRTDNEIKNYWNTRIKRRQRQGLPLYSDDHDHHHRPTTPTPPTTPSPCLTPTGSNPNTTTNFEFFNQNHQHQNHYQYQQQQYPLSPTAPHHSPLTSPLQHRPFSPSPHTFLDPSPLPLSSSSPSPLSFTFQRPAPVLCTPLSFKRYRASHTYNHHLPDPPLNAPLPHLDGFRFPVQGFSQFFQPSLLDSDRGVSSSSSSAFAPRLELPSNQFYKRPKSPRLSLTLSSMTLVFKLAVARWGPSLRGSGTGLGPELKETRVLEFE*
A9	SsMYB174	evm.model.Chr9.968	39325729	39327520	2	132	7.81	13909.6	Nuclear	MEGVTSINDAANGESGLLAMLGGNGGSGGGGGGGGGGNVEEVTWKKGPWTTAEDAILMDYVTKHGEGNWNAVQRNTGLNRCGKSCRLRWANHLRPNLKKGAVSPEEEKLIVELHAQFGNKWARMAALVTYSL*
A26	SsMYB175	evm.model.Scaffold_264.1	66108	68494	2	141	9.79	16523	Nuclear	MRVYDAFILLFFSGLMRCSKSCRLRWTNYLRPGIKRGNFTDHEEKMIIHLQALRGNRWAAIASYLPQRTDNDIKNYWNTHLKKKLKKIQTGSDDDNDKGNSCSQIKGQWERRLQTDMHTAKQALCEALSLDKPTHISLRPN*
A28	SsMYB176	evm.model.Scaffold_428.1	13131	14398	3	309	6.76	34378.5	Nuclear	MRTPSSDDSGLKKGPWSPEEDKILVDYIQKHGHGSWRALPKLAGLNRCGKSCRLRWTNYLRPDIKRGKFSDEEEQLIINLHAVLGNKWAAIASHLPGRTDNEIKNFWNTHLKKKLLQMGLDPVTHRPRTDHLNLLSNLQQILAAAKIVSSFTNPCDINNALRLQSDATQLAKLHLLQNIFQVMGTTPSPSSNSDPLNPFGSLNSLPDGPQQPTQAGRNQHLNGGRNSSFMESQKFDEQFGSTNADPSSSNSLPNLVSASPERSPVKEAENMVNSKECSNSNPCSTTFELTWGDFMDEEATETCWKGFIE*
A11	SsMYB177	evm.model.Scaffold_802.242	4225286	4226686	3	314	5.63	35672	Nuclear	MSTLSKSIICSSEYVNELRRGPWSVEEDDLLINYIANHGEGRWNLVAIRSGLRRTGKSCRLRWLNYLKPDVKRGNLTKEEQLLIFELHSKWGNRWSKIAQQLPGRTDNEIKNYWRTRIQKQASYLKFDTDRTTGFLEFVKGLQMTRCLQKAQESSTPSTMSIQDQAIPLPLDGVSHYSSFGIGTTPTPTPQITCQGACVNEGGPNYLRQHEQNSDSEHNSGSCISSSESVNIPNMGQPLGYTTSQFQALDGCDFGICSYDGYSINNNYYMDAFNLTTTMVAEDLKLPMIDCQISETNWLNKEFACCTWSMDELW*
A3	SsMYB178	evm.model.Scaffold_802.394	7983486	7986432	3	233	7.09	27306.3	Nuclear	MCSRGHWRPAEDEKLRELVERYGPHNWNAIAEKLRGRSGKSCRLRWFNQLDPRINRSPFTEEEEERLLASHQIHGNRWAVIARHFPGRTDNAVKNHWHVMMARIRRERSKVYNTKQPLFSPNLQDDLETNFETIPSFVEKYYEKYSNPCVTHSPFQFPTKFYFQDPSSGSTVPRDKSQSVEFYDFLQVNTDSNKSEVTDNARREDEEVSQDAAGQKNKDNGVPFIDFLSTGSC*
A7	SsMYB179	evm.model.Scaffold_802.422	8760678	8764125	6	478	5.5	52581.8	Nuclear	MQDQIESTRSTIFGSASNCHSNGGKQSENVTHIPSVANSHTPKVRKPYTITKQREKWTEEEHQKFLEALKLYGRGWRQIEEHIGTKTAVQIRSHAQKFFSKVVRESEGSAESSIRPINIPPPRPKRKPLHPYPRKSVDSFKGHTIPNETEISPSSNLLVAEKDTPSPTSVLSIVGSEAFGSAFSEQINRCLSPNSCTTDIHSVSLSPIEKENDCMTSKASEEEEKGSPPSVPLSTVSNPNMCMKSDFISKDTECFIEDAATMPQTTSIKLFGRTVSMAGNQKSPNIDDENGKPITVKSDEVDDVENEKLGQSGESKQLDTQLSLGLVSGNWPITPDAEAANVTSIEPPEENLCFSECELDASSLPCWSLYQGLPAFYLRPCNQILNPMPLRPSLKVKTR…
A34	SsMYB180	evm.model.Scaffold_802.59	1001074	1002616	4	225	8.93	25062.4	Nuclear	MGRAPRCDKSNVKRGPWSPDEDATLKNYLEKHGTGGNWIALPPKAGLQRCGKSCRLRWLNYLRPHIKLGGFTEEEDKIIYTLYGTIGSRWSLIAAQLPGRTDNDVKNHWNTKLKKKFLAGNTSVATSNNGTISNTSYSDQFSTFTLQPQVEAFVLDPKQNSAAWFDSYNVLDLEQTLIPVPLLMPQELGAFNTVSSCGAPPAKEVSMLSNVACLEQQNKHTQWFG*
A21	SsMYB181	evm.model.Scaffold_802.704	16599822	16603029	3	288	6.27	32799.5	Nuclear	MEPPEKAKPKYRKGLWSPEEDNKLRNHILKHGHGCWSSVPIKAGLQRNGKSCRLRWINYLRPGLKRGVFSKHEEDTIMALHHMLGNKWSQIAQHLPGRTDNEIKNYWHSYLKKKVVKAKEMESDKQIQYASSSSDTMDNSLSPQKLATQDPSYGLLENMDKSTTHSDNFFSQNYNFSRETCQSSSLPKLLFSEWLSVDHVNGGSSVNSDDSLVLGNEFDQNSTFQEAIMHMLEENFGEEYHNTLTHSSTTEVYNSQLKSSNEVDGCDFIHCIPGTELCSNFSLTNGAM*

## Sheet: Table S3
Supplementary Table 3 Analysis and distribution of conserved motifs in R2R3-SsMYB proteins
Motif	Best matched sequences	Sites	E-value
1	NFTEEEEELIIELHALLGNRWSAIAARLPGRTDNEIKNYWNT	153	1.4e-4581
2	RCGKSCRLRWLNYLRPDJKRG	156	9.1e-2748
3	KKGPWTPEEDEKLINYIQKHG	178	2.2e-1937
4	NWRSLPKKAGL	119	1.7e-557
5	MGRAPCCDKVG	76	3.0e-452
6	LZITEALRLQMEVQRRLHEQLEVQRHLQLRIEAQGKYLQMILEKQQKTLD	19	8.1e-436
7	HJKKKLJKMGIDPVTHKPLND	37	5.8e-396
8	RVMGVKGLTJYHVKSHLQKYR	24	6e-282
9	RVQKQAKQLKCDVNSKQFRDALRYVWMPRLLERIQA	7	8.2e-98
10	KDAANLSHMAQWESARLEAEARLSRES	8	3.2e-81
11	NWSLIAEKJPG	35	2.5e-80
12	GADKATPKGVL	19	1.3e-71
13	EDEFAFWDAETDLMSGNFWLEPYILDISY	6	1.1e-56
14	AEFLDVMQEMIRKEVRSYME	8	6.7e-56
15	TNADPSPLNSLPNLVSASPEYSTVKQMENKVNPKECSBPSPTSTTFDLW	5	3.3e-50

## Sheet: Table S4
Supplementary Table 4 Segmentally and tandemly duplicated R2R3-SsMYB gene pairs
Duplicated gene1	Duplicated gene2	Ka	Ks	Ka/Ks	Selection pressure	Duplication Type
SsMYB55	SsMYB56	0.0898718	0.199526	0.450426	Purifying selection	Tandem duplication
SsMYB10	SsMYB110	0.347734	1.09822	0.316635	Purifying selection	Segmental duplication
SsMYB101	SsMYB151	0.391001	3.02572	0.129226	Purifying selection	Segmental duplication
SsMYB104	SsMYB154	0.81185	1.66902	0.486424	Purifying selection	Segmental duplication
SsMYB114	SsMYB164	0.119566	0.431712	0.276958	Purifying selection	Segmental duplication
SsMYB115	SsMYB163	0.323206	0.77543	0.416808	Purifying selection	Segmental duplication
SsMYB116	SsMYB165	0.118616	0.465649	0.254733	Purifying selection	Segmental duplication
SsMYB117	SsMYB166	0.174705	0.775528	0.225273	Purifying selection	Segmental duplication
SsMYB12	SsMYB146	0.570273	2.6724	0.213394	Purifying selection	Segmental duplication
SsMYB12	SsMYB43	0.349603	2.68673	0.130122	Purifying selection	Segmental duplication
SsMYB12	SsMYB92	0.131892	0.77173	0.170904	Purifying selection	Segmental duplication
SsMYB120	SsMYB172	0.49832	1.61996	0.307612	Purifying selection	Segmental duplication
SsMYB121	SsMYB132	0.426211	3.01497	0.141365	Purifying selection	Segmental duplication
SsMYB129	SsMYB135	0.482166	2.99273	0.161112	Purifying selection	Segmental duplication
SsMYB129	SsMYB142	0.156623	0.519547	0.301461	Purifying selection	Segmental duplication
SsMYB13	SsMYB28	0.412389	3.1619	0.130425	Purifying selection	Segmental duplication
SsMYB13	SsMYB99	0.181757	0.871676	0.208514	Purifying selection	Segmental duplication
SsMYB130	SsMYB135	0.483767	3.21082	0.150668	Purifying selection	Segmental duplication
SsMYB135	SsMYB142	0.442482	3.36306	0.131571	Purifying selection	Segmental duplication
SsMYB14	SsMYB26	0.277814	3.65714	0.0759649	Purifying selection	Segmental duplication
SsMYB14	SsMYB94	0.228235	1.1201	0.203763	Purifying selection	Segmental duplication
SsMYB143	SsMYB177	0.550538	2.56458	0.21467	Purifying selection	Segmental duplication
SsMYB15	SsMYB93	0.229422	1.02176	0.224535	Purifying selection	Segmental duplication
SsMYB16	SsMYB52	0.161988	0.69307	0.233725	Purifying selection	Segmental duplication
SsMYB19	SsMYB58	0.392171	3.13156	0.125232	Purifying selection	Segmental duplication
SsMYB19	SsMYB90	0.268906	1.41557	0.189962	Purifying selection	Segmental duplication
SsMYB21	SsMYB89	0.253277	0.759129	0.333641	Purifying selection	Segmental duplication
SsMYB23	SsMYB86	0.126293	0.395638	0.319215	Purifying selection	Segmental duplication
SsMYB26	SsMYB94	0.235643	4.04757	0.0582184	Purifying selection	Segmental duplication
SsMYB28	SsMYB99	0.491616	2.78327	0.176632	Purifying selection	Segmental duplication
SsMYB3	SsMYB82	0.390531	3.29617	0.11848	Purifying selection	Segmental duplication
SsMYB31	SsMYB95	0.099121	0.690921	0.143462	Purifying selection	Segmental duplication
SsMYB32	SsMYB53	0.151877	0.392005	0.387437	Purifying selection	Segmental duplication
SsMYB35	SsMYB51	0.382785	2.05	0.186725	Purifying selection	Segmental duplication
SsMYB39	SsMYB72	0.108249	0.482848	0.224188	Purifying selection	Segmental duplication
SsMYB4	SsMYB83	0.543988	2.68141	0.202874	Purifying selection	Segmental duplication
SsMYB43	SsMYB92	0.220143	3.42011	0.0643673	Purifying selection	Segmental duplication
SsMYB49	SsMYB84	0.416822	2.14321	0.194485	Purifying selection	Segmental duplication
SsMYB5	SsMYB58	0.598987	2.31495	0.258748	Purifying selection	Segmental duplication
SsMYB5	SsMYB90	0.706786	1.96195	0.360248	Purifying selection	Segmental duplication
SsMYB58	SsMYB90	0.408182	2.20726	0.184927	Purifying selection	Segmental duplication
SsMYB61	SsMYB77	0.144005	0.819212	0.175784	Purifying selection	Segmental duplication
SsMYB19	SsMYB5	0.744612	1.92133	0.387551	Purifying selection	Segmental duplication
SsMYB59	SsMYB6	0.321526	2.06322	0.155837	Purifying selection	Segmental duplication
SsMYB69	SsMYB7	0.738765	1.94095	0.38062	Purifying selection	Segmental duplication
SsMYB101	SsMYB6	0.248203	0.881367	0.281612	Purifying selection	Segmental duplication
SsMYB105	SsMYB8	0.108458	0.519462	0.20879	Purifying selection	Segmental duplication
SsMYB108	SsMYB13	0.42472	3.2467	0.130816	Purifying selection	Segmental duplication
SsMYB109	SsMYB14	0.278517	2.81699	0.0988703	Purifying selection	Segmental duplication
SsMYB122	SsMYB2	0.0918452	0.531312	0.172865	Purifying selection	Segmental duplication
SsMYB121	SsMYB3	0.163304	0.764066	0.21373	Purifying selection	Segmental duplication
SsMYB132	SsMYB3	0.401563	3.07507	0.130586	Purifying selection	Segmental duplication
SsMYB134	SsMYB4	0.542336	2.5516	0.212548	Purifying selection	Segmental duplication
SsMYB154	SsMYB7	0.792246	1.85506	0.427073	Purifying selection	Segmental duplication
SsMYB150	SsMYB5	0.727008	1.96853	0.369316	Purifying selection	Segmental duplication
SsMYB151	SsMYB6	0.341156	2.92316	0.116708	Purifying selection	Segmental duplication
SsMYB106	SsMYB30	0.0747558	0.478224	0.15632	Purifying selection	Segmental duplication
SsMYB109	SsMYB26	0.106275	0.887529	0.119743	Purifying selection	Segmental duplication
SsMYB108	SsMYB28	0.188427	0.721959	0.260994	Purifying selection	Segmental duplication
SsMYB107	SsMYB29	0.174927	0.432117	0.404813	Purifying selection	Segmental duplication
SsMYB150	SsMYB19	0.529367	2.59543	0.203961	Purifying selection	Segmental duplication
SsMYB148	SsMYB34	0.0922162	0.475184	0.194064	Purifying selection	Segmental duplication
SsMYB157	SsMYB35	0.399026	2.85386	0.13982	Purifying selection	Segmental duplication
SsMYB101	SsMYB59	0.430781	2.15627	0.19978	Purifying selection	Segmental duplication
SsMYB114	SsMYB38	0.276313	1.88397	0.146665	Purifying selection	Segmental duplication
SsMYB137	SsMYB49	0.411918	2.36469	0.174195	Purifying selection	Segmental duplication
SsMYB150	SsMYB58	0.276364	0.854117	0.323567	Purifying selection	Segmental duplication
SsMYB151	SsMYB59	0.16921	0.653579	0.258898	Purifying selection	Segmental duplication
SsMYB161	SsMYB44	0.483388	2.92366	0.165337	Purifying selection	Segmental duplication
SsMYB159	SsMYB49	0.171735	0.632578	0.271484	Purifying selection	Segmental duplication
SsMYB158	SsMYB50	0.194738	0.768229	0.25349	Purifying selection	Segmental duplication
SsMYB157	SsMYB51	0.120463	0.40045	0.30082	Purifying selection	Segmental duplication
SsMYB146	SsMYB43	0.549222	2.20502	0.249078	Purifying selection	Segmental duplication
SsMYB123	SsMYB78	0.491271	2.56082	0.191841	Purifying selection	Segmental duplication
SsMYB118	SsMYB75	0.356307	1.51003	0.235961	Purifying selection	Segmental duplication
SsMYB121	SsMYB82	0.406437	3.05062	0.133231	Purifying selection	Segmental duplication
SsMYB104	SsMYB69	0.72201	2.02421	0.356688	Purifying selection	Segmental duplication
SsMYB130	SsMYB68	0.170601	0.52171	0.327004	Purifying selection	Segmental duplication
SsMYB131	SsMYB81	0.147134	0.776157	0.189567	Purifying selection	Segmental duplication
SsMYB132	SsMYB82	0.406174	2.27357	0.17865	Purifying selection	Segmental duplication
SsMYB134	SsMYB83	0.275581	1.02505	0.268845	Purifying selection	Segmental duplication
SsMYB137	SsMYB84	0.1781	0.444632	0.400556	Purifying selection	Segmental duplication
SsMYB129	SsMYB63	0.945638	1.20025	0.787869	Purifying selection	Segmental duplication
SsMYB136	SsMYB62	0.0809233	0.337449	0.239809	Purifying selection	Segmental duplication
SsMYB142	SsMYB63	0.910994	1.3135	0.69356	Purifying selection	Segmental duplication
SsMYB135	SsMYB68	0.406908	3.39148	0.119979	Purifying selection	Segmental duplication
SsMYB156	SsMYB80	0.124414	0.409112	0.304109	Purifying selection	Segmental duplication
SsMYB154	SsMYB69	0.412671	1.6248	0.253982	Purifying selection	Segmental duplication
SsMYB153	SsMYB70	0.0604894	0.584223	0.103538	Purifying selection	Segmental duplication
SsMYB159	SsMYB84	0.341431	1.30653	0.261326	Purifying selection	Segmental duplication
SsMYB170	SsMYB66	0.128936	0.348266	0.370222	Purifying selection	Segmental duplication
SsMYB169	SsMYB67	0.154389	0.500963	0.308184	Purifying selection	Segmental duplication
SsMYB108	SsMYB99	0.475573	3.03955	0.156462	Purifying selection	Segmental duplication
SsMYB109	SsMYB94	0.253249	2.18718	0.115788	Purifying selection	Segmental duplication
SsMYB143	SsMYB97	0.455066	2.77689	0.163876	Purifying selection	Segmental duplication
SsMYB150	SsMYB90	0.458436	2.70317	0.169592	Purifying selection	Segmental duplication
SsMYB146	SsMYB92	0.27723	3.44093	0.0805685	Purifying selection	Segmental duplication
SsMYB180	SsMYB96	0.202021	0.495824	0.407445	Purifying selection	Segmental duplication
SsMYB177	SsMYB97	0.190548	0.496875	0.383493	Purifying selection	Segmental duplication
SsMYB178	SsMYB98	0.15442	0.608158	0.253914	Purifying selection	Segmental duplication

## Sheet: Table S5
Supplementary Table 5 One-to-one orthologous relationships between S. suberectus and A. thaliana
SsMYB Gene ID	SsMYB Gene Name	AtMYB Gene ID	AtMYB Gene Name
SsMYB21	evm.model.Chr2.1631	AtMYB105	AT1G69560
SsMYB31	evm.model.Chr2.2951	AtMYB103	AT1G63910
SsMYB21	evm.model.Chr2.1631	AtMYB117	AT1G26780
SsMYB81	evm.model.Chr4.481	AtMYB61	AT1G09540
SsMYB95	evm.model.Chr5.3142	AtMYB103	AT1G63910
SsMYB98	evm.model.Chr5.3598	AtMYB54	AT1G73410
SsMYB89	evm.model.Chr5.1343	AtMYB117	AT1G26780
SsMYB116	evm.model.Chr6.2908	AtMYB20	AT1G66230
SsMYB131	evm.model.Chr7.1867	AtMYB61	AT1G09540
SsMYB143	evm.model.Chr7.332	AtMYB62	AT1G68320
SsMYB147	evm.model.Chr8.1463	AtMYB72	AT1G56160
SsMYB147	evm.model.Chr8.1463	AtMYB58	AT1G16490
SsMYB178	evm.model.Scaffold_802.394	AtMYB54	AT1G73410
SsMYB16	evm.model.Chr1.4261	AtMYB7	AT2G16720
SsMYB26	evm.model.Chr2.2591	AtMYB70	AT2G23290
SsMYB39	evm.model.Chr3.1320	AtMYB91	AT2G37630
SsMYB82	evm.model.Chr4.554	AtMYB2	AT2G47190
SsMYB73	evm.model.Chr4.2174	AtMYB91	AT2G37630
SsMYB63	evm.model.Chr4.1237	AtMYB14	AT2G31180
SsMYB118	evm.model.Chr6.3028	AtMYB25	AT2G39880
SsMYB120	evm.model.Chr6.3309	AtMYB81	AT2G26960
SsMYB133	evm.model.Chr7.1935	AtMYB2	AT2G47190
SsMYB134	evm.model.Chr7.1975	AtMYB12	AT2G47460
SsMYB160	evm.model.Chr8.786	AtMYB101	AT2G32460
SsMYB28	evm.model.Chr2.2663	AtMYB84	AT3G49690
SsMYB26	evm.model.Chr2.2591	AtMYB77	AT3G50060
SsMYB32	evm.model.Chr2.3104	AtMYB107	AT3G02940
SsMYB53	evm.model.Chr3.3198	AtMYB107	AT3G02940
SsMYB50	evm.model.Chr3.2641	AtMYB48	AT3G46130
SsMYB69	evm.model.Chr4.2120	AtMYB118	AT3G27785
SsMYB71	evm.model.Chr4.2124	AtMYB21	AT3G27810
SsMYB71	evm.model.Chr4.2124	AtMYB57	AT3G01530
SsMYB75	evm.model.Chr4.2279	AtMYB1	AT3G09230
SsMYB80	evm.model.Chr4.3266	AtMYB26	AT3G13890
SsMYB118	evm.model.Chr6.3028	AtMYB109	AT3G55730
SsMYB101	evm.model.Chr6.1272	AtMYB94	AT3G47600
SsMYB121	evm.model.Chr6.455	AtMYB108	AT3G06490
SsMYB134	evm.model.Chr7.1975	AtMYB11	AT3G62610
SsMYB138	evm.model.Chr7.2485	AtMYB27	AT3G53200
SsMYB129	evm.model.Chr7.1428	AtMYB15	AT3G23250
SsMYB153	evm.model.Chr8.2532	AtMYB57	AT3G01530
SsMYB152	evm.model.Chr8.2421	AtMYB35	AT3G28470
SsMYB150	evm.model.Chr8.2330	AtMYB106	AT3G01140
SsMYB147	evm.model.Chr8.1463	AtMYB10	AT3G12820
SsMYB151	evm.model.Chr8.2348	AtMYB30	AT3G28910
SsMYB16	evm.model.Chr1.4261	AtMYB32	AT4G34990
SsMYB12	evm.model.Chr1.347	AtMYB102	AT4G21440
SsMYB16	evm.model.Chr1.4261	AtMYB4	AT4G38620
SsMYB26	evm.model.Chr2.2591	AtMYB73	AT4G37260
SsMYB28	evm.model.Chr2.2663	AtMYB87	AT4G37780
SsMYB30	evm.model.Chr2.2838	AtMYB85	AT4G22680
SsMYB30	evm.model.Chr2.2838	AtMYB42	AT4G12350
SsMYB24	evm.model.Chr2.2005	AtMYB39	AT4G17785
SsMYB106	evm.model.Chr6.1555	AtMYB85	AT4G22680
SsMYB106	evm.model.Chr6.1555	AtMYB42	AT4G12350
SsMYB141	evm.model.Chr7.3183	AtMYB79	AT4G13480
SsMYB4	evm.model.Chr1.1275	AtMYB111	AT5G49330
SsMYB3	evm.model.Chr1.1197	AtMYB78	AT5G49620
SsMYB26	evm.model.Chr2.2591	AtMYB44	AT5G67300
SsMYB32	evm.model.Chr2.3104	AtMYB9	AT5G16770
SsMYB28	evm.model.Chr2.2663	AtMYB68	AT5G65790
SsMYB50	evm.model.Chr3.2641	AtMYB59	AT5G59780
SsMYB53	evm.model.Chr3.3198	AtMYB9	AT5G16770
SsMYB67	evm.model.Chr4.1714	AtMYB56	AT5G17800
SsMYB71	evm.model.Chr4.2124	AtMYB24	AT5G40350
SsMYB69	evm.model.Chr4.2120	AtMYB115	AT5G40360
SsMYB81	evm.model.Chr4.481	AtMYB86	AT5G26660
SsMYB124	evm.model.Chr6.779	AtMYB36	AT5G57620
SsMYB150	evm.model.Chr8.2330	AtMYB16	AT5G15310
SsMYB158	evm.model.Chr8.494	AtMYB59	AT5G59780
SsMYB162	evm.model.Chr9.1165	AtMYB80	AT5G56110
SsMYB163	evm.model.Chr9.1198	AtMYB119	AT5G58850
SsMYB181	evm.model.Scaffold_802.704	AtMYB19	AT5G52260
Note: NaN indicate Not a Number

## Sheet: Table S6
Supplementary Table 6 One-to-one orthologous relationships between S. suberectus and G. max
SsMYB Gene ID	SsMYB Gene Name	GmMYB Gene ID	GmMYB Gene Name
SsMYB13	evm.model.Chr1.3706	GmMYB139	Glyma01g40410
SsMYB5	evm.model.Chr1.2117	GmMYB171	Glyma04g33210
SsMYB6	evm.model.Chr1.2135	GmMYB172	Glyma04g33720
SsMYB8	evm.model.Chr1.2295	GmMYB186	Glyma04g36110
SsMYB9	evm.model.Chr1.2509	GmMYB141	Glyma04g38240
SsMYB10	evm.model.Chr1.2938	GmMYB056	Glyma04g42110
SsMYB11	evm.model.Chr1.3132	GmMYB054	Glyma04g11040
SsMYB13	evm.model.Chr1.3706	GmMYB161	Glyma04g05170
SsMYB14	evm.model.Chr1.3788	GmMYB011	Glyma04g04490
SsMYB15	evm.model.Chr1.3866	GmMYB231	Glyma04g03910
SsMYB16	evm.model.Chr1.4261	GmMYB140	Glyma04g00550
SsMYB6	evm.model.Chr1.2135	GmMYB207	Glyma05g01080
SsMYB8	evm.model.Chr1.2295	GmMYB057	Glyma05g02550
SsMYB5	evm.model.Chr1.2117	GmMYB157	Glyma06g21040
SsMYB6	evm.model.Chr1.2135	GmMYB173	Glyma06g20800
SsMYB7	evm.model.Chr1.2260	GmMYB234	Glyma06g19280
SsMYB8	evm.model.Chr1.2295	GmMYB162	Glyma06g18830
SsMYB9	evm.model.Chr1.2509	GmMYB006	Glyma06g16820
SsMYB10	evm.model.Chr1.2938	GmMYB060	Glyma06g12690
SsMYB11	evm.model.Chr1.3132	GmMYB059	Glyma06g10840
SsMYB13	evm.model.Chr1.3706	GmMYB040	Glyma06g05260
SsMYB15	evm.model.Chr1.3866	GmMYB036	Glyma06g04010
SsMYB16	evm.model.Chr1.4261	GmMYB002	Glyma06g00630
SsMYB12	evm.model.Chr1.347	GmMYB210	Glyma07g30860
SsMYB3	evm.model.Chr1.1197	GmMYB105	Glyma07g36430
SsMYB4	evm.model.Chr1.1275	GmMYB174	Glyma07g37140
SsMYB12	evm.model.Chr1.347	GmMYB064	Glyma08g06440
SsMYB9	evm.model.Chr1.2509	GmMYB106	Glyma08g00810
SsMYB3	evm.model.Chr1.1197	GmMYB110	Glyma09g03690
SsMYB4	evm.model.Chr1.1275	GmMYB197	Glyma09g04370
SsMYB16	evm.model.Chr1.4261	GmMYB042	Glyma11g11450
SsMYB16	evm.model.Chr1.4261	GmMYB005	Glyma12g03600
SsMYB12	evm.model.Chr1.347	GmMYB017	Glyma13g32090
SsMYB13	evm.model.Chr1.3706	GmMYB219	Glyma14g10340
SsMYB14	evm.model.Chr1.3788	GmMYB019	Glyma14g09540
SsMYB12	evm.model.Chr1.347	GmMYB083	Glyma15g07230
SsMYB3	evm.model.Chr1.1197	GmMYB028	Glyma15g14620
SsMYB4	evm.model.Chr1.1275	GmMYB198	Glyma15g15400
SsMYB13	evm.model.Chr1.3706	GmMYB221	Glyma17g35020
SsMYB14	evm.model.Chr1.3788	GmMYB012	Glyma17g35620
SsMYB8	evm.model.Chr1.2295	GmMYB189	Glyma17g09310
SsMYB3	evm.model.Chr1.1197	GmMYB014	Glyma17g04170
SsMYB4	evm.model.Chr1.1275	GmMYB204	Glyma17g03480
SsMYB26	evm.model.Chr2.2591	GmMYB032	Glyma01g39740
SsMYB28	evm.model.Chr2.2663	GmMYB139	Glyma01g40410
SsMYB29	evm.model.Chr2.2788	GmMYB047	Glyma01g41610
SsMYB30	evm.model.Chr2.2838	GmMYB097	Glyma01g42050
SsMYB31	evm.model.Chr2.2951	GmMYB232	Glyma01g43120
SsMYB32	evm.model.Chr2.3104	GmMYB050	Glyma01g44370
SsMYB23	evm.model.Chr2.1675	GmMYB138	Glyma01g05190
SsMYB24	evm.model.Chr2.2005	GmMYB010	Glyma01g02070
SsMYB23	evm.model.Chr2.1675	GmMYB051	Glyma02g02310
SsMYB19	evm.model.Chr2.1610	GmMYB052	Glyma02g12260
SsMYB21	evm.model.Chr2.1631	GmMYB228	Glyma02g12100
SsMYB26	evm.model.Chr2.2591	GmMYB041	Glyma05g21220
SsMYB28	evm.model.Chr2.2663	GmMYB208	Glyma05g23080
SsMYB30	evm.model.Chr2.2838	GmMYB101	Glyma05g03780
SsMYB29	evm.model.Chr2.2788	GmMYB058	Glyma05g04900
SsMYB31	evm.model.Chr2.2951	GmMYB209	Glyma05g37460
SsMYB36	evm.model.Chr2.902	GmMYB143	Glyma07g14480
SsMYB19	evm.model.Chr2.1610	GmMYB063	Glyma07g35560
SsMYB31	evm.model.Chr2.2951	GmMYB163	Glyma08g02080
SsMYB23	evm.model.Chr2.1675	GmMYB067	Glyma08g40950
SsMYB24	evm.model.Chr2.2005	GmMYB069	Glyma09g33870
SsMYB26	evm.model.Chr2.2591	GmMYB003	Glyma11g05550
SsMYB29	evm.model.Chr2.2788	GmMYB115	Glyma11g03770
SsMYB30	evm.model.Chr2.2838	GmMYB114	Glyma11g03300
SsMYB31	evm.model.Chr2.2951	GmMYB165	Glyma11g02400
SsMYB32	evm.model.Chr2.3104	GmMYB072	Glyma11g01150
SsMYB35	evm.model.Chr2.62	GmMYB118	Glyma12g36630
SsMYB32	evm.model.Chr2.3104	GmMYB029	Glyma12g01960
SsMYB35	evm.model.Chr2.62	GmMYB180	Glyma13g27310
SsMYB33	evm.model.Chr2.349	GmMYB084	Glyma15g35860
SsMYB30	evm.model.Chr2.2838	GmMYB126	Glyma17g14290
SsMYB28	evm.model.Chr2.2663	GmMYB168	Glyma17g16980
SsMYB29	evm.model.Chr2.2788	GmMYB127	Glyma17g15270
SsMYB53	evm.model.Chr3.3198	GmMYB050	Glyma01g44370
SsMYB52	evm.model.Chr3.2990	GmMYB140	Glyma04g00550
SsMYB52	evm.model.Chr3.2990	GmMYB140	Glyma04g00550
SsMYB43	evm.model.Chr3.2228	GmMYB061	Glyma06g45460
SsMYB44	evm.model.Chr3.2235	GmMYB142	Glyma06g45520
SsMYB46	evm.model.Chr3.2237	GmMYB034	Glyma06g45540
SsMYB52	evm.model.Chr3.2990	GmMYB002	Glyma06g00630
SsMYB52	evm.model.Chr3.2990	GmMYB002	Glyma06g00630
SsMYB60	evm.model.Chr3.768	GmMYB196	Glyma07g07960
SsMYB39	evm.model.Chr3.1320	GmMYB240	Glyma07g15850
SsMYB55	evm.model.Chr3.325	GmMYB108	Glyma08g27660
SsMYB58	evm.model.Chr3.448	GmMYB070	Glyma09g37040
SsMYB60	evm.model.Chr3.768	GmMYB212	Glyma09g39720
SsMYB49	evm.model.Chr3.2496	GmMYB166	Glyma11g19980
SsMYB53	evm.model.Chr3.3198	GmMYB073	Glyma11g11570
SsMYB50	evm.model.Chr3.2641	GmMYB074	Glyma11g15180
SsMYB51	evm.model.Chr3.2728	GmMYB202	Glyma11g14200
SsMYB52	evm.model.Chr3.2990	GmMYB042	Glyma11g11450
SsMYB53	evm.model.Chr3.3198	GmMYB072	Glyma11g01150
SsMYB51	evm.model.Chr3.2728	GmMYB179	Glyma12g06180
SsMYB52	evm.model.Chr3.2990	GmMYB005	Glyma12g03600
SsMYB53	evm.model.Chr3.3198	GmMYB029	Glyma12g01960
SsMYB44	evm.model.Chr3.2235	GmMYB149	Glyma12g11490
SsMYB49	evm.model.Chr3.2496	GmMYB216	Glyma12g08480
SsMYB43	evm.model.Chr3.2228	GmMYB076	Glyma12g32610
SsMYB47	evm.model.Chr3.2238	GmMYB150	Glyma12g32530
SsMYB43	evm.model.Chr3.2228	GmMYB242	Glyma13g37820
SsMYB49	evm.model.Chr3.2496	GmMYB167	Glyma13g39760
SsMYB51	evm.model.Chr3.2728	GmMYB188	Glyma13g41470
SsMYB58	evm.model.Chr3.448	GmMYB077	Glyma13g05550
SsMYB59	evm.model.Chr3.477	GmMYB004	Glyma13g05370
SsMYB50	evm.model.Chr3.2641	GmMYB082	Glyma15g04620
SsMYB51	evm.model.Chr3.2728	GmMYB020	Glyma15g03920
SsMYB58	evm.model.Chr3.448	GmMYB092	Glyma18g49630
SsMYB59	evm.model.Chr3.477	GmMYB007	Glyma18g49360
SsMYB39	evm.model.Chr3.1320	GmMYB151	Glyma18g39760
SsMYB57	evm.model.Chr3.442	GmMYB096	Glyma19g02980
SsMYB82	evm.model.Chr4.554	GmMYB016	Glyma02g01300
SsMYB83	evm.model.Chr4.604	GmMYB200	Glyma02g01740
SsMYB66	evm.model.Chr4.1704	GmMYB160	Glyma03g00890
SsMYB67	evm.model.Chr4.1714	GmMYB230	Glyma03g00980
SsMYB68	evm.model.Chr4.212	GmMYB022	Glyma03g41100
SsMYB81	evm.model.Chr4.481	GmMYB039	Glyma03g38660
SsMYB82	evm.model.Chr4.554	GmMYB099	Glyma03g38040
SsMYB83	evm.model.Chr4.604	GmMYB190	Glyma03g37640
SsMYB84	evm.model.Chr4.999	GmMYB038	Glyma03g34110
SsMYB76	evm.model.Chr4.2795	GmMYB206	Glyma03g01540
SsMYB70	evm.model.Chr4.2123	GmMYB027	Glyma05g08690
SsMYB80	evm.model.Chr4.3266	GmMYB102	Glyma07g01050
SsMYB61	evm.model.Chr4.110	GmMYB103	Glyma07g05960
SsMYB72	evm.model.Chr4.2173	GmMYB240	Glyma07g15850
SsMYB76	evm.model.Chr4.2795	GmMYB196	Glyma07g07960
SsMYB77	evm.model.Chr4.3015	GmMYB103	Glyma07g05960
SsMYB78	evm.model.Chr4.3190	GmMYB033	Glyma07g04210
SsMYB80	evm.model.Chr4.3266	GmMYB107	Glyma08g20440
SsMYB76	evm.model.Chr4.2795	GmMYB212	Glyma09g39720
SsMYB82	evm.model.Chr4.554	GmMYB031	Glyma10g01330
SsMYB84	evm.model.Chr4.999	GmMYB164	Glyma10g06190
SsMYB68	evm.model.Chr4.212	GmMYB199	Glyma10g30860
SsMYB81	evm.model.Chr4.481	GmMYB214	Glyma10g28250
SsMYB84	evm.model.Chr4.999	GmMYB218	Glyma13g20510
SsMYB78	evm.model.Chr4.3190	GmMYB193	Glyma13g16890
SsMYB61	evm.model.Chr4.110	GmMYB024	Glyma16g02570
SsMYB77	evm.model.Chr4.3015	GmMYB024	Glyma16g02570
SsMYB78	evm.model.Chr4.3190	GmMYB195	Glyma16g00920
SsMYB78	evm.model.Chr4.3190	GmMYB205	Glyma17g05830
SsMYB76	evm.model.Chr4.2795	GmMYB169	Glyma18g46480
SsMYB73	evm.model.Chr4.2174	GmMYB151	Glyma18g39760
SsMYB77	evm.model.Chr4.3015	GmMYB045	Glyma19g44660
SsMYB70	evm.model.Chr4.2123	GmMYB026	Glyma19g14230
SsMYB70	evm.model.Chr4.2123	GmMYB130	Glyma19g00930
SsMYB61	evm.model.Chr4.110	GmMYB045	Glyma19g44660
SsMYB68	evm.model.Chr4.212	GmMYB134	Glyma19g43740
SsMYB81	evm.model.Chr4.481	GmMYB094	Glyma19g41250
SsMYB82	evm.model.Chr4.554	GmMYB001	Glyma19g40650
SsMYB83	evm.model.Chr4.604	GmMYB176	Glyma19g40250
SsMYB84	evm.model.Chr4.999	GmMYB018	Glyma19g36830
SsMYB66	evm.model.Chr4.1704	GmMYB222	Glyma19g29750
SsMYB67	evm.model.Chr4.1714	GmMYB236	Glyma19g29670
SsMYB81	evm.model.Chr4.481	GmMYB023	Glyma20g22230
SsMYB86	evm.model.Chr5.1267	GmMYB138	Glyma01g05190
SsMYB95	evm.model.Chr5.3142	GmMYB232	Glyma01g43120
SsMYB89	evm.model.Chr5.1343	GmMYB228	Glyma02g12100
SsMYB90	evm.model.Chr5.1349	GmMYB052	Glyma02g12260
SsMYB86	evm.model.Chr5.1267	GmMYB051	Glyma02g02310
SsMYB93	evm.model.Chr5.209	GmMYB231	Glyma04g03910
SsMYB94	evm.model.Chr5.296	GmMYB011	Glyma04g04490
SsMYB99	evm.model.Chr5.372	GmMYB161	Glyma04g05170
SsMYB95	evm.model.Chr5.3142	GmMYB209	Glyma05g37460
SsMYB96	evm.model.Chr5.3287	GmMYB225	Glyma05g36120
SsMYB97	evm.model.Chr5.3420	GmMYB021	Glyma05g35050
SsMYB93	evm.model.Chr5.209	GmMYB036	Glyma06g04010
SsMYB99	evm.model.Chr5.372	GmMYB040	Glyma06g05260
SsMYB97	evm.model.Chr5.3420	GmMYB104	Glyma07g10320
SsMYB90	evm.model.Chr5.1349	GmMYB063	Glyma07g35560
SsMYB91	evm.model.Chr5.1506	GmMYB211	Glyma07g33960
SsMYB92	evm.model.Chr5.1820	GmMYB210	Glyma07g30860
SsMYB96	evm.model.Chr5.3287	GmMYB224	Glyma07g15250
SsMYB95	evm.model.Chr5.3142	GmMYB163	Glyma08g02080
SsMYB97	evm.model.Chr5.3420	GmMYB044	Glyma08g04670
SsMYB92	evm.model.Chr5.1820	GmMYB064	Glyma08g06440
SsMYB86	evm.model.Chr5.1267	GmMYB067	Glyma08g40950
SsMYB97	evm.model.Chr5.3420	GmMYB111	Glyma09g31570
SsMYB98	evm.model.Chr5.3598	GmMYB068	Glyma09g29940
SsMYB95	evm.model.Chr5.3142	GmMYB165	Glyma11g02400
SsMYB92	evm.model.Chr5.1820	GmMYB017	Glyma13g32090
SsMYB94	evm.model.Chr5.296	GmMYB019	Glyma14g09540
SsMYB99	evm.model.Chr5.372	GmMYB219	Glyma14g10340
SsMYB92	evm.model.Chr5.1820	GmMYB083	Glyma15g07230
SsMYB87	evm.model.Chr5.1326	GmMYB124	Glyma16g06900
SsMYB94	evm.model.Chr5.296	GmMYB012	Glyma17g35620
SsMYB86	evm.model.Chr5.1267	GmMYB091	Glyma18g16040
SsMYB91	evm.model.Chr5.1506	GmMYB177	Glyma20g01610
SsMYB106	evm.model.Chr6.1555	GmMYB097	Glyma01g42050
SsMYB107	evm.model.Chr6.1649	GmMYB047	Glyma01g41610
SsMYB108	evm.model.Chr6.1768	GmMYB139	Glyma01g40410
SsMYB109	evm.model.Chr6.1854	GmMYB032	Glyma01g39740
SsMYB115	evm.model.Chr6.2663	GmMYB229	Glyma02g39070
SsMYB116	evm.model.Chr6.2908	GmMYB098	Glyma02g41180
SsMYB117	evm.model.Chr6.2948	GmMYB170	Glyma02g41440
SsMYB101	evm.model.Chr6.1272	GmMYB172	Glyma04g33720
SsMYB105	evm.model.Chr6.1427	GmMYB186	Glyma04g36110
SsMYB101	evm.model.Chr6.1272	GmMYB207	Glyma05g01080
SsMYB105	evm.model.Chr6.1427	GmMYB057	Glyma05g02550
SsMYB106	evm.model.Chr6.1555	GmMYB101	Glyma05g03780
SsMYB107	evm.model.Chr6.1649	GmMYB058	Glyma05g04900
SsMYB108	evm.model.Chr6.1768	GmMYB208	Glyma05g23080
SsMYB109	evm.model.Chr6.1854	GmMYB041	Glyma05g21220
SsMYB101	evm.model.Chr6.1272	GmMYB173	Glyma06g20800
SsMYB104	evm.model.Chr6.1392	GmMYB234	Glyma06g19280
SsMYB105	evm.model.Chr6.1427	GmMYB162	Glyma06g18830
SsMYB110	evm.model.Chr6.2236	GmMYB060	Glyma06g12690
SsMYB121	evm.model.Chr6.455	GmMYB105	Glyma07g36430
SsMYB123	evm.model.Chr6.602	GmMYB191	Glyma07g04240
SsMYB121	evm.model.Chr6.455	GmMYB110	Glyma09g03690
SsMYB107	evm.model.Chr6.1649	GmMYB115	Glyma11g03770
SsMYB109	evm.model.Chr6.1854	GmMYB003	Glyma11g05550
SsMYB116	evm.model.Chr6.2908	GmMYB116	Glyma11g33620
SsMYB106	evm.model.Chr6.1555	GmMYB114	Glyma11g03300
SsMYB124	evm.model.Chr6.779	GmMYB013	Glyma13g01200
SsMYB123	evm.model.Chr6.602	GmMYB193	Glyma13g16890
SsMYB115	evm.model.Chr6.2663	GmMYB235	Glyma14g37140
SsMYB117	evm.model.Chr6.2948	GmMYB203	Glyma14g07510
SsMYB118	evm.model.Chr6.3028	GmMYB081	Glyma14g06870
SsMYB116	evm.model.Chr6.2908	GmMYB122	Glyma14g39530
SsMYB121	evm.model.Chr6.455	GmMYB028	Glyma15g14620
SsMYB121	evm.model.Chr6.455	GmMYB014	Glyma17g04170
SsMYB123	evm.model.Chr6.602	GmMYB205	Glyma17g05830
SsMYB124	evm.model.Chr6.779	GmMYB220	Glyma17g07330
SsMYB106	evm.model.Chr6.1555	GmMYB126	Glyma17g14290
SsMYB107	evm.model.Chr6.1649	GmMYB127	Glyma17g15270
SsMYB108	evm.model.Chr6.1768	GmMYB168	Glyma17g16980
SsMYB101	evm.model.Chr6.1272	GmMYB153	Glyma17g10820
SsMYB105	evm.model.Chr6.1427	GmMYB189	Glyma17g09310
SsMYB115	evm.model.Chr6.2663	GmMYB088	Glyma18g07360
SsMYB133	evm.model.Chr7.1935	GmMYB016	Glyma02g01300
SsMYB134	evm.model.Chr7.1975	GmMYB200	Glyma02g01740
SsMYB129	evm.model.Chr7.1428	GmMYB158	Glyma02g00820
SsMYB142	evm.model.Chr7.3242	GmMYB158	Glyma02g00820
SsMYB135	evm.model.Chr7.2240	GmMYB201	Glyma03g31980
SsMYB130	evm.model.Chr7.1590	GmMYB022	Glyma03g41100
SsMYB131	evm.model.Chr7.1867	GmMYB039	Glyma03g38660
SsMYB132	evm.model.Chr7.1934	GmMYB226	Glyma03g38070
SsMYB133	evm.model.Chr7.1935	GmMYB099	Glyma03g38040
SsMYB134	evm.model.Chr7.1975	GmMYB190	Glyma03g37640
SsMYB137	evm.model.Chr7.2442	GmMYB038	Glyma03g34110
SsMYB132	evm.model.Chr7.1934	GmMYB031	Glyma10g01330
SsMYB133	evm.model.Chr7.1935	GmMYB112	Glyma10g01340
SsMYB137	evm.model.Chr7.2442	GmMYB164	Glyma10g06190
SsMYB138	evm.model.Chr7.2485	GmMYB146	Glyma10g06680
SsMYB144	evm.model.Chr7.776	GmMYB148	Glyma10g38110
SsMYB145	evm.model.Chr7.778	GmMYB071	Glyma10g38090
SsMYB125	evm.model.Chr7.1143	GmMYB175	Glyma10g35050
SsMYB128	evm.model.Chr7.1317	GmMYB113	Glyma10g33450
SsMYB129	evm.model.Chr7.1428	GmMYB215	Glyma10g32410
SsMYB130	evm.model.Chr7.1590	GmMYB199	Glyma10g30860
SsMYB131	evm.model.Chr7.1867	GmMYB214	Glyma10g28250
SsMYB142	evm.model.Chr7.3242	GmMYB159	Glyma10g00930
SsMYB141	evm.model.Chr7.3183	GmMYB113	Glyma10g33450
SsMYB137	evm.model.Chr7.2442	GmMYB218	Glyma13g20510
SsMYB138	evm.model.Chr7.2485	GmMYB120	Glyma13g20880
SsMYB135	evm.model.Chr7.2240	GmMYB132	Glyma19g34740
SsMYB130	evm.model.Chr7.1590	GmMYB134	Glyma19g43740
SsMYB131	evm.model.Chr7.1867	GmMYB094	Glyma19g41250
SsMYB132	evm.model.Chr7.1934	GmMYB133	Glyma19g40670
SsMYB133	evm.model.Chr7.1935	GmMYB001	Glyma19g40650
SsMYB134	evm.model.Chr7.1975	GmMYB176	Glyma19g40250
SsMYB137	evm.model.Chr7.2442	GmMYB018	Glyma19g36830
SsMYB144	evm.model.Chr7.776	GmMYB025	Glyma20g29710
SsMYB145	evm.model.Chr7.778	GmMYB095	Glyma20g29730
SsMYB125	evm.model.Chr7.1143	GmMYB178	Glyma20g32500
SsMYB128	evm.model.Chr7.1317	GmMYB183	Glyma20g34140
SsMYB129	evm.model.Chr7.1428	GmMYB223	Glyma20g35180
SsMYB141	evm.model.Chr7.3183	GmMYB135	Glyma20g20980
SsMYB141	evm.model.Chr7.3183	GmMYB183	Glyma20g34140
SsMYB128	evm.model.Chr7.1317	GmMYB135	Glyma20g20980
SsMYB131	evm.model.Chr7.1867	GmMYB023	Glyma20g22230
SsMYB142	evm.model.Chr7.3242	GmMYB223	Glyma20g35180
SsMYB153	evm.model.Chr8.2532	GmMYB027	Glyma05g08690
SsMYB161	evm.model.Chr8.854	GmMYB062	Glyma06g45550
SsMYB156	evm.model.Chr8.323	GmMYB102	Glyma07g01050
SsMYB156	evm.model.Chr8.323	GmMYB107	Glyma08g20440
SsMYB147	evm.model.Chr8.1463	GmMYB066	Glyma08g17860
SsMYB150	evm.model.Chr8.2330	GmMYB070	Glyma09g37040
SsMYB157	evm.model.Chr8.426	GmMYB202	Glyma11g14200
SsMYB158	evm.model.Chr8.494	GmMYB074	Glyma11g15180
SsMYB159	evm.model.Chr8.618	GmMYB166	Glyma11g19980
SsMYB159	evm.model.Chr8.618	GmMYB217	Glyma12g30140
SsMYB160	evm.model.Chr8.786	GmMYB075	Glyma12g31950
SsMYB146	evm.model.Chr8.1089	GmMYB117	Glyma12g34650
SsMYB159	evm.model.Chr8.618	GmMYB216	Glyma12g08480
SsMYB157	evm.model.Chr8.426	GmMYB179	Glyma12g06180
SsMYB152	evm.model.Chr8.2421	GmMYB119	Glyma13g04920
SsMYB160	evm.model.Chr8.786	GmMYB181	Glyma13g38520
SsMYB156	evm.model.Chr8.323	GmMYB121	Glyma13g42430
SsMYB157	evm.model.Chr8.426	GmMYB188	Glyma13g41470
SsMYB158	evm.model.Chr8.494	GmMYB037	Glyma13g40830
SsMYB159	evm.model.Chr8.618	GmMYB167	Glyma13g39760
SsMYB150	evm.model.Chr8.2330	GmMYB077	Glyma13g05550
SsMYB151	evm.model.Chr8.2348	GmMYB004	Glyma13g05370
SsMYB146	evm.model.Chr8.1089	GmMYB017	Glyma13g32090
SsMYB157	evm.model.Chr8.426	GmMYB020	Glyma15g03920
SsMYB158	evm.model.Chr8.494	GmMYB082	Glyma15g04620
SsMYB147	evm.model.Chr8.1463	GmMYB123	Glyma15g41250
SsMYB153	evm.model.Chr8.2532	GmMYB125	Glyma16g07960
SsMYB150	evm.model.Chr8.2330	GmMYB092	Glyma18g49630
SsMYB151	evm.model.Chr8.2348	GmMYB007	Glyma18g49360
SsMYB152	evm.model.Chr8.2421	GmMYB131	Glyma19g02090
SsMYB150	evm.model.Chr8.2330	GmMYB093	Glyma19g02890
SsMYB151	evm.model.Chr8.2348	GmMYB046	Glyma19g02600
SsMYB153	evm.model.Chr8.2532	GmMYB130	Glyma19g00930
SsMYB153	evm.model.Chr8.2532	GmMYB043	Glyma19g14270
SsMYB165	evm.model.Chr9.1475	GmMYB098	Glyma02g41180
SsMYB166	evm.model.Chr9.1502	GmMYB170	Glyma02g41440
SsMYB163	evm.model.Chr9.1198	GmMYB229	Glyma02g39070
SsMYB169	evm.model.Chr9.404	GmMYB230	Glyma03g00980
SsMYB170	evm.model.Chr9.406	GmMYB160	Glyma03g00890
SsMYB171	evm.model.Chr9.506	GmMYB239	Glyma05g06410
SsMYB162	evm.model.Chr9.1165	GmMYB144	Glyma08g44950
SsMYB165	evm.model.Chr9.1475	GmMYB116	Glyma11g33620
SsMYB166	evm.model.Chr9.1502	GmMYB203	Glyma14g07510
SsMYB163	evm.model.Chr9.1198	GmMYB235	Glyma14g37140
SsMYB171	evm.model.Chr9.506	GmMYB124	Glyma16g06900
SsMYB173	evm.model.Chr9.966	GmMYB090	Glyma18g10920
SsMYB162	evm.model.Chr9.1165	GmMYB089	Glyma18g07960
SsMYB163	evm.model.Chr9.1198	GmMYB088	Glyma18g07360
SsMYB165	evm.model.Chr9.1475	GmMYB129	Glyma18g04580
SsMYB169	evm.model.Chr9.404	GmMYB236	Glyma19g29670
SsMYB170	evm.model.Chr9.406	GmMYB222	Glyma19g29750
SsMYB171	evm.model.Chr9.506	GmMYB238	Glyma19g07830
SsMYB177	evm.model.Scaffold_802.242	GmMYB021	Glyma05g35050
SsMYB180	evm.model.Scaffold_802.59	GmMYB225	Glyma05g36120
SsMYB177	evm.model.Scaffold_802.242	GmMYB104	Glyma07g10320
SsMYB180	evm.model.Scaffold_802.59	GmMYB224	Glyma07g15250
SsMYB177	evm.model.Scaffold_802.242	GmMYB044	Glyma08g04670
SsMYB181	evm.model.Scaffold_802.704	GmMYB145	Glyma09g25590
SsMYB178	evm.model.Scaffold_802.394	GmMYB068	Glyma09g29940
SsMYB177	evm.model.Scaffold_802.242	GmMYB111	Glyma09g31570
SsMYB181	evm.model.Scaffold_802.704	GmMYB152	Glyma16g31280
SsMYB178	evm.model.Scaffold_802.394	GmMYB087	Glyma16g34490

## Sheet: Table S7
Supplementary Table 7 Transcription of R2R3-MYB gene in different tissues of S. suberectus
Gene name	Gene ID	Root	Stem	Leave	Flower	Fruit
SsMYB1	evm.model.Chr1.1041	63.5199	62.0181	72.1418	98.1221	49.4537
SsMYB2	evm.model.Chr1.1042	66.1288	48.4636	36.113	47.0394	72.6252
SsMYB3	evm.model.Chr1.1197	3.38625	1.94031	0.597654	4.88016	3.67522
SsMYB4	evm.model.Chr1.1275	0	0	27.5883	0.0233034	0.0057624
SsMYB5	evm.model.Chr1.2117	0.340245	6.97616	21.4353	13.8209	16.4595
SsMYB6	evm.model.Chr1.2135	0.0667129	2.74082	18.7122	4.71356	4.70715
SsMYB7	evm.model.Chr1.2260	0	0	0	0	0
SsMYB8	evm.model.Chr1.2295	5.11389	3.33401	2.0949	2.3131	1.26181
SsMYB9	evm.model.Chr1.2509	25.4444	19.9578	16.7779	28.7099	3.32322
SsMYB10	evm.model.Chr1.2938	16.7929	23.985	0.0680234	0.00965108	2.93733
SsMYB11	evm.model.Chr1.3132	6.44886	4.01617	1.09331	0.619505	0.0138222
SsMYB12	evm.model.Chr1.347	0.859804	1.49323	1.6675	0.718414	0.397594
SsMYB13	evm.model.Chr1.3706	7.92657	4.23532	0	0.0133055	0.117227
SsMYB14	evm.model.Chr1.3788	2.72283	2.88085	11.9223	13.9981	29.0928
SsMYB15	evm.model.Chr1.3866	1.74584	0.398701	6.8431	4.42722	0.782695
SsMYB16	evm.model.Chr1.4261	27.0118	37.0511	13.8658	29.6819	55.2864
SsMYB17	evm.model.Chr2.131	0	0	0	0.0360137	0
SsMYB18	evm.model.Chr2.1456	2.68811	3.18448	0.180691	0.0924484	0.0263048
SsMYB19	evm.model.Chr2.1610	0	0	0.0731855	8.68744	0.0355116
SsMYB20	evm.model.Chr2.1612	0	0	0	0.0354427	0
SsMYB21	evm.model.Chr2.1631	0.0222165	0.13907	1.38634	8.71131	0
SsMYB22	evm.model.Chr2.1635	16.2578	21.688	27.0282	11.05	6.0421
SsMYB23	evm.model.Chr2.1675	13.6045	13.2157	7.77758	10.4291	2.38647
SsMYB24	evm.model.Chr2.2005	1.09135	1.52601	2.55847	2.80086	0.781862
SsMYB25	evm.model.Chr2.2074	46.4206	24.1897	8.53498	13.5552	18.3506
SsMYB26	evm.model.Chr2.2591	34.4719	12.6623	21.4476	29.427	55.7036
SsMYB27	evm.model.Chr2.2592	21.2554	8.31934	11.0103	12.0261	20.0518
SsMYB28	evm.model.Chr2.2663	8.79918	2.95121	0.177161	1.34092	1.38317
SsMYB29	evm.model.Chr2.2788	0.0315671	0	0.0680791	0.80479	0
SsMYB30	evm.model.Chr2.2838	24.2708	25.584	3.50557	1.25099	0.285938
SsMYB31	evm.model.Chr2.2951	8.65782	13.4454	1.23229	0.166584	0.168584
SsMYB32	evm.model.Chr2.3104	0.611505	0.901684	0.0925576	0.0876106	0.0559535
SsMYB33	evm.model.Chr2.349	2.18934	2.95978	2.38158	3.27643	10.2798
SsMYB34	evm.model.Chr2.492	8.30916	10.8694	1.15433	1.20629	2.65418
SsMYB35	evm.model.Chr2.62	4.35869	0.738089	0.666082	0.17788	0
SsMYB36	evm.model.Chr2.902	0	0	0	0	0
SsMYB37	evm.model.Chr3.1116	7.1336	0.0244541	0.12478	0.0218218	0.0492623
SsMYB38	evm.model.Chr3.1175	13.4395	25.6491	3.29571	10.2356	8.93185
SsMYB39	evm.model.Chr3.1320	10.5636	20.0506	55.1735	69.0001	25.1389
SsMYB40	evm.model.Chr3.1978	0.0057832	0	0	0.186561	0.0918798
SsMYB41	evm.model.Chr3.2000	0	0	0	0	0
SsMYB42	evm.model.Chr3.2005	0.0172946	2.37952	0.229948	0.279	0.272322
SsMYB43	evm.model.Chr3.2228	0	0.75416	0.0456743	0.18614	0.0177569
SsMYB44	evm.model.Chr3.2235	5.25029	4.68546	2.6517	6.92099	6.4433
SsMYB45	evm.model.Chr3.2236	0	0	0	0	0
SsMYB46	evm.model.Chr3.2237	0.599501	0.0287337	22.514	21.5525	2.35967
SsMYB47	evm.model.Chr3.2238	0.227656	16.52	7.92917	2.41876	0.973929
SsMYB48	evm.model.Chr3.2388	3.97834	3.37529	2.21694	3.23249	6.77974
SsMYB49	evm.model.Chr3.2496	12.3606	5.23363	0.171602	5.03469	1.70438
SsMYB50	evm.model.Chr3.2641	66.8667	71.2534	0.789661	0.363765	65.9366
SsMYB51	evm.model.Chr3.2728	18.1141	15.547	17.2243	1.12198	0.501403
SsMYB52	evm.model.Chr3.2990	17.2845	22.3626	17.8072	20.7542	27.7965
SsMYB53	evm.model.Chr3.3198	0.395723	0.124083	0.0410924	0	0.0125401
SsMYB54	evm.model.Chr3.3203	0.0439624	0.0995412	0.0282835	0	0
SsMYB55	evm.model.Chr3.325	0.167724	0	0.0202714	0.0186214	0
SsMYB56	evm.model.Chr3.326	0.0513547	0	0	0	0
SsMYB57	evm.model.Chr3.442	0	0	3.5482	0.0299103	0.0160705
SsMYB58	evm.model.Chr3.448	0.19253	0.397603	15.441	16.888	16.4438
SsMYB59	evm.model.Chr3.477	0	0.0115122	15.5844	10.9078	0.558349
SsMYB60	evm.model.Chr3.768	0.0368977	0	0.222546	15.9575	0
SsMYB61	evm.model.Chr4.110	92.7175	162.299	178.917	83.7286	0.508616
SsMYB62	evm.model.Chr4.1197	33.8617	39.2817	23.7161	26.8883	43.8913
SsMYB63	evm.model.Chr4.1237	0.538709	0.184693	0.337642	0.205129	0
SsMYB64	evm.model.Chr4.1425	1.42599	0.680028	0.215116	0.414003	3.99813
SsMYB65	evm.model.Chr4.1669	20.5564	21.0856	17.7656	18.6984	19.4389
SsMYB66	evm.model.Chr4.1704	1.07866	2.07186	18.5893	18.9556	6.61013
SsMYB67	evm.model.Chr4.1714	16.3716	9.66645	0.98797	11.8986	0.266846
SsMYB68	evm.model.Chr4.212	3.13001	9.01936	1.20651	1.10236	0.147505
SsMYB69	evm.model.Chr4.2120	0	0	0	0	0
SsMYB70	evm.model.Chr4.2123	0	0	0	0	0
SsMYB71	evm.model.Chr4.2124	0	0	0	0	0
SsMYB72	evm.model.Chr4.2173	2.67016	3.49196	18.9251	22.9719	7.53687
SsMYB73	evm.model.Chr4.2174	1.51028	1.43725	5.25248	9.79012	2.10188
SsMYB74	evm.model.Chr4.220	24.0923	17.8606	11.9184	13.5619	19.2851
SsMYB75	evm.model.Chr4.2279	6.38627	3.96891	4.68605	7.27899	3.33107
SsMYB76	evm.model.Chr4.2795	0.0560349	0.0194435	0.128052	2.90462	0
SsMYB77	evm.model.Chr4.3015	2.25174	0.0359237	0.155626	1.77325	15.3946
SsMYB78	evm.model.Chr4.3190	0.282999	0.248161	0.350843	1.10145	0.0164417
SsMYB79	evm.model.Chr4.3192	0.0681668	0.140047	15.3743	22.5309	0.148172
SsMYB80	evm.model.Chr4.3266	0.858206	0.233894	4.54207	1.30971	0
SsMYB81	evm.model.Chr4.481	1.66962	2.63153	2.80619	6.3168	1.93085
SsMYB82	evm.model.Chr4.554	0.0926186	0.148782	0.649107	0.779674	1.23905
SsMYB83	evm.model.Chr4.604	0	0.0329841	3.93528	2.50547	0
SsMYB84	evm.model.Chr4.999	12.621	9.62697	1.84558	10.1665	15.6335
SsMYB85	evm.model.Chr5.1056	13.7452	19.552	15.1279	13.1654	29.8401
SsMYB86	evm.model.Chr5.1267	13.9993	18.4824	12.1828	16.129	2.69688
SsMYB87	evm.model.Chr5.1326	0.375417	0.14447	0.0404613	0.0854541	0
SsMYB88	evm.model.Chr5.1339	7.62996	9.33524	7.35221	2.71511	0.460733
SsMYB89	evm.model.Chr5.1343	0.0609042	0.199798	0.199858	5.38669	0
SsMYB90	evm.model.Chr5.1349	0.00534489	0	0.079903	15.964	0.00961686
SsMYB91	evm.model.Chr5.1506	6.27606	7.00746	18.7038	22.939	2.86295
SsMYB92	evm.model.Chr5.1820	4.34177	6.13024	2.8992	1.5462	1.12142
SsMYB93	evm.model.Chr5.209	2.75587	3.11001	1.41648	3.11983	3.20073
SsMYB94	evm.model.Chr5.296	14.0175	8.09862	56.2237	42.0352	32.8578
SsMYB95	evm.model.Chr5.3142	11.3285	18.6851	9.15987	0.795883	0.216833
SsMYB96	evm.model.Chr5.3287	0.190709	0.0470228	0.0298944	4.08804	0
SsMYB97	evm.model.Chr5.3420	3.18961	13.0431	21.6698	69.228	20.3817
SsMYB98	evm.model.Chr5.3598	3.82747	11.9915	0.955104	0.100782	0.0991013
SsMYB99	evm.model.Chr5.372	5.13601	5.45931	1.44606	3.91958	0.890308
SsMYB100	evm.model.Chr6.1116	7.45614	11.4954	12.6213	3.96014	8.93185
SsMYB101	evm.model.Chr6.1272	6.00502	2.28448	1.76446	0.0919396	11.3598
SsMYB102	evm.model.Chr6.1377	0.0366933	0.0412116	1.35043	5.05323	0
SsMYB103	evm.model.Chr6.1378	2.52424	12.8387	0	2.26198	0
SsMYB104	evm.model.Chr6.1392	0.00574667	0.489108	0.079616	0.185474	0
SsMYB105	evm.model.Chr6.1427	2.5591	1.76416	0.927398	2.26391	2.84216
SsMYB106	evm.model.Chr6.1555	13.799	53.3521	1.76744	1.69088	1.91541
SsMYB107	evm.model.Chr6.1649	3.98538	4.6652	2.68553	6.43752	0.433807
SsMYB108	evm.model.Chr6.1768	11.7808	15.3163	1.10384	2.554	0.814748
SsMYB109	evm.model.Chr6.1854	32.5975	26.5016	13.2184	30.5792	18.2326
SsMYB110	evm.model.Chr6.2236	0	0	0	0	0
SsMYB111	evm.model.Chr6.2237	0	0	0	0	0
SsMYB112	evm.model.Chr6.2239	0	0	0	0	0
SsMYB113	evm.model.Chr6.2314	20.6549	25.3714	29.4141	42.0862	40.4313
SsMYB114	evm.model.Chr6.2653	82.6081	402.372	35.3514	39.6088	8.52304
SsMYB115	evm.model.Chr6.2663	0.0169733	0	0.0286934	0	0
SsMYB116	evm.model.Chr6.2908	1.53017	5.26351	11.4458	9.55036	2.05931
SsMYB117	evm.model.Chr6.2948	13.4152	16.8779	46.3256	30.1949	39.5722
SsMYB118	evm.model.Chr6.3028	4.78708	3.53085	3.78402	5.0541	4.50012
SsMYB119	evm.model.Chr6.3095	0.659869	0.790339	4.22578	11.2475	0.492927
SsMYB120	evm.model.Chr6.3309	0	0.029871	0	0.00704467	0
SsMYB121	evm.model.Chr6.455	1.48354	0.14175	0.526356	1.16444	0.873055
SsMYB122	evm.model.Chr6.51	15.5081	9.86406	18.4661	29.1495	17.3997
SsMYB123	evm.model.Chr6.602	34.7698	31.0682	62.0708	71.5793	0.195077
SsMYB124	evm.model.Chr6.779	0.149278	0	0	0.015198	0
SsMYB125	evm.model.Chr7.1143	4.96453	4.95293	0.292649	0.644722	0.0112941
SsMYB126	evm.model.Chr7.1144	5.64816	7.74366	1.19064	6.60929	0.155781
SsMYB127	evm.model.Chr7.1254	23.5126	14.3586	29.6536	33.7479	7.1523
SsMYB128	evm.model.Chr7.1317	2.75087	0.0934599	0.0791008	0.225292	0.135641
SsMYB129	evm.model.Chr7.1428	2.5216	5.03613	6.1796	6.31391	11.708
SsMYB130	evm.model.Chr7.1590	0.966293	0.631067	0.0188357	0.557017	0.521519
SsMYB131	evm.model.Chr7.1867	5.4951	2.35709	2.25685	2.6719	0.632399
SsMYB132	evm.model.Chr7.1934	0.88006	2.47225	8.1217	53.4451	57.5548
SsMYB133	evm.model.Chr7.1935	0.379053	0.727133	0.177771	0.372358	0.387874
SsMYB134	evm.model.Chr7.1975	0.100685	1.06903	43.3653	30.9075	6.60708
SsMYB135	evm.model.Chr7.2240	1.83134	2.31378	0.641316	2.28955	0.338901
SsMYB136	evm.model.Chr7.2269	12.7986	9.36592	2.24243	4.60541	5.47552
SsMYB137	evm.model.Chr7.2442	15.5479	4.63221	0.700473	2.21828	0.307114
SsMYB138	evm.model.Chr7.2485	0.0197088	0.0922012	0.0820912	0.222567	0.371919
SsMYB139	evm.model.Chr7.2780	1.68039	0.635451	0.0151673	0.037043	0.0755729
SsMYB140	evm.model.Chr7.2781	0.537159	5.63174	0	0.0174874	0.0191384
SsMYB141	evm.model.Chr7.3183	2.19761	0.315459	0	0.0162077	0.202295
SsMYB142	evm.model.Chr7.3242	0.95152	0.263362	6.92191	5.50166	14.773
SsMYB143	evm.model.Chr7.332	0.0598361	0.266057	0.153247	44.1276	0.341686
SsMYB144	evm.model.Chr7.776	0.463905	0.0468642	0	4.40961	0
SsMYB145	evm.model.Chr7.778	0.0281013	0	0.0923675	3.64922	0
SsMYB146	evm.model.Chr8.1089	0.28203	0.187177	0.067868	3.36405	0.0484945
SsMYB147	evm.model.Chr8.1463	1.90865	2.65652	1.22407	4.48134	0.330137
SsMYB148	evm.model.Chr8.1513	15.2885	18.5797	10.7592	7.93877	3.28078
SsMYB149	evm.model.Chr8.2191	4.61877	4.18998	4.44442	0.789918	0.0280151
SsMYB150	evm.model.Chr8.2330	0.084439	0.547758	51.5342	44.1594	3.188
SsMYB151	evm.model.Chr8.2348	0.358978	11.0732	13.7619	21.231	37.0814
SsMYB152	evm.model.Chr8.2421	0	0	0	0.271836	0
SsMYB153	evm.model.Chr8.2532	0	0	0	0	0
SsMYB154	evm.model.Chr8.2538	0	0	0	0	0
SsMYB155	evm.model.Chr8.2539	0	0	0	0	0
SsMYB156	evm.model.Chr8.323	4.37018	0.419105	0.175745	0.930986	7.04432
SsMYB157	evm.model.Chr8.426	6.59493	1.69789	2.51599	0.199618	0.00817831
SsMYB158	evm.model.Chr8.494	59.2421	27.3305	0.245845	0.0509671	1.87745
SsMYB159	evm.model.Chr8.618	13.9502	12.5236	0.0383228	0.533519	0.12482
SsMYB160	evm.model.Chr8.786	0	0	0	0	0
SsMYB161	evm.model.Chr8.854	0	0.0479019	0.0484707	0.123491	0
SsMYB162	evm.model.Chr9.1165	0.523054	0.405784	0.990708	1.21884	0.65862
SsMYB163	evm.model.Chr9.1198	0	0	0	0	0
SsMYB164	evm.model.Chr9.1209	28.9748	33.6356	36.6831	34.1513	25.6689
SsMYB165	evm.model.Chr9.1475	7.44596	11.1405	1.51839	0.473361	1.05932
SsMYB166	evm.model.Chr9.1502	6.81058	12.2763	29.3321	14.6595	87.4437
SsMYB167	evm.model.Chr9.1578	0.174572	0.103671	0.218537	0.186061	0
SsMYB168	evm.model.Chr9.267	12.6652	11.5499	1.89482	1.15256	1.1745
SsMYB169	evm.model.Chr9.404	1.49622	0.664684	0.33767	7.16556	0.0957577
SsMYB170	evm.model.Chr9.406	0.0143024	0	0.0267774	1.29763	0
SsMYB171	evm.model.Chr9.506	0.218132	0.0469361	1.10882	0.475009	0
SsMYB172	evm.model.Chr9.669	3.74548	1.9346	1.53564	2.76949	2.08583
SsMYB173	evm.model.Chr9.966	0	0.0303761	0.125306	0.0596809	0
SsMYB174	evm.model.Chr9.968	0	0	0	0	0
SsMYB175	evm.model.Scaffold_264.1	0	0.0126521	0.153295	0.0272204	0.020521
SsMYB176	evm.model.Scaffold_428.1	0.340302	0.0689185	0.0191598	0.00880012	0.0362517
SsMYB177	evm.model.Scaffold_802.242	0.6813	0.936477	0.0321229	0.161295	0.173054
SsMYB178	evm.model.Scaffold_802.394	7.55476	5.49225	1.08277	0.320579	1.10181
SsMYB179	evm.model.Scaffold_802.422	36.9386	186.713	81.7423	54.5452	38.4976
SsMYB180	evm.model.Scaffold_802.59	0.138393	0.1667	0	0.2556	0.176309
SsMYB181	evm.model.Scaffold_802.704	4.20015	1.99199	0.133322	1.65703	0.106711
